# Supplementary material for: Integrated Transcriptome and Metabolome Analysis Reveals an Essential Role for Auxin in Hypocotyl Elongation during End-of-Day Far-Red Treatment of Cucurbita moschata (Duch. Ex Lam.)
Source: MDPI journal article supplement (doi:10.3390/agronomy11050853), 2021-04-27
Supplement: s1 [file s1]

Archive with 10 entries (10 files):
- Attache Table.xls
- Fig S1.pdf
- Fig S3.jpg
- Fig S6.pdf
- Fig. S8.pdf
- Figure S2.jpg
- Figure S4.tiff
- Figure S5.tiff
- Figure S7.pdf
- Figure S9.tif
