# Supplementary material for: Integrated Transcriptome and Metabolome Analysis Reveals an Essential Role for Auxin in Hypocotyl Elongation during End-of-Day Far-Red Treatment of Cucurbita moschata (Duch. Ex Lam.)
Source: MDPI journal article supplement (doi:10.3390/agronomy11050853), 2021-04-27
Supplement: s1 [file s1 › Attache Table.xls]

## Sheet: Table S1
Gene ID	Forward primer	Reverse primer
Actin	CTGCTGAGATGAACAAAAGGTC	TGTGCAGTAGTACTTGGTGGTCTC
CmoCh07G010780	TCGTGGGAAGAACTTCTTGATGCT	CCCATCAAAACATAAGACGCAACC
CmoCh14G012580	AATTTGATTCCTGTTCGTAGCG	GAATGGTCGATCTGTCATTTGG
CmoCh15G007120	ATGACCGTTGCTTCCCTTATCCA	CAGTGTCAGTGTAAGCACGTAGAGC
CmoCh11G017330	GTTAAGCACTCTGGTCCAACTAAGTT	GCTGATGGGAGTGTCAGTGTTAGG
CmoCh02G003530	TCAGAGGAAACGGTTCGTAGTTC	CCTCAGCATGGCTAAGAAGTTGTT
CmoCh12G006890	CAGGGAAACCACAGAAAATGAATC	GAAGATCAATCGGCCAAAATAACC
CmoCh09G007300	GGTTTGAAAAGGTGAGTGGCAGTA	AAGAGCATTAAGCAAAGGATGGC
CmoCh11G017690	GAGATGAGCAAACCTCCCACT	TAGTTCCGAGCCATCATACCC
CmoCh04G021920	CAAGGAATTGTACCGTTTGTGT	AAAGTAATGGGTAGCGCTATCA
CmoCh01G008510	GATGGTCGGGTGCTGTTCGTTGA	GCCAATAAACGAAAGCGAGGGAG
CmoCh15G011500	TATGAACAAGGAAGTAGGGAGCAGT	CCAAAAGCTGTTGATAGCTCTGATA
CmoCh04G024530	GACAGGTTGAGGGAGTAAAGCACTCA	AAAGGCGGTTCTAGGGAGCAAAG
CmoCh04G009080	AGTTCTTGGGAAATAGGAGTGGGC	CATTGGCTGTTGCTTTGGGTATG
CmoCh15G002920	GATTGCTCAAGTTCGAACTGTT	TCAACGTGTTATGAATCGCATC

## Sheet: Table S2
Metabolite	Cmo_mSC_1	Cmo_mSC_2	Cmo_mSC_3	Cmo_mSC_4	Cmo_mSC_5	Cmo_mSC_6	Cmo_mSR_1	Cmo_mSR_2	Cmo_mSR_3	Cmo_mSR_4	Cmo_mSR_5	Cmo_mSR_6	kegg id
L-Tryptophan	31010.7	33628.5	37390.5	40788.9	36187.3	38637.7	73608.3	64980.7	79974.4	81051.2	98045.2	88507.5	C00078
Indole	1119.78	931.659	910.929	656.501	880.406	1030.95	2575.09	1692.88	1823.14	2776.65	2707.84	2221.51	C00463
2-Methylindole	1017.68	710.164	745.092	583.33	556.744	736.674	1520.09	1586.6	1648.84	1754.68	1266.78	1574.75	C08313
3-Formylindole	2532.53	2619.3	2454.21	2603.81	2283.97	2634.37	5496.91	5954.97	5451.85	6123.37	6247.17	5564.52	C08493
3-Indoleacrylic acid	71573.6	74531.8	73009.9	81129.8	69931.4	86294.6	168823	203588	166150	183534	175046	173017	NA
Tryptophan	57834.2	61895.7	57313.5	68265.9	60245.4	70316.5	144664	171310	148512	161363	153953	151963	C00806

## Sheet: Table S3
Sample	Raw Data		Valid Data		Valid Ratio(reads)	Q20%	Q30%	GC content%
	Read	Base	Read	Base
Cmo_SCK1	45780920	6.87G	42752256	6.41G	93.38	99.99	98.01	44
Cmo_SCK2	40704360	6.11G	39027408	5.85G	95.88	99.99	98.07	44
Cmo_SCK3	53372118	8.01G	50309914	7.55G	94.26	99.99	98.06	44
Cmo_SR1	49506336	7.43G	47558162	7.13G	96.06	99.99	97.96	44
Cmo_SR2	54037758	8.11G	52252110	7.84G	96.7	99.98	98	44
Cmo_SR3	51048482	7.66G	49040518	7.36G	96.07	99.98	97.93	44

## Sheet: Table S4
List of DEGs during EOD-FR treatment in hypocotyl
Gene ID	fc	log2(fc)	pval	qval	regulation
CmoCh15G009170	0.0174031	-5.84451	3.44277e-40	8.24888e-36	down
CmoCh11G004290	8.85899	3.14714	5.77396e-36	6.91721e-32	up
CmoCh03G007580	5.47499	2.45286	3.26183e-31	2.60512e-27	up
CmoCh09G008680	4.77861	2.25659	1.07009e-30	6.40986e-27	up
CmoCh11G007030	9.72033	3.28101	1.99312e-27	9.55103e-24	up
CmoCh14G012580	0.0774862	-3.68992	5.32117e-26	2.12492e-22	down
CmoCh07G004530	0.126473	-2.9831	5.98356e-25	2.04809e-21	down
CmoCh01G006340	0.117264	-3.09217	9.14141e-22	2.65005e-18	down
CmoCh05G012220	4.14116	2.05003	9.95429e-22	2.65005e-18	up
CmoCh15G007120	0.0949446	-3.39677	2.57082e-20	6.15969e-17	down
CmoCh14G003770	0.204564	-2.28938	3.90421e-20	8.50407e-17	down
CmoCh20G011260	10375.7	13.3409	2.24235e-19	4.47722e-16	up
CmoCh14G005880	1.80805e-05	-15.7552	3.31981e-19	6.11867e-16	down
CmoCh08G006150	5.2275	2.38612	3.84372e-19	6.57825e-16	up
CmoCh17G007460	0.0201995	-5.62953	6.63931e-19	1.06052e-15	down
CmoCh17G000910	3.17627	1.66733	1.14e-18	1.70715e-15	up
CmoCh02G016370	3.39113	1.76177	5.50959e-18	7.76529e-15	up
CmoCh11G010170	4.89046	2.28997	6.79638e-18	9.04674e-15	up
CmoCh08G001880	0.107882	-3.21247	1.08258e-17	1.36519e-14	down
CmoCh05G000620	0.140867	-2.8276	1.20495e-17	1.44352e-14	down
CmoCh14G009460	0.231762	-2.10928	1.48744e-17	1.6971e-14	down
CmoCh19G001820	0.049955	-4.32323	1.6308e-17	1.70648e-14	down
CmoCh05G003580	0.14743	-2.7619	1.6381e-17	1.70648e-14	down
CmoCh13G007780	5.45157e-05	-14.163	2.16556e-17	2.16195e-14	down
CmoCh06G001560	7.46295	2.89975	2.95386e-17	2.77084e-14	up
CmoCh18G001790	8.99822	3.16964	3.00676e-17	2.77084e-14	up
CmoCh03G006740	18.4366	4.2045	3.68904e-17	3.27368e-14	up
CmoCh20G000440	0.251059	-1.9939	6.08975e-17	5.21109e-14	down
CmoCh01G006150	0.197338	-2.34126	8.67948e-17	7.03097e-14	down
CmoCh14G013210	0.18158	-2.46132	8.80338e-17	7.03097e-14	down
CmoCh03G010660	0.23056	-2.11679	9.73295e-17	7.46376e-14	down
CmoCh17G002280	6.55755	2.71316	9.9683e-17	7.46376e-14	up
CmoCh13G000980	3.33056	1.73577	1.27148e-16	9.23174e-14	up
CmoCh01G012530	6.80096	2.76574	1.85385e-16	1.30642e-13	up
CmoCh11G010060	5.18854	2.37533	3.75743e-16	2.57223e-13	up
CmoCh08G009170	0.19736	-2.3411	5.1479e-16	3.42622e-13	down
CmoCh19G006780	3.84156	1.94169	5.38297e-16	3.48584e-13	up
CmoCh13G004260	3.92973	1.97443	9.09455e-16	5.73435e-13	up
CmoCh20G004330	0.196009	-2.35101	1.50762e-15	9.26218e-13	down
CmoCh15G011270	3.50705	1.81026	1.78855e-15	1.07134e-12	up
CmoCh20G011580	5.70665	2.51264	2.29079e-15	1.33871e-12	up
CmoCh18G010590	3.19779	1.67707	2.39557e-15	1.36662e-12	up
CmoCh15G001720	0.281939	-1.82654	2.93665e-15	1.63633e-12	down
CmoCh18G001780	10.6743	3.41607	3.5174e-15	1.91539e-12	up
CmoCh11G004140	3.27262	1.71045	3.98132e-15	2.11983e-12	up
CmoCh14G010650	3.6577	1.87094	4.39663e-15	2.29007e-12	up
CmoCh04G007380	0.178454	-2.48637	5.86786e-15	2.98313e-12	down
CmoCh18G002550	3.87459	1.95404	5.97621e-15	2.98313e-12	up
CmoCh03G008950	0.193165	-2.3721	8.61894e-15	4.21448e-12	down
CmoCh10G009480	3.28655	1.71657	9.39038e-15	4.49987e-12	up
CmoCh04G009090	0.18741	-2.41573	1.01586e-14	4.77254e-12	down
CmoCh12G011400	7.92816	2.98699	1.18993e-14	5.48285e-12	up
CmoCh13G006810	6.19491	2.63108	1.24247e-14	5.61689e-12	up
CmoCh03G008650	3.7311	1.8996	1.34745e-14	5.9787e-12	up
CmoCh11G012010	0.271246	-1.88233	1.52958e-14	6.66341e-12	down
CmoCh02G015680	0.198722	-2.33118	2.62384e-14	1.12263e-11	down
CmoCh05G003360	0.158253	-2.65969	4.11532e-14	1.71788e-11	down
CmoCh16G005990	0.234685	-2.0912	4.15848e-14	1.71788e-11	down
CmoCh05G013430	3.05363	1.61052	4.33553e-14	1.76067e-11	up
CmoCh14G005980	0.16618	-2.58918	4.88625e-14	1.95124e-11	down
CmoCh03G012640	0.174886	-2.51551	5.75464e-14	2.26035e-11	down
CmoCh09G003240	5.50872	2.46172	5.90189e-14	2.26364e-11	up
CmoCh16G001640	0.194723	-2.36051	5.95198e-14	2.26364e-11	down
CmoCh04G017480	0.189123	-2.4026	7.07539e-14	2.64885e-11	down
CmoCh08G012040	2.75079	1.45984	8.00649e-14	2.95132e-11	up
CmoCh07G003260	0.116711	-3.09899	9.5746e-14	3.47587e-11	down
CmoCh09G006480	0.11858	-3.07607	1.07966e-13	3.86101e-11	down
CmoCh14G000910	0.218387	-2.19504	1.16337e-13	4.09917e-11	down
CmoCh07G012870	0.248782	-2.00705	1.21118e-13	4.20579e-11	down
CmoCh15G001810	0.225118	-2.15124	1.40944e-13	4.82431e-11	down
CmoCh09G013230	2.72089	1.44408	1.56471e-13	5.28036e-11	up
CmoCh03G010410	4.14448	2.05119	1.63996e-13	5.45744e-11	up
CmoCh02G008510	0.3001	-1.73648	1.96297e-13	6.44284e-11	down
CmoCh13G005440	0.274974	-1.86263	2.00138e-13	6.48015e-11	down
CmoCh14G006350	3.48836	1.80255	2.11623e-13	6.76063e-11	up
CmoCh04G002040	8.34899	3.0616	2.32242e-13	7.32172e-11	up
CmoCh04G024610	0.151708	-2.72063	2.51529e-13	7.82681e-11	down
CmoCh02G000640	0.266648	-1.90699	2.78007e-13	8.5398e-11	down
CmoCh02G013540	3.39553	1.76364	2.93738e-13	8.90882e-11	up
CmoCh18G010090	2.73294	1.45045	4.09757e-13	1.22722e-10	up
CmoCh03G003620	0.150108	-2.73593	4.36809e-13	1.29209e-10	down
CmoCh04G007370	0.213969	-2.22453	4.83823e-13	1.39275e-10	down
CmoCh11G018730	0.278163	-1.846	4.87137e-13	1.39275e-10	down
CmoCh04G027900	0.290646	-1.78266	4.88276e-13	1.39275e-10	down
CmoCh19G009010	0.296142	-1.75564	4.96644e-13	1.39995e-10	down
CmoCh03G000160	0.109374	-3.19266	5.05622e-13	1.40869e-10	down
CmoCh14G015430	0.0425006	-4.55637	5.3845e-13	1.4829e-10	down
CmoCh09G002050	0.332105	-1.59029	5.67187e-13	1.54429e-10	down
CmoCh04G013330	0.314458	-1.66906	6.16501e-13	1.6597e-10	down
CmoCh13G000960	3.66317	1.87309	6.75455e-13	1.79821e-10	up
CmoCh01G006960	0.275659	-1.85904	7.59482e-13	1.99969e-10	down
CmoCh08G012350	7.45724	2.89864	9.3282e-13	2.42939e-10	up
CmoCh20G008410	0.245369	-2.02698	9.58441e-13	2.46927e-10	down
CmoCh05G005380	2.79775	1.48427	1.0361e-12	2.64095e-10	up
CmoCh02G009310	4.5623	2.18976	1.0496e-12	2.64719e-10	up
CmoCh01G008290	3.18309	1.67043	1.06798e-12	2.66551e-10	up
CmoCh19G010470	2.983	1.57676	1.09519e-12	2.70524e-10	up
CmoCh06G009880	3.83369	1.93873	1.16937e-12	2.859e-10	up
CmoCh19G010720	0.272869	-1.87372	1.33802e-12	3.23827e-10	down
CmoCh10G009990	13.0222	3.7029	1.51394e-12	3.62741e-10	up
CmoCh06G008490	3.52896	1.81924	1.78043e-12	4.22368e-10	up
CmoCh20G011700	0.169326	-2.56213	1.8079e-12	4.24679e-10	down
CmoCh04G001640	3.40147	1.76616	1.83957e-12	4.27923e-10	up
CmoCh07G010780	0.259292	-1.94735	1.99252e-12	4.59047e-10	down
CmoCh15G001100	3.35793	1.74757	2.01549e-12	4.59916e-10	up
CmoCh09G000730	0.273927	-1.86814	2.79813e-12	6.32484e-10	down
CmoCh19G006450	2.63782	1.39935	2.97015e-12	6.65093e-10	up
CmoCh15G006900	2.65528	1.40887	3.16937e-12	6.98491e-10	up
CmoCh01G001780	0.000346569	-11.4946	3.17761e-12	6.98491e-10	down
CmoCh03G015100	0.283244	-1.81988	3.21914e-12	7.01188e-10	down
CmoCh19G010790	2.88779	1.52997	3.78463e-12	8.16934e-10	up
CmoCh10G005070	0.196799	-2.34521	3.83103e-12	8.19567e-10	down
CmoCh09G010800	3.13689	1.64934	4.64179e-12	9.84224e-10	up
CmoCh04G021060	3.20515	1.68039	4.773e-12	1.00317e-09	up
CmoCh04G012410	4.5676	2.19144	4.96604e-12	1.03466e-09	up
CmoCh08G002140	0.160615	-2.63832	5.10531e-12	1.04917e-09	down
CmoCh06G006490	2.81733	1.49433	5.12326e-12	1.04917e-09	up
CmoCh02G004170	3.43819	1.78165	5.24538e-12	1.06508e-09	up
CmoCh15G014200	3.98873	1.99593	5.70887e-12	1.14945e-09	up
CmoCh17G010390	0.0428062	-4.54604	6.01208e-12	1.20041e-09	down
CmoCh13G008360	4.50906	2.17283	8.42742e-12	1.66877e-09	up
CmoCh04G030960	3.62945	1.85975	9.36555e-12	1.83933e-09	up
CmoCh16G008550	2.83915	1.50546	1.05015e-11	2.03075e-09	up
CmoCh06G007930	0.039537	-4.66065	1.05097e-11	2.03075e-09	down
CmoCh02G007990	4.04746	2.01702	1.0872e-11	2.08394e-09	up
CmoCh09G001950	0.133666	-2.90329	1.26932e-11	2.41371e-09	down
CmoCh15G014460	0.273881	-1.86838	1.44981e-11	2.73524e-09	down
CmoCh15G006880	3.66725	1.8747	1.52284e-11	2.85056e-09	up
CmoCh16G009260	0.000215234	-12.1818	1.59629e-11	2.96489e-09	down
CmoCh03G006730	12.1952	3.60824	1.65921e-11	3.05805e-09	up
CmoCh19G009070	0.259134	-1.94823	1.77283e-11	3.24253e-09	down
CmoCh10G005150	3.60945	1.85178	2.10575e-11	3.82226e-09	up
CmoCh14G015410	4.03198	2.01149	2.43377e-11	4.38444e-09	up
CmoCh02G006280	4.67151	2.22389	3.13127e-11	5.5989e-09	up
CmoCh19G002010	0.332783	-1.58735	3.22925e-11	5.69106e-09	down
CmoCh13G001870	0.112319	-3.15432	3.23223e-11	5.69106e-09	down
CmoCh01G016190	3.11441	1.63896	3.25407e-11	5.69106e-09	up
CmoCh01G013600	2.09584e-05	-15.5421	3.90437e-11	6.7789e-09	down
CmoCh12G013080	0.0741551	-3.75331	3.97789e-11	6.85685e-09	down
CmoCh01G007710	2.76247	1.46596	4.03151e-11	6.88796e-09	up
CmoCh09G006590	7.15738	2.83943	4.05343e-11	6.88796e-09	up
CmoCh05G007670	2.69913	1.43249	4.14564e-11	6.99505e-09	up
CmoCh01G013720	6.17857	2.62727	4.19211e-11	7.02399e-09	up
CmoCh13G009770	4.69157	2.23007	5.3934e-11	8.97402e-09	up
CmoCh04G028160	2.98827	1.57931	5.65365e-11	9.34217e-09	up
CmoCh09G010270	2.70466	1.43545	6.58995e-11	1.08147e-08	up
CmoCh01G002480	2.96403	1.56756	6.67669e-11	1.08826e-08	up
CmoCh07G004220	3.23007	1.69156	6.72554e-11	1.08881e-08	up
CmoCh02G013890	2.68105	1.4228	6.83367e-11	1.09889e-08	up
CmoCh04G013980	0.123093	-3.02218	8.51061e-11	1.35943e-08	down
CmoCh05G001740	0.251675	-1.99037	8.85498e-11	1.40507e-08	down
CmoCh06G006860	5.27082	2.39803	9.36813e-11	1.47671e-08	up
CmoCh07G006820	0.268266	-1.89827	9.46783e-11	1.48267e-08	down
CmoCh11G018580	3.41165	1.77047	9.56966e-11	1.48889e-08	up
CmoCh18G002180	3.02492	1.5969	9.66972e-11	1.49475e-08	up
CmoCh10G001210	0.339482	-1.55859	1.07731e-10	1.65463e-08	down
CmoCh05G010920	2.99525	1.58268	1.21502e-10	1.85426e-08	up
CmoCh10G004490	2.51534	1.33075	1.23447e-10	1.87202e-08	up
CmoCh12G001500	2.64618	1.40391	1.33841e-10	2.01688e-08	up
CmoCh12G006420	0.268798	-1.89541	1.35157e-10	2.02397e-08	down
CmoCh03G012820	0.264022	-1.92127	1.53945e-10	2.291e-08	down
CmoCh19G007820	0.213954	-2.22463	1.55826e-10	2.30469e-08	down
CmoCh19G010210	3.17194	1.66537	1.68487e-10	2.47665e-08	up
CmoCh02G003020	0.218421	-2.19482	1.88971e-10	2.74849e-08	down
CmoCh09G010150	0.148368	-2.75275	1.89274e-10	2.74849e-08	down
CmoCh03G008120	5.76016	2.52611	1.96802e-10	2.84059e-08	up
CmoCh14G012990	4.55986	2.18899	2.2758e-10	3.26516e-08	up
CmoCh11G014030	0.0745986	-3.74471	2.31568e-10	3.3026e-08	down
CmoCh04G001840	3.59565	1.84625	2.36145e-10	3.34795e-08	up
CmoCh04G018090	2.75931	1.46431	2.65339e-10	3.73973e-08	up
CmoCh16G011390	2.91684	1.5444	2.9585e-10	4.14535e-08	up
CmoCh14G012540	0.362838	-1.4626	3.35415e-10	4.67241e-08	down
CmoCh02G008790	2.75291	1.46096	3.80435e-10	5.26892e-08	up
CmoCh08G010670	2.21276	1.14584	3.85729e-10	5.31154e-08	up
CmoCh04G026420	2.53331	1.34103	3.90745e-10	5.34986e-08	up
CmoCh09G010870	4.88293	2.28775	4.08164e-10	5.55659e-08	up
CmoCh04G026650	0.318659	-1.64991	4.50313e-10	6.09576e-08	down
CmoCh19G002490	0.18724	-2.41704	4.70189e-10	6.32907e-08	down
CmoCh03G007380	0.172062	-2.539	4.96029e-10	6.63959e-08	down
CmoCh15G001550	2.85	1.51096	5.16662e-10	6.87735e-08	up
CmoCh06G003340	0.264869	-1.91665	5.60804e-10	7.42368e-08	down
CmoCh02G010570	2.27688	1.18706	5.83642e-10	7.68341e-08	up
CmoCh07G009000	0.332305	-1.58942	5.86838e-10	7.68341e-08	down
CmoCh17G000950	0.354807	-1.49489	5.97344e-10	7.77846e-08	down
CmoCh11G001070	2.1285	1.08984	6.3793e-10	8.26205e-08	up
CmoCh17G012610	0.249399	-2.00347	6.58842e-10	8.48702e-08	down
CmoCh04G014020	0.157655	-2.66516	7.09006e-10	9.08437e-08	down
CmoCh06G011340	2.64153	1.40137	7.20093e-10	9.17736e-08	up
CmoCh11G013070	2.91419	1.5431	7.301e-10	9.25566e-08	up
CmoCh05G007680	2.57493	1.36453	7.71891e-10	9.73395e-08	up
CmoCh06G016900	2.39648	1.26092	7.84649e-10	9.83777e-08	up
CmoCh15G011170	0.363233	-1.46103	7.88335e-10	9.83777e-08	down
CmoCh07G006430	0.180321	-2.47136	9.29232e-10	1.1536e-07	down
CmoCh20G011820	2.37294	1.24667	9.70408e-10	1.1985e-07	up
CmoCh17G000940	0.351408	-1.50878	9.78042e-10	1.20174e-07	down
CmoCh20G011430	2.10009	1.07045	9.9942e-10	1.22174e-07	up
CmoCh12G001550	0.309448	-1.69223	1.18656e-09	1.44315e-07	down
CmoCh01G018820	2.93102	1.5514	1.27674e-09	1.54498e-07	up
CmoCh08G008150	0.300782	-1.73321	1.30603e-09	1.57249e-07	down
CmoCh11G018520	0.242008	-2.04687	1.32332e-09	1.58534e-07	down
CmoCh06G013460	0.311064	-1.68472	1.43239e-09	1.70747e-07	down
CmoCh14G014780	4.11497	2.04088	1.44714e-09	1.71651e-07	up
CmoCh15G005100	7.2429	2.85657	1.51573e-09	1.78901e-07	up
CmoCh13G000300	0.22457	-2.15476	1.5644e-09	1.83741e-07	down
CmoCh06G013090	2.84569	1.50878	1.60185e-09	1.87221e-07	up
CmoCh05G005980	2.55562	1.35367	1.65468e-09	1.92457e-07	up
CmoCh06G006550	0.33966	-1.55784	1.70096e-09	1.96884e-07	down
CmoCh15G000070	0.0801056	-3.64195	1.75773e-09	2.02477e-07	down
CmoCh16G007310	2.15642	1.10864	1.831e-09	2.09267e-07	up
CmoCh14G013470	0.333376	-1.58478	1.83414e-09	2.09267e-07	down
CmoCh20G010840	2.48064	1.31071	1.93054e-09	2.19222e-07	up
CmoCh01G011040	4.33675	2.11661	1.94428e-09	2.1974e-07	up
CmoCh16G000730	4.15847	2.05605	1.98613e-09	2.23417e-07	up
CmoCh14G014180	0.239995	-2.05892	2.06821e-09	2.31562e-07	down
CmoCh12G010830	2.20625	1.1416	2.17529e-09	2.42419e-07	up
CmoCh13G000970	2.91552	1.54375	2.18677e-09	2.4257e-07	up
CmoCh17G008220	4.43947	2.15039	2.27291e-09	2.50963e-07	up
CmoCh04G012060	0.283888	-1.81661	2.34852e-09	2.58122e-07	down
CmoCh04G029590	0.26609	-1.91001	2.37808e-09	2.60177e-07	down
CmoCh14G022280	2.74196	1.45521	2.43053e-09	2.64707e-07	up
CmoCh04G022400	2.40889	1.26837	2.59954e-09	2.81832e-07	up
CmoCh04G011490	2.44386	1.28916	2.72779e-09	2.94404e-07	up
CmoCh11G002730	3.91063	1.9674	2.7464e-09	2.95084e-07	up
CmoCh15G001140	0.245273	-2.02754	3.05547e-09	3.26826e-07	down
CmoCh11G019260	0.303399	-1.72071	3.21931e-09	3.42821e-07	down
CmoCh04G002690	2.35215	1.23398	3.32715e-09	3.52737e-07	up
CmoCh03G000620	2.33373	1.22264	3.36601e-09	3.54418e-07	up
CmoCh02G010710	0.26935	-1.89245	3.37259e-09	3.54418e-07	down
CmoCh06G004500	4.12149	2.04317	3.55933e-09	3.72408e-07	up
CmoCh12G003650	2.35338	1.23473	3.68195e-09	3.83563e-07	up
CmoCh20G007600	0.250224	-1.99871	3.78558e-09	3.92652e-07	down
CmoCh16G003850	2.02033	1.01459	3.82471e-09	3.95e-07	up
CmoCh09G008730	3.66894	1.87536	4.18531e-09	4.30386e-07	up
CmoCh17G002530	2.94844	1.55995	4.28787e-09	4.37868e-07	up
CmoCh19G002470	2.45996	1.29863	4.29461e-09	4.37868e-07	up
CmoCh14G018420	2.2546	1.17287	4.48752e-09	4.55598e-07	up
CmoCh07G007040	0.0362091	-4.78751	4.6044e-09	4.65491e-07	down
CmoCh20G010390	0.255196	-1.97033	4.73519e-09	4.76702e-07	down
CmoCh12G005100	0.151439	-2.72319	5.04341e-09	5.05607e-07	down
CmoCh12G013110	6.50615	2.7018	5.11589e-09	5.10736e-07	up
CmoCh11G017690	0.211537	-2.24102	5.28929e-09	5.25856e-07	down
CmoCh09G007300	0.126545	-2.98227	5.36828e-09	5.29544e-07	down
CmoCh15G005350	2.08124	1.05744	5.37058e-09	5.29544e-07	up
CmoCh10G012710	0.278123	-1.8462	5.41506e-09	5.31741e-07	down
CmoCh15G006250	3.49514	1.80535	5.47535e-09	5.35467e-07	up
CmoCh06G003890	2.0998	1.07025	5.50207e-09	5.35893e-07	up
CmoCh15G009660	3.71955	1.89513	5.63581e-09	5.45294e-07	up
CmoCh14G005060	0.255533	-1.96842	5.65759e-09	5.45294e-07	down
CmoCh15G008030	4.0925	2.03298	5.67299e-09	5.45294e-07	up
CmoCh20G002040	0.107469	-3.21801	5.68963e-09	5.45294e-07	down
CmoCh10G000620	2.62988	1.395	5.97589e-09	5.70447e-07	up
CmoCh03G003760	2.29252	1.19693	6.00203e-09	5.70669e-07	up
CmoCh13G007450	0.274994	-1.86253	6.52512e-09	6.17952e-07	down
CmoCh14G012330	3.19222	1.67456	6.63397e-09	6.23508e-07	up
CmoCh10G006440	3.84726	1.94383	6.63584e-09	6.23508e-07	up
CmoCh08G004300	0.0174806	-5.8381	6.72972e-09	6.29151e-07	down
CmoCh17G002110	10.3263	3.36825	6.74841e-09	6.29151e-07	up
CmoCh15G000940	0.386205	-1.37256	6.79352e-09	6.30902e-07	down
CmoCh15G013530	0.321857	-1.63551	7.0262e-09	6.49992e-07	down
CmoCh12G003380	2.99828	1.58414	7.1963e-09	6.63167e-07	up
CmoCh20G006040	0.171085	-2.54721	7.2594e-09	6.66418e-07	down
CmoCh03G009280	0.300995	-1.73219	7.82124e-09	7.15255e-07	down
CmoCh10G001300	2.20735	1.14232	8.25583e-09	7.52128e-07	up
CmoCh10G008250	2.45821	1.29761	8.35679e-09	7.58442e-07	up
CmoCh07G007620	0.172657	-2.53402	8.78907e-09	7.94665e-07	down
CmoCh11G009160	2.45694	1.29686	9.35512e-09	8.42664e-07	up
CmoCh04G009340	2.40046	1.26331	9.65918e-09	8.66794e-07	up
CmoCh11G007990	2.59692	1.3768	9.73113e-09	8.66866e-07	up
CmoCh18G001800	0.314085	-1.67077	9.73234e-09	8.66866e-07	down
CmoCh02G005430	0.354756	-1.4951	1.04093e-08	9.23731e-07	down
CmoCh01G012820	13.2137	3.72397	1.05297e-08	9.30965e-07	up
CmoCh15G012080	0.204795	-2.28774	1.06324e-08	9.35599e-07	down
CmoCh19G001460	2.85133	1.51163	1.06602e-08	9.35599e-07	up
CmoCh04G015920	2.20839	1.14299	1.0969e-08	9.59186e-07	up
CmoCh16G006670	0.32209	-1.63446	1.10508e-08	9.62825e-07	down
CmoCh02G015960	0.165417	-2.59582	1.1976e-08	1.03966e-06	down
CmoCh07G009800	2.02421	1.01736	1.22969e-08	1.06366e-06	up
CmoCh12G000540	2.50259	1.32342	1.25471e-08	1.0814e-06	up
CmoCh07G007980	0.218072	-2.19712	1.26225e-08	1.084e-06	down
CmoCh01G009570	149235	17.1872	1.28396e-08	1.0987e-06	up
CmoCh12G011520	2.4535	1.29484	1.30264e-08	1.11072e-06	up
CmoCh17G013530	2.93999	1.55581	1.35519e-08	1.14443e-06	up
CmoCh05G001650	0.29876	-1.74294	1.35613e-08	1.14443e-06	down
CmoCh11G001720	2.72764	1.44765	1.3565e-08	1.14443e-06	up
CmoCh13G000590	2.09125	1.06436	1.40654e-08	1.18248e-06	up
CmoCh04G010140	0.363663	-1.45933	1.46349e-08	1.22606e-06	down
CmoCh19G010560	2.21186	1.14526	1.5308e-08	1.27798e-06	up
CmoCh12G000260	60186.9	15.8772	1.62993e-08	1.35601e-06	up
CmoCh11G007680	0.147205	-2.7641	1.70363e-08	1.41242e-06	down
CmoCh12G006160	2.36551	1.24215	1.79183e-08	1.48042e-06	up
CmoCh02G002950	0.182442	-2.45449	1.80181e-08	1.48355e-06	down
CmoCh12G000050	0.151144	-2.726	1.8141e-08	1.48856e-06	down
CmoCh19G005910	2.10579	1.07436	1.83301e-08	1.49894e-06	up
CmoCh18G003190	3.06224	1.61459	1.89525e-08	1.54456e-06	up
CmoCh01G003040	8.14061	3.02514	1.97249e-08	1.59665e-06	up
CmoCh15G002920	0.215342	-2.2153	2.00718e-08	1.61926e-06	down
CmoCh10G003860	0.336435	-1.5716	2.06452e-08	1.65993e-06	down
CmoCh02G002850	10.1594	3.34475	2.10515e-08	1.68131e-06	up
CmoCh01G002290	0.205212	-2.28481	2.12825e-08	1.69411e-06	down
CmoCh06G015100	2.06401	1.04545	2.15732e-08	1.71157e-06	up
CmoCh08G002280	2.80792	1.4895	2.21536e-08	1.75182e-06	up
CmoCh07G009220	2.35485	1.23563	2.22578e-08	1.75427e-06	up
CmoCh13G011580	0.344082	-1.53918	2.24974e-08	1.76734e-06	down
CmoCh04G024210	2.52381	1.3356	2.27104e-08	1.77824e-06	up
CmoCh14G006650	8.4924	3.08617	2.34625e-08	1.83114e-06	up
CmoCh09G012810	2.17298	1.11968	2.41807e-08	1.88107e-06	up
CmoCh07G006120	0.219885	-2.18518	2.42765e-08	1.88241e-06	down
CmoCh09G008870	19.1278	4.2576	2.4398e-08	1.88573e-06	up
CmoCh04G001450	0.352974	-1.50237	2.52958e-08	1.94884e-06	down
CmoCh12G009070	0.311555	-1.68244	2.54956e-08	1.95793e-06	down
CmoCh14G001120	0.253219	-1.98154	2.57833e-08	1.9737e-06	down
CmoCh01G004910	0.376981	-1.40743	2.59522e-08	1.9803e-06	down
CmoCh15G008860	0.092081	-3.44095	2.63824e-08	2.00673e-06	down
CmoCh12G000160	0.371519	-1.42849	2.6468e-08	2.00688e-06	down
CmoCh10G007450	0.37721	-1.40656	2.74312e-08	2.07335e-06	down
CmoCh17G008480	2.73553	1.45182	2.8037e-08	2.11073e-06	up
CmoCh03G005220	2.20128	1.13834	2.81019e-08	2.11073e-06	up
CmoCh14G001290	0.0465671	-4.42455	2.87129e-08	2.14988e-06	down
CmoCh09G011180	0.352311	-1.50508	2.91166e-08	2.17331e-06	down
CmoCh11G018080	0.306697	-1.70511	2.94136e-08	2.18866e-06	down
CmoCh13G010150	0.250928	-1.99466	3.0199e-08	2.24015e-06	down
CmoCh02G008930	2.24969	1.16973	3.03604e-08	2.24517e-06	up
CmoCh17G005880	3.71376	1.89288	3.05508e-08	2.24811e-06	up
CmoCh10G004390	0.324469	-1.62385	3.05878e-08	2.24811e-06	down
CmoCh13G006180	0.167457	-2.57814	3.07518e-08	2.25325e-06	down
CmoCh06G008170	2.22668	1.15489	3.12092e-08	2.2798e-06	up
CmoCh03G007250	2.25711	1.17448	3.19308e-08	2.32542e-06	up
CmoCh02G013830	0.391029	-1.35465	3.3343e-08	2.4209e-06	down
CmoCh14G014390	0.33192	-1.59109	3.46046e-08	2.50492e-06	down
CmoCh14G015180	2.08894	1.06277	3.50287e-08	2.52797e-06	up
CmoCh03G012440	0.127646	-2.96978	3.6102e-08	2.59761e-06	down
CmoCh02G009890	3.42315	1.77532	3.66038e-08	2.62481e-06	up
CmoCh06G010910	0.331306	-1.59376	3.66991e-08	2.62481e-06	down
CmoCh01G016510	2.36114	1.23948	3.75757e-08	2.67951e-06	up
CmoCh01G016130	0.185935	-2.42713	3.81671e-08	2.7136e-06	down
CmoCh03G014760	0.244134	-2.03425	3.86583e-08	2.74039e-06	down
CmoCh01G001370	0.337259	-1.56807	3.94744e-08	2.78999e-06	down
CmoCh03G003640	0.0339317	-4.88122	4.39879e-08	3.09985e-06	down
CmoCh10G002110	2.24951	1.16961	4.57998e-08	3.21807e-06	up
CmoCh00G000170	0.325934	-1.61735	4.69033e-08	3.28597e-06	down
CmoCh03G009560	4.61079	2.20501	4.7422e-08	3.31263e-06	up
CmoCh02G002010	2.69654	1.43111	4.86284e-08	3.38702e-06	up
CmoCh14G021180	0.284628	-1.81285	4.91546e-08	3.41375e-06	down
CmoCh19G006600	2.06629	1.04704	4.96785e-08	3.44017e-06	up
CmoCh01G012070	0.382767	-1.38546	5.01955e-08	3.46595e-06	down
CmoCh12G009010	2.81374	1.49249	5.03658e-08	3.46772e-06	up
CmoCh17G004460	0.338182	-1.56413	5.18459e-08	3.55939e-06	down
CmoCh06G005390	0.145085	-2.78503	5.21853e-08	3.57245e-06	down
CmoCh07G004400	3.57637	1.8385	6.03605e-08	4.10863e-06	up
CmoCh07G002830	0.112282	-3.15481	6.32001e-08	4.28973e-06	down
CmoCh09G010620	8.38279	3.06743	6.33801e-08	4.28979e-06	up
CmoCh20G009130	0.0264179	-5.24234	6.39327e-08	4.30824e-06	down
CmoCh08G005960	6.97853e-05	-13.8067	6.40122e-08	4.30824e-06	down
CmoCh09G001590	0.385628	-1.37472	6.45108e-08	4.32963e-06	down
CmoCh13G008330	2.11296	1.07926	6.49564e-08	4.34736e-06	up
CmoCh04G015620	0.292817	-1.77193	6.74417e-08	4.49773e-06	down
CmoCh02G005640	0.349887	-1.51504	6.75786e-08	4.49773e-06	down
CmoCh04G021220	0.0984228	-3.34486	6.81584e-08	4.51758e-06	down
CmoCh14G018410	3.40392	1.7672	6.82539e-08	4.51758e-06	up
CmoCh20G001820	0.0798756	-3.6461	6.93692e-08	4.57875e-06	down
CmoCh01G012990	0.247927	-2.01201	7.11107e-08	4.6808e-06	down
CmoCh15G013670	0.37585	-1.41177	7.42883e-08	4.87657e-06	down
CmoCh05G000200	4.01197	2.00431	7.65529e-08	5.0115e-06	up
CmoCh05G009640	2.96439	1.56774	7.83162e-08	5.11296e-06	up
CmoCh14G002390	0.234419	-2.09284	7.97711e-08	5.19379e-06	down
CmoCh11G016400	0.386653	-1.37089	8.26847e-08	5.36891e-06	down
CmoCh08G010850	0.277551	-1.84918	8.36482e-08	5.41679e-06	down
CmoCh11G015750	0.292335	-1.77431	8.56901e-08	5.53406e-06	down
CmoCh15G009250	0.393533	-1.34544	8.83265e-08	5.67374e-06	down
CmoCh20G002150	2.68391	1.42434	9.13819e-08	5.85431e-06	up
CmoCh01G012220	2.53438	1.34163	9.17791e-08	5.86407e-06	up
CmoCh15G001250	0.241778	-2.04825	9.36453e-08	5.95283e-06	down
CmoCh05G012750	0.1301	-2.94231	9.36651e-08	5.95283e-06	down
CmoCh07G008200	0.192837	-2.37455	9.77243e-08	6.19437e-06	down
CmoCh16G005770	2.45874	1.29792	9.93002e-08	6.25213e-06	up
CmoCh04G010550	0.0250206	-5.32074	9.94183e-08	6.25213e-06	down
CmoCh19G000940	0.139926	-2.83727	1.0131e-07	6.35444e-06	down
CmoCh15G001740	0.211595	-2.24063	1.01862e-07	6.37234e-06	down
CmoCh04G021510	0.213742	-2.22605	1.0607e-07	6.61835e-06	down
CmoCh09G009700	2.06768	1.04801	1.07889e-07	6.71433e-06	up
CmoCh04G029400	0.0640293	-3.96512	1.08409e-07	6.72922e-06	down
CmoCh11G004750	2.39016	1.25711	1.08962e-07	6.74606e-06	up
CmoCh18G011590	0.156884	-2.67223	1.12863e-07	6.96959e-06	down
CmoCh17G000290	0.195802	-2.35253	1.19108e-07	7.33634e-06	down
CmoCh02G017050	0.411261	-1.28188	1.21321e-07	7.45344e-06	down
CmoCh13G011790	2.50844	1.32679	1.27356e-07	7.78431e-06	up
CmoCh19G007850	6.08664	2.60565	1.28935e-07	7.86077e-06	up
CmoCh07G013240	2.03123	1.02236	1.30839e-07	7.95659e-06	up
CmoCh18G010080	2.41492	1.27198	1.3202e-07	8.00807e-06	up
CmoCh08G010060	0.208777	-2.25997	1.39172e-07	8.39938e-06	down
CmoCh06G017410	0.21545	-2.21458	1.40757e-07	8.47374e-06	down
CmoCh14G021710	0.143704	-2.79883	1.42336e-07	8.54727e-06	down
CmoCh04G001530	0.416612	-1.26322	1.43911e-07	8.60514e-06	down
CmoCh11G000890	2.05441	1.03872	1.44018e-07	8.60514e-06	up
CmoCh11G016250	2.65593	1.40922	1.45912e-07	8.69664e-06	up
CmoCh08G004530	0.027186	-5.20099	1.57262e-07	9.34986e-06	down
CmoCh03G002080	0.346356	-1.52967	1.61842e-07	9.59834e-06	down
CmoCh14G020130	2.90311	1.5376	1.63419e-07	9.66796e-06	up
CmoCh06G007390	9.45362e-06	-16.6907	1.67151e-07	9.86437e-06	down
CmoCh18G000220	0.333599	-1.58381	1.67625e-07	9.86802e-06	down
CmoCh02G006870	2.08774	1.06194	1.72821e-07	1.0149e-05	up
CmoCh13G001130	0.366583	-1.44779	1.76225e-07	1.03017e-05	down
CmoCh02G005830	3.49447	1.80507	1.76281e-07	1.03017e-05	up
CmoCh12G004140	0.239041	-2.06467	1.77144e-07	1.03269e-05	down
CmoCh04G014440	0.357234	-1.48506	1.81916e-07	1.05465e-05	down
CmoCh04G002180	2.24666	1.16778	1.82275e-07	1.05465e-05	up
CmoCh11G011740	0.125431	-2.99504	1.82671e-07	1.05465e-05	down
CmoCh10G003810	2.15269	1.10614	1.83717e-07	1.05814e-05	up
CmoCh11G007950	0.409191	-1.28915	1.8576e-07	1.06734e-05	down
CmoCh20G007090	0.150483	-2.73232	1.87094e-07	1.07243e-05	down
CmoCh14G014290	0.0995869	-3.3279	1.90254e-07	1.08794e-05	down
CmoCh13G006370	0.21469	-2.21968	1.98461e-07	1.13217e-05	down
CmoCh09G005750	0.302001	-1.72737	2.08786e-07	1.18824e-05	down
CmoCh15G012530	0.382566	-1.38622	2.10506e-07	1.19519e-05	down
CmoCh13G010270	0.287411	-1.79881	2.15981e-07	1.22338e-05	down
CmoCh14G003440	0.109459	-3.19154	2.18819e-07	1.23654e-05	down
CmoCh06G003640	2.96016	1.56567	2.22137e-07	1.25233e-05	up
CmoCh17G002150	0.406162	-1.29987	2.22756e-07	1.25287e-05	down
CmoCh15G009830	4.53127	2.17992	2.27144e-07	1.27456e-05	up
CmoCh04G004270	0.155564	-2.68442	2.31032e-07	1.28882e-05	down
CmoCh20G002780	0.250353	-1.99797	2.313e-07	1.28882e-05	down
CmoCh04G023950	0.220814	-2.1791	2.31845e-07	1.28886e-05	down
CmoCh07G000050	0.342321	-1.54658	2.32414e-07	1.28904e-05	down
CmoCh18G012170	0.403435	-1.30959	2.36209e-07	1.30706e-05	down
CmoCh01G019060	0.412071	-1.27903	2.37743e-07	1.31252e-05	down
CmoCh14G004900	2.66477	1.41401	2.38505e-07	1.3137e-05	up
CmoCh01G014330	2.28365	1.19134	2.4238e-07	1.33198e-05	up
CmoCh19G000520	2.11608	1.08139	2.47104e-07	1.35174e-05	up
CmoCh01G000930	2.72136	1.44433	2.48128e-07	1.35425e-05	up
CmoCh14G005810	2.1013	1.07128	2.5907e-07	1.40901e-05	up
CmoCh08G005940	0.0999986	-3.32195	2.59337e-07	1.40901e-05	down
CmoCh16G007030	0.382651	-1.3859	2.63229e-07	1.42692e-05	down
CmoCh05G005970	0.402899	-1.31151	2.66085e-07	1.43869e-05	down
CmoCh19G006220	0.232019	-2.10769	2.66602e-07	1.43869e-05	down
CmoCh19G009560	2.09576	1.06748	2.6908e-07	1.4488e-05	up
CmoCh03G003790	0.166377	-2.58747	2.75198e-07	1.47842e-05	down
CmoCh01G016560	2.07291	1.05166	2.77282e-07	1.48439e-05	up
CmoCh04G017930	2.12898	1.09016	2.77548e-07	1.48439e-05	up
CmoCh01G002050	2.08727	1.06162	2.80159e-07	1.49331e-05	up
CmoCh02G016390	2.05256	1.03743	2.81039e-07	1.49331e-05	up
CmoCh12G002240	2.22213	1.15194	2.81087e-07	1.49331e-05	up
CmoCh14G021680	0.378461	-1.40178	2.83512e-07	1.50287e-05	down
CmoCh03G002930	0.313552	-1.67322	2.91337e-07	1.54093e-05	down
CmoCh07G002480	4.30686	2.10664	2.92066e-07	1.54139e-05	up
CmoCh18G009190	2.00225	1.00162	2.96806e-07	1.55774e-05	up
CmoCh03G005880	0.308444	-1.69692	2.97115e-07	1.55774e-05	down
CmoCh10G002690	2.02632	1.01886	2.99739e-07	1.56807e-05	up
CmoCh05G011650	0.1287	-2.95792	3.01634e-07	1.57454e-05	down
CmoCh09G008120	0.23402	-2.09529	3.04748e-07	1.58734e-05	down
CmoCh13G007730	2.07813	1.05528	3.20495e-07	1.66103e-05	up
CmoCh03G013760	2.10553	1.07419	3.21603e-07	1.66103e-05	up
CmoCh02G009150	0.16625	-2.58857	3.21668e-07	1.66103e-05	down
CmoCh01G013640	0.244999	-2.02915	3.29335e-07	1.69332e-05	down
CmoCh12G010000	0.199893	-2.3227	3.38357e-07	1.73598e-05	down
CmoCh18G008900	3.10628	1.63519	3.45019e-07	1.76638e-05	up
CmoCh06G009320	2.6264	1.39309	3.4785e-07	1.77708e-05	up
CmoCh04G029100	0.454788	-1.13673	3.51337e-07	1.79107e-05	down
CmoCh06G006210	0.302339	-1.72576	3.52818e-07	1.7948e-05	down
CmoCh14G007170	2.60622	1.38196	3.55534e-07	1.80478e-05	up
CmoCh18G011420	0.324042	-1.62575	3.56396e-07	1.80534e-05	down
CmoCh08G003460	0.192924	-2.3739	3.63011e-07	1.83497e-05	down
CmoCh14G016910	0.133702	-2.90291	3.66688e-07	1.84965e-05	down
CmoCh05G004220	5.19453	2.37699	3.75637e-07	1.88685e-05	up
CmoCh09G001850	3.97443	1.99075	3.812e-07	1.90778e-05	up
CmoCh06G010180	0.355146	-1.49352	3.81398e-07	1.90778e-05	down
CmoCh12G012600	0.347101	-1.52657	3.91533e-07	1.95152e-05	down
CmoCh01G002950	2.11437	1.08023	3.91811e-07	1.95152e-05	up
CmoCh09G010640	6.38246	2.67411	4.02908e-07	1.99869e-05	up
CmoCh11G000300	0.354414	-1.49649	4.0513e-07	2.00556e-05	down
CmoCh14G005990	0.17914	-2.48084	4.31321e-07	2.13082e-05	down
CmoCh06G007600	0.248956	-2.00604	4.34468e-07	2.14195e-05	down
CmoCh13G007990	0.369929	-1.43468	4.39778e-07	2.16367e-05	down
CmoCh18G003080	2.19532	1.13443	4.56489e-07	2.24129e-05	up
CmoCh12G000360	2.11065	1.07769	4.57739e-07	2.24283e-05	up
CmoCh01G020210	0.428917	-1.22123	4.68756e-07	2.28745e-05	down
CmoCh06G005120	0.343002	-1.54371	4.70641e-07	2.29198e-05	down
CmoCh06G007980	0.100058	-3.32109	4.72999e-07	2.29879e-05	down
CmoCh16G003240	0.373282	-1.42166	4.87473e-07	2.36434e-05	down
CmoCh15G006970	0.15842	-2.65817	4.98817e-07	2.41448e-05	down
CmoCh04G015850	0.15376	-2.70125	5.01713e-07	2.4236e-05	down
CmoCh15G007860	64823.6	15.9842	5.03183e-07	2.42581e-05	up
CmoCh07G010930	2.19549	1.13454	5.08906e-07	2.44847e-05	up
CmoCh19G005810	0.171204	-2.54621	5.19042e-07	2.49223e-05	down
CmoCh12G005510	0.362303	-1.46473	5.34351e-07	2.55117e-05	down
CmoCh10G008700	0.447969	-1.15853	5.34455e-07	2.55117e-05	down
CmoCh12G003530	0.414318	-1.27119	5.34511e-07	2.55117e-05	down
CmoCh04G009080	0.202106	-2.30682	5.39952e-07	2.57202e-05	down
CmoCh08G004900	0.235604	-2.08556	5.4755e-07	2.60304e-05	down
CmoCh06G009360	0.377925	-1.40383	5.53087e-07	2.62415e-05	down
CmoCh20G009360	2.52731	1.3376	5.55569e-07	2.63072e-05	up
CmoCh15G007970	0.34804	-1.52268	5.94039e-07	2.80495e-05	down
CmoCh03G002870	0.222283	-2.16953	5.94705e-07	2.80495e-05	down
CmoCh05G007270	14.9691	3.90392	6.07562e-07	2.85996e-05	up
CmoCh11G002310	2.27207	1.18401	6.12867e-07	2.87927e-05	up
CmoCh04G000840	2.76867	1.46919	6.38317e-07	2.9755e-05	up
CmoCh04G003800	0.286594	-1.80292	6.61735e-07	3.07653e-05	down
CmoCh18G000300	2.94258	1.55708	6.62559e-07	3.07653e-05	up
CmoCh01G007830	2.07654	1.05418	6.6699e-07	3.09112e-05	up
CmoCh01G018230	0.221303	-2.17591	6.76469e-07	3.12297e-05	down
CmoCh06G016580	2.10312	1.07253	6.78629e-07	3.12691e-05	up
CmoCh05G005180	0.254069	-1.97671	6.80763e-07	3.13073e-05	down
CmoCh17G009200	2.01006	1.00724	6.86225e-07	3.1498e-05	up
CmoCh07G008390	0.413402	-1.27438	6.9636e-07	3.19021e-05	down
CmoCh20G009810	0.388522	-1.36393	7.36563e-07	3.3671e-05	down
CmoCh04G010240	6.19679e-05	-13.9781	7.37783e-07	3.3671e-05	down
CmoCh10G002810	2.08159	1.05768	7.39404e-07	3.36808e-05	up
CmoCh12G005690	2.07451	1.05277	7.48937e-07	3.40504e-05	up
CmoCh18G003540	0.365537	-1.45191	7.60733e-07	3.45211e-05	down
CmoCh02G014990	0.408552	-1.29141	7.63494e-07	3.45809e-05	down
CmoCh05G009990	2.23309e-05	-15.4506	7.79061e-07	3.52194e-05	down
CmoCh18G002650	0.380883	-1.39258	7.9344e-07	3.57346e-05	down
CmoCh05G013100	0.219439	-2.18811	7.99109e-07	3.59224e-05	down
CmoCh05G001270	2.10792	1.07582	8.09208e-07	3.62637e-05	up
CmoCh11G020100	0.115979	-3.10807	8.09727e-07	3.62637e-05	down
CmoCh11G006450	2.52439	1.33594	8.13127e-07	3.6348e-05	up
CmoCh11G019840	2.37843	1.25001	8.1972e-07	3.65745e-05	up
CmoCh07G002080	0.148316	-2.75325	8.37223e-07	3.7286e-05	down
CmoCh04G002030	8.64073	3.11115	8.4467e-07	3.75479e-05	up
CmoCh15G008530	2.14711	1.10239	8.48449e-07	3.7646e-05	up
CmoCh09G001110	0.367037	-1.446	8.51089e-07	3.76933e-05	down
CmoCh16G004500	0.43111	-1.21387	8.63491e-07	3.8172e-05	down
CmoCh19G008340	0.276228	-1.85607	8.75389e-07	3.86268e-05	down
CmoCh18G012930	0.396681	-1.33395	8.79572e-07	3.86848e-05	down
CmoCh16G001900	0.333707	-1.58335	8.79933e-07	3.86848e-05	down
CmoCh11G020450	0.39688	-1.33322	8.85623e-07	3.8843e-05	down
CmoCh11G002120	0.175661	-2.50913	8.86775e-07	3.8843e-05	down
CmoCh04G006590	2.00523	1.00377	8.88944e-07	3.8867e-05	up
CmoCh17G009920	0.229384	-2.12416	8.91177e-07	3.88936e-05	down
CmoCh20G007050	0.21478	-2.21907	9.48121e-07	4.10357e-05	down
CmoCh01G003110	0.338552	-1.56255	9.48823e-07	4.10357e-05	down
CmoCh07G013670	0.369867	-1.43492	9.50818e-07	4.10479e-05	down
CmoCh15G006810	0.417769	-1.25922	9.79887e-07	4.22268e-05	down
CmoCh01G011200	0.358894	-1.47837	9.90209e-07	4.2595e-05	down
CmoCh16G008030	2.13653	1.09527	1.00634e-06	4.32112e-05	up
CmoCh16G012310	0.233802	-2.09664	1.00905e-06	4.32503e-05	down
CmoCh04G009010	2.07429	1.05262	1.03655e-06	4.43495e-05	up
CmoCh20G006010	9.3544	3.22565	1.04333e-06	4.45602e-05	up
CmoCh04G010400	0.306611	-1.70552	1.06201e-06	4.5277e-05	down
CmoCh13G008810	2.00441	1.00317	1.06989e-06	4.55322e-05	up
CmoCh18G000430	2.16273	1.11285	1.07229e-06	4.55534e-05	up
CmoCh15G007600	0.340685	-1.55349	1.07533e-06	4.56018e-05	down
CmoCh04G031160	0.388727	-1.36317	1.08177e-06	4.57673e-05	down
CmoCh06G011420	2.03628	1.02594	1.08306e-06	4.57673e-05	up
CmoCh11G015150	2.41832	1.274	1.09921e-06	4.6368e-05	up
CmoCh04G027910	0.190609	-2.39131	1.10242e-06	4.64218e-05	down
CmoCh12G012770	2.04887	1.03483	1.12675e-06	4.72799e-05	up
CmoCh20G009010	0.205401	-2.28348	1.12931e-06	4.73048e-05	down
CmoCh01G016870	0.406944	-1.2971	1.13307e-06	4.73795e-05	down
CmoCh04G018710	3.40881	1.76927	1.14515e-06	4.7718e-05	up
CmoCh16G011440	4.05	2.01792	1.16412e-06	4.84241e-05	up
CmoCh11G008770	2.00323	1.00233	1.17649e-06	4.8854e-05	up
CmoCh15G015100	0.434695	-1.20192	1.19009e-06	4.9333e-05	down
CmoCh18G009710	0.386252	-1.37238	1.21946e-06	5.03765e-05	down
CmoCh07G011050	0.123644	-3.01573	1.23737e-06	5.10282e-05	down
CmoCh03G010860	2.11917	1.0835	1.24335e-06	5.11867e-05	up
CmoCh13G011730	2.23033	1.15726	1.24794e-06	5.12876e-05	up
CmoCh01G016500	3.82626	1.93594	1.26867e-06	5.20504e-05	up
CmoCh07G011900	0.415944	-1.26554	1.30933e-06	5.33529e-05	down
CmoCh11G019740	2.52473	1.33613	1.31292e-06	5.34083e-05	up
CmoCh17G006110	2.27518	1.18598	1.35408e-06	5.49894e-05	up
CmoCh18G003990	3.06111	1.61405	1.37231e-06	5.56355e-05	up
CmoCh06G016610	3.28617	1.7164	1.39899e-06	5.65257e-05	up
CmoCh03G002400	2.22466	1.15358	1.40815e-06	5.68003e-05	up
CmoCh07G011720	0.371499	-1.42857	1.41424e-06	5.69498e-05	down
CmoCh04G015390	0.450728	-1.14967	1.4301e-06	5.7492e-05	down
CmoCh02G010190	0.159258	-2.65057	1.44542e-06	5.78877e-05	down
CmoCh11G006670	2.08174	1.05779	1.44719e-06	5.78877e-05	up
CmoCh18G007710	2.52825	1.33814	1.46717e-06	5.84521e-05	up
CmoCh19G006630	2.36841	1.24392	1.47216e-06	5.84521e-05	up
CmoCh04G011850	0.391624	-1.35246	1.4735e-06	5.84521e-05	down
CmoCh15G014930	0.348856	-1.5193	1.49996e-06	5.94032e-05	down
CmoCh05G003660	0.386281	-1.37228	1.51029e-06	5.97102e-05	down
CmoCh16G007960	0.349392	-1.51708	1.52948e-06	6.00759e-05	down
CmoCh14G011320	0.444927	-1.16836	1.53804e-06	6.03135e-05	down
CmoCh11G011820	3.88526	1.95801	1.56238e-06	6.11677e-05	up
CmoCh10G000080	17.8325	4.15644	1.57569e-06	6.15883e-05	up
CmoCh06G003770	0.458835	-1.12395	1.59571e-06	6.21677e-05	down
CmoCh16G008150	0.429122	-1.22054	1.62442e-06	6.31835e-05	down
CmoCh15G010990	0.401444	-1.31673	1.66406e-06	6.46204e-05	down
CmoCh14G010920	2.22065	1.15098	1.68209e-06	6.51097e-05	up
CmoCh14G022210	0.348692	-1.51998	1.68917e-06	6.52782e-05	down
CmoCh20G006690	0.418	-1.25843	1.69688e-06	6.54707e-05	down
CmoCh01G018910	0.345744	-1.53222	1.70884e-06	6.58259e-05	down
CmoCh01G009610	0.371056	-1.43029	1.72076e-06	6.6179e-05	down
CmoCh14G001700	0.41469	-1.26989	1.73107e-06	6.64686e-05	down
CmoCh06G008580	2.34537	1.22982	1.74135e-06	6.67145e-05	up
CmoCh14G019240	3.20729	1.68135	1.74304e-06	6.67145e-05	up
CmoCh05G013440	2.94405	1.5578	1.77637e-06	6.78817e-05	up
CmoCh20G005720	0.427765	-1.22511	1.78361e-06	6.80496e-05	down
CmoCh10G005360	6.12617	2.61499	1.78644e-06	6.80496e-05	up
CmoCh02G009180	2.26874	1.18189	1.81402e-06	6.89905e-05	up
CmoCh06G012430	2.06553	1.04651	1.83363e-06	6.95355e-05	up
CmoCh09G000090	0.433248	-1.20673	1.85303e-06	7.00293e-05	down
CmoCh11G016140	2.40004	1.26306	1.85968e-06	7.01699e-05	up
CmoCh01G003880	0.432883	-1.20795	1.8739e-06	7.04575e-05	down
CmoCh14G001860	0.221509	-2.17456	1.87428e-06	7.04575e-05	down
CmoCh05G001780	0.331867	-1.59132	1.87612e-06	7.04575e-05	down
CmoCh01G013950	2.08585	1.06064	1.93679e-06	7.26222e-05	up
CmoCh11G001460	2.88676	1.52945	1.94551e-06	7.28349e-05	up
CmoCh11G019820	2.36285	1.24053	1.95766e-06	7.31755e-05	up
CmoCh06G016620	2.82431	1.4979	1.9672e-06	7.34175e-05	up
CmoCh20G009600	0.383949	-1.38101	2.00037e-06	7.45395e-05	down
CmoCh12G005850	2.07654	1.05418	2.01642e-06	7.5021e-05	up
CmoCh01G019800	2.56562	1.35931	2.0237e-06	7.51751e-05	up
CmoCh08G001200	0.442923	-1.17487	2.03436e-06	7.53755e-05	down
CmoCh11G012120	0.192729	-2.37536	2.03612e-06	7.53755e-05	down
CmoCh11G006580	0.336292	-1.57221	2.03854e-06	7.53755e-05	down
CmoCh20G005270	0.0983961	-3.34525	2.04998e-06	7.56734e-05	down
CmoCh01G000980	0.210223	-2.25001	2.05323e-06	7.56734e-05	down
CmoCh18G006270	0.276523	-1.85453	2.05607e-06	7.56734e-05	down
CmoCh01G005130	0.448572	-1.15659	2.07451e-06	7.62352e-05	down
CmoCh17G001190	0.41224	-1.27844	2.13705e-06	7.81736e-05	down
CmoCh06G011040	0.431629	-1.21214	2.15202e-06	7.86014e-05	down
CmoCh06G007080	0.301483	-1.72985	2.15926e-06	7.87455e-05	down
CmoCh08G009370	0.129945	-2.94403	2.19692e-06	7.99973e-05	down
CmoCh10G006380	2.03154	1.02258	2.23664e-06	8.13199e-05	up
CmoCh05G001690	0.34992	-1.5149	2.26589e-06	8.22587e-05	down
CmoCh02G012850	0.0412013	-4.60117	2.29116e-06	8.30503e-05	down
CmoCh09G011240	3.56241	1.83285	2.31696e-06	8.38587e-05	up
CmoCh19G007530	0.285315	-1.80937	2.37254e-06	8.57408e-05	down
CmoCh20G008120	0.402799	-1.31187	2.42726e-06	8.75861e-05	down
CmoCh14G005550	0.0476576	-4.39115	2.44183e-06	8.79788e-05	down
CmoCh14G005310	0.355867	-1.49059	2.44549e-06	8.79788e-05	down
CmoCh04G011590	0.25661	-1.96235	2.48524e-06	8.91412e-05	down
CmoCh09G000580	2.06038	1.04291	2.49034e-06	8.91908e-05	up
CmoCh19G008660	0.358954	-1.47813	2.50686e-06	8.94905e-05	down
CmoCh09G010960	0.275372	-1.86055	2.50992e-06	8.94905e-05	down
CmoCh08G008250	0.251666	-1.99042	2.55343e-06	9.09066e-05	down
CmoCh04G019620	0.456688	-1.13072	2.57426e-06	9.15122e-05	down
CmoCh04G024720	2.17918	1.12379	2.5843e-06	9.17332e-05	up
CmoCh04G026990	0.229971	-2.12048	2.62264e-06	9.29564e-05	down
CmoCh05G001750	0.308202	-1.69805	2.62723e-06	9.29814e-05	down
CmoCh18G011190	3.07052	1.61848	2.63605e-06	9.31561e-05	up
CmoCh05G012300	2.25395	1.17246	2.65886e-06	9.38239e-05	up
CmoCh03G012080	2.23308	1.15903	2.66826e-06	9.4017e-05	up
CmoCh09G012470	0.283633	-1.8179	2.70877e-06	9.53043e-05	down
CmoCh04G030490	0.293552	-1.76831	2.73541e-06	9.59596e-05	down
CmoCh06G011660	0.366124	-1.4496	2.75985e-06	9.65342e-05	down
CmoCh05G003240	0.188025	-2.411	2.80624e-06	9.80139e-05	down
CmoCh03G007820	0.433693	-1.20525	2.85718e-06	9.96479e-05	down
CmoCh06G015430	0.334224	-1.58111	2.86605e-06	9.98117e-05	down
CmoCh08G005380	0.273802	-1.86879	2.88741e-06	0.00010041	down
CmoCh01G001530	2.77287	1.47138	2.92707e-06	0.000101641	up
CmoCh08G012430	0.439109	-1.18735	2.98662e-06	0.00010326	down
CmoCh03G001830	2.68086	1.4227	3.0544e-06	0.0001053	up
CmoCh14G015900	2.25512	1.17321	3.16611e-06	0.000108838	up
CmoCh04G028840	0.0512652	-4.28588	3.17531e-06	0.000108914	down
CmoCh20G008110	0.25462	-1.97358	3.20412e-06	0.000109672	down
CmoCh05G005280	0.383956	-1.38099	3.23646e-06	0.000110621	down
CmoCh06G011100	4.0919	2.03277	3.25769e-06	0.000111188	up
CmoCh05G006450	2.5295	1.33885	3.2843e-06	0.000111661	up
CmoCh03G012940	3.85368	1.94624	3.28533e-06	0.000111661	up
CmoCh16G000280	3.12922	1.64581	3.28552e-06	0.000111661	up
CmoCh19G001480	0.385302	-1.37594	3.34373e-06	0.000113358	down
CmoCh15G013930	0.0777044	-3.68586	3.34491e-06	0.000113358	down
CmoCh06G007640	0.230026	-2.12013	3.35684e-06	0.000113601	down
CmoCh06G015590	2.24585	1.16726	3.37208e-06	0.000113956	up
CmoCh04G024670	0.322164	-1.63413	3.40077e-06	0.000114603	down
CmoCh05G001440	2.13967	1.09739	3.51314e-06	0.000117892	up
CmoCh14G021940	2.92839	1.55011	3.62264e-06	0.000121396	up
CmoCh14G000620	2.31864	1.21328	3.62951e-06	0.000121457	up
CmoCh17G009290	4.32278	2.11196	3.64524e-06	0.000121813	up
CmoCh05G007150	0.0999568	-3.32255	3.70161e-06	0.000123525	down
CmoCh01G008480	0.43773	-1.19189	3.73003e-06	0.0001243	down
CmoCh05G002250	0.144254	-2.79331	3.74863e-06	0.000124573	down
CmoCh03G003990	0.298187	-1.74571	3.75608e-06	0.000124579	down
CmoCh14G016340	0.27826	-1.84549	3.75921e-06	0.000124579	down
CmoCh18G003200	3.02951	1.59908	3.77076e-06	0.000124789	up
CmoCh12G011010	0.313068	-1.67545	3.78587e-06	0.000125117	down
CmoCh00G001780	8.70295	3.1215	3.80554e-06	0.000125593	up
CmoCh04G017270	2.23716	1.16167	3.81089e-06	0.000125597	up
CmoCh03G009180	0.15837	-2.65863	3.86002e-06	0.000127041	down
CmoCh04G030220	0.240728	-2.05452	3.90869e-06	0.000128291	down
CmoCh04G000450	10.337	3.36975	3.99398e-06	0.000130864	up
CmoCh04G023990	0.403955	-1.30773	3.998e-06	0.000130864	down
CmoCh17G009870	0.224782	-2.1534	4.09695e-06	0.000133919	down
CmoCh06G010560	2.18531	1.12783	4.20649e-06	0.000137126	up
CmoCh11G009140	0.311543	-1.6825	4.25576e-06	0.000138544	down
CmoCh11G017580	4.1993	2.07015	4.27196e-06	0.000138882	up
CmoCh10G000330	0.284095	-1.81555	4.30381e-06	0.000139555	down
CmoCh05G013870	4.11779	2.04187	4.30607e-06	0.000139555	up
CmoCh02G009510	0.0898871	-3.47574	4.31012e-06	0.000139555	down
CmoCh20G000060	3.19465	1.67566	4.33509e-06	0.000140174	up
CmoCh16G000610	2.05926	1.04212	4.38944e-06	0.00014174	up
CmoCh09G005520	0.118936	-3.07174	4.44106e-06	0.000143214	down
CmoCh16G005600	0.426128	-1.23064	4.62e-06	0.000148584	down
CmoCh11G011060	0.309651	-1.69128	4.67238e-06	0.000150067	down
CmoCh16G002260	2.61157	1.38491	4.71262e-06	0.000150955	up
CmoCh04G011380	0.451831	-1.14614	4.84634e-06	0.0001545	down
CmoCh06G017200	0.328969	-1.60398	4.85552e-06	0.0001545	down
CmoCh16G006330	2.26924	1.18221	4.85554e-06	0.0001545	up
CmoCh18G002660	0.130399	-2.93899	4.92138e-06	0.000156388	down
CmoCh14G017040	2.65825	1.41048	4.95307e-06	0.000157186	up
CmoCh11G008240	0.373001	-1.42275	4.96973e-06	0.000157506	down
CmoCh06G002300	0.267861	-1.90044	4.97707e-06	0.000157531	down
CmoCh17G010400	0.292494	-1.77352	4.98604e-06	0.000157606	down
CmoCh10G010210	0.339282	-1.55944	4.99535e-06	0.000157693	down
CmoCh04G031490	2.00902	1.00649	5.03197e-06	0.000158639	up
CmoCh04G001240	3.40754	1.76873	5.10829e-06	0.000160834	up
CmoCh20G004660	2.05446	1.03876	5.12834e-06	0.000161253	up
CmoCh16G000570	2.08081	1.05715	5.20173e-06	0.000163133	up
CmoCh11G011580	0.450389	-1.15076	5.22662e-06	0.000163699	down
CmoCh04G009830	0.404356	-1.3063	5.3022e-06	0.000165633	down
CmoCh12G005730	0.342511	-1.54578	5.36597e-06	0.000167407	down
CmoCh07G007310	0.45886	-1.12387	5.44041e-06	0.000169509	down
CmoCh05G003510	0.170286	-2.55396	5.49546e-06	0.000171002	down
CmoCh20G006590	2.81837	1.49486	5.53595e-06	0.000172038	up
CmoCh16G009070	0.417095	-1.26155	5.55776e-06	0.000172492	down
CmoCh15G010550	2.00185	1.00133	5.61284e-06	0.000173976	up
CmoCh11G010810	3.64982	1.86783	5.63469e-06	0.000174428	up
CmoCh10G001690	0.349905	-1.51496	5.66031e-06	0.000174995	down
CmoCh20G010020	2.84106	1.50643	5.68978e-06	0.000175228	up
CmoCh05G001230	2.17306	1.11973	5.77529e-06	0.000177405	up
CmoCh14G013610	0.129246	-2.95181	5.8128e-06	0.000178101	down
CmoCh20G001750	3.14869	1.65475	5.83125e-06	0.000178438	up
CmoCh04G021630	0.222457	-2.1684	5.86236e-06	0.000178933	down
CmoCh04G001230	2.90131	1.5367	6.08914e-06	0.000185382	up
CmoCh16G011460	2.42694	1.27914	6.14965e-06	0.000186987	up
CmoCh04G020540	0.482431	-1.05161	6.19469e-06	0.000188118	down
CmoCh08G004690	0.319139	-1.64774	6.25259e-06	0.000189635	down
CmoCh13G000540	0.436389	-1.19631	6.29723e-06	0.000190748	down
CmoCh01G012260	2.08314	1.05876	6.35187e-06	0.00019216	up
CmoCh10G006310	0.431152	-1.21373	6.44354e-06	0.000194442	down
CmoCh12G006870	2.67533	1.41972	6.45697e-06	0.000194603	up
CmoCh02G001480	2.17617	1.12179	6.47722e-06	0.000194968	up
CmoCh05G003810	2.21735	1.14884	6.58648e-06	0.000198008	up
CmoCh18G009210	2.00075	1.00054	6.65812e-06	0.000199411	up
CmoCh02G015550	0.468136	-1.095	6.72647e-06	0.000201206	down
CmoCh14G009300	0.311015	-1.68494	6.78691e-06	0.000202615	down
CmoCh19G010280	0.177337	-2.49543	6.79651e-06	0.000202615	down
CmoCh10G004100	2.54734	1.34899	6.79893e-06	0.000202615	up
CmoCh14G014770	2.17874	1.12349	6.81991e-06	0.000202988	up
CmoCh01G021090	0.312724	-1.67704	6.92745e-06	0.000205677	down
CmoCh01G001820	0.252432	-1.98603	6.94716e-06	0.000205822	down
CmoCh09G009400	0.275514	-1.8598	6.94951e-06	0.000205822	down
CmoCh02G010920	2.31592	1.21159	7.22964e-06	0.000213591	up
CmoCh02G003170	0.151154	-2.72591	7.48784e-06	0.000220675	down
CmoCh03G000920	0.346699	-1.52825	7.50954e-06	0.000221043	down
CmoCh14G012320	3.20199	1.67897	7.5718e-06	0.000222329	up
CmoCh14G012480	0.438384	-1.18973	7.66311e-06	0.000224207	down
CmoCh14G002520	0.341482	-1.55012	7.66385e-06	0.000224207	down
CmoCh05G012100	0.200386	-2.31915	7.82457e-06	0.000228352	down
CmoCh04G024520	0.297902	-1.74709	7.87977e-06	0.000229683	down
CmoCh13G009710	6.71639	2.74769	7.97172e-06	0.000232081	up
CmoCh12G005180	0.250059	-1.99966	8.01657e-06	0.000232821	down
CmoCh11G011090	0.444713	-1.16905	8.0331e-06	0.000233018	down
CmoCh02G009730	0.431017	-1.21418	8.0661e-06	0.000233693	down
CmoCh06G002390	2.07742	1.05479	8.1148e-06	0.000234549	up
CmoCh04G028410	3.0966	1.63068	8.11524e-06	0.000234549	up
CmoCh07G006130	3.41372	1.77135	8.12821e-06	0.000234641	up
CmoCh12G001130	0.41008	-1.28602	8.20831e-06	0.000236668	down
CmoCh07G003660	0.376088	-1.41086	8.27159e-06	0.000238206	down
CmoCh18G002530	0.457977	-1.12665	8.29228e-06	0.000238515	down
CmoCh07G006710	0.231161	-2.11303	8.32304e-06	0.000239113	down
CmoCh14G008120	0.134735	-2.8918	8.39455e-06	0.000240878	down
CmoCh05G005070	0.404133	-1.3071	8.5143e-06	0.000244022	down
CmoCh07G006580	0.482964	-1.05001	8.56884e-06	0.000244999	down
CmoCh10G010550	0.327842	-1.60893	8.58032e-06	0.000245035	down
CmoCh11G004660	0.435876	-1.19801	8.61983e-06	0.00024587	down
CmoCh20G006910	0.0387221	-4.6907	8.86314e-06	0.00025221	down
CmoCh19G006440	3.01858	1.59387	8.96645e-06	0.000254847	up
CmoCh04G005580	0.454989	-1.1361	8.98205e-06	0.000254988	down
CmoCh11G016910	2.73898	1.45364	9.04968e-06	0.000256604	up
CmoCh01G020940	0.227882	-2.13364	9.1096e-06	0.000257998	down
CmoCh07G002700	0.432849	-1.20806	9.13666e-06	0.000258458	down
CmoCh16G011150	2.19741	1.1358	9.37819e-06	0.000264666	up
CmoCh03G007050	0.0642418	-3.96034	9.40446e-06	0.000264784	down
CmoCh11G010700	0.215969	-2.2111	9.61783e-06	0.000270473	down
CmoCh14G015740	76.2728	6.2531	9.72849e-06	0.000273264	up
CmoCh14G000810	0.409599	-1.28771	9.75235e-06	0.000273614	down
CmoCh01G000970	0.442448	-1.17642	9.8588e-06	0.000276277	down
CmoCh17G004440	2.06167	1.04381	1.028e-05	0.000287408	up
CmoCh11G016020	0.443191	-1.174	1.03986e-05	0.000290386	down
CmoCh01G002170	2.53617	1.34265	1.04853e-05	0.000292124	up
CmoCh20G006410	0.362574	-1.46365	1.05623e-05	0.00029393	down
CmoCh05G013860	3.25876	1.70432	1.06189e-05	0.000295161	up
CmoCh06G017030	0.367598	-1.4438	1.08278e-05	0.00030062	down
CmoCh14G017090	0.160393	-2.64031	1.08802e-05	0.000301723	down
CmoCh18G008090	0.184908	-2.43512	1.11212e-05	0.000307695	down
CmoCh04G002100	0.200064	-2.32146	1.11982e-05	0.000308929	down
CmoCh15G008310	0.365445	-1.45227	1.12045e-05	0.000308929	down
CmoCh04G001540	0.481293	-1.05501	1.16975e-05	0.000321046	down
CmoCh16G006950	0.240888	-2.05357	1.19061e-05	0.00032565	down
CmoCh15G015200	2.09025	1.06368	1.21644e-05	0.000331929	up
CmoCh13G005230	0.454858	-1.13651	1.24173e-05	0.000337706	down
CmoCh10G002430	0.398191	-1.32847	1.24951e-05	0.000339437	down
CmoCh11G006490	0.179361	-2.47906	1.25099e-05	0.000339453	down
CmoCh11G011530	0.26046	-1.94086	1.25752e-05	0.00034084	down
CmoCh03G005620	0.419872	-1.25198	1.28357e-05	0.000347114	down
CmoCh06G002100	0.193707	-2.36806	1.28566e-05	0.000347288	down
CmoCh20G009030	0.181615	-2.46105	1.29286e-05	0.000348839	down
CmoCh12G005440	2.29586	1.19903	1.30782e-05	0.000351884	up
CmoCh01G005440	0.31381	-1.67204	1.30809e-05	0.000351884	down
CmoCh04G011170	0.436373	-1.19637	1.30855e-05	0.000351884	down
CmoCh14G012340	0.315783	-1.66299	1.31963e-05	0.00035407	down
CmoCh00G001630	5.76988	2.52854	1.32443e-05	0.000354958	up
CmoCh11G009220	2.85098	1.51146	1.3275e-05	0.000355384	up
CmoCh12G008230	0.305565	-1.71045	1.34693e-05	0.000360185	down
CmoCh09G001670	2.18308	1.12637	1.35752e-05	0.000362206	up
CmoCh14G016360	0.476473	-1.06953	1.3861e-05	0.000369422	down
CmoCh03G009740	2.75723	1.46322	1.39616e-05	0.000371434	up
CmoCh08G002460	0.351483	-1.50847	1.39675e-05	0.000371434	down
CmoCh12G001540	0.168494	-2.56923	1.42586e-05	0.000378753	down
CmoCh13G011210	0.472109	-1.08281	1.45278e-05	0.000385478	down
CmoCh18G000760	0.456503	-1.1313	1.45936e-05	0.000386796	down
CmoCh09G002740	0.357095	-1.48562	1.46612e-05	0.000387919	down
CmoCh11G014970	0.346383	-1.52956	1.46684e-05	0.000387919	down
CmoCh04G017980	0.228128	-2.13208	1.47094e-05	0.000388575	down
CmoCh18G002960	0.124725	-3.00318	1.4979e-05	0.000393527	down
CmoCh09G006300	2.22186	1.15177	1.50775e-05	0.000395681	up
CmoCh03G010270	0.261639	-1.93435	1.55114e-05	0.000405697	down
CmoCh14G015990	2.34005	1.22654	1.55269e-05	0.000405697	up
CmoCh11G019650	0.38332	-1.38338	1.55754e-05	0.000406521	down
CmoCh09G005240	0.306526	-1.70592	1.56242e-05	0.000406909	down
CmoCh01G013880	0.459941	-1.12048	1.56607e-05	0.0004071	down
CmoCh20G003270	0.4379	-1.19133	1.56656e-05	0.0004071	down
CmoCh01G003900	0.308485	-1.69673	1.57797e-05	0.000408737	down
CmoCh08G010830	0.375507	-1.41309	1.58662e-05	0.000410533	down
CmoCh11G013740	2.25633	1.17398	1.59441e-05	0.000411694	up
CmoCh19G001200	0.142487	-2.8111	1.59626e-05	0.000411694	down
CmoCh05G013850	2.87081	1.52146	1.60931e-05	0.000414613	up
CmoCh13G001640	2.05583	1.03972	1.61913e-05	0.000416249	up
CmoCh03G013120	0.212737	-2.23286	1.62513e-05	0.000417343	down
CmoCh03G006220	0.33807	-1.5646	1.63138e-05	0.0004185	down
CmoCh11G015600	0.230864	-2.11489	1.6349e-05	0.000418953	down
CmoCh04G008490	2.41124	1.26977	1.63867e-05	0.000419472	up
CmoCh04G021920	0.450973	-1.14889	1.66543e-05	0.000425413	down
CmoCh16G007900	0.239552	-2.06159	1.67184e-05	0.00042614	down
CmoCh02G008030	0.473921	-1.07728	1.67713e-05	0.000426581	down
CmoCh08G006700	0.461648	-1.11513	1.69355e-05	0.000429793	down
CmoCh03G003230	0.346241	-1.53015	1.69513e-05	0.000429793	down
CmoCh01G015720	0.217205	-2.20287	1.71966e-05	0.000435551	down
CmoCh01G000150	2.17589	1.12161	1.73073e-05	0.000437892	up
CmoCh03G002950	0.346215	-1.53026	1.75682e-05	0.000444023	down
CmoCh08G010820	0.312605	-1.67759	1.78681e-05	0.000448762	down
CmoCh11G009080	0.324044	-1.62574	1.79135e-05	0.000449431	down
CmoCh06G009380	0.418418	-1.25698	1.81858e-05	0.000455786	down
CmoCh03G008720	0.174602	-2.51786	1.83721e-05	0.000459975	down
CmoCh03G011700	0.476312	-1.07002	1.8454e-05	0.000461543	down
CmoCh17G010370	0.418609	-1.25633	1.8482e-05	0.000461762	down
CmoCh02G010360	3.79851	1.92543	1.85731e-05	0.000463543	up
CmoCh11G014290	0.294402	-1.76414	1.8592e-05	0.000463543	down
CmoCh20G010280	2.08869	1.0626	1.90287e-05	0.000473402	up
CmoCh04G015830	0.168672	-2.56771	1.90467e-05	0.000473402	down
CmoCh04G006350	2.00821	1.00591	1.90993e-05	0.000474216	up
CmoCh04G013490	2.3171	1.21232	1.93461e-05	0.000479846	up
CmoCh01G018680	3.96363	1.98682	1.95656e-05	0.000484289	up
CmoCh01G002070	0.145713	-2.7788	1.96087e-05	0.000484854	down
CmoCh01G002040	2.03097	1.02217	1.99029e-05	0.000490771	up
CmoCh16G009790	0.328404	-1.60646	1.99266e-05	0.000490771	down
CmoCh03G011490	0.135791	-2.88054	1.99299e-05	0.000490771	down
CmoCh13G010480	0.427103	-1.22734	1.99521e-05	0.000490813	down
CmoCh04G023970	0.464275	-1.10695	2.00819e-05	0.000492994	down
CmoCh20G009420	0.283792	-1.8171	2.02222e-05	0.000495931	down
CmoCh02G011030	0.485269	-1.04314	2.05946e-05	0.000504031	down
CmoCh06G001170	0.284248	-1.81478	2.066e-05	0.000505116	down
CmoCh07G008370	0.393647	-1.34502	2.06898e-05	0.00050533	down
CmoCh14G015730	103.617	6.69512	2.0841e-05	0.000507986	up
CmoCh16G004200	2.77043	1.47011	2.10187e-05	0.000511796	up
CmoCh07G000680	0.411125	-1.28235	2.10607e-05	0.000512298	down
CmoCh05G013020	2.14256	1.09934	2.14768e-05	0.000521363	up
CmoCh07G006630	0.47156	-1.08449	2.15894e-05	0.00052249	down
CmoCh04G017210	2.80516	1.48808	2.16105e-05	0.00052249	up
CmoCh13G006200	0.397161	-1.33221	2.18084e-05	0.000526546	down
CmoCh04G009640	0.354506	-1.49612	2.18316e-05	0.000526546	down
CmoCh10G009820	0.0773958	-3.6916	2.18442e-05	0.000526546	down
CmoCh02G008920	0.26921	-1.8932	2.18663e-05	0.00052655	down
CmoCh17G006190	0.46821	-1.09477	2.19145e-05	0.000527181	down
CmoCh03G012750	2.0514	1.03661	2.22005e-05	0.000533524	up
CmoCh04G009150	14.6778	3.87556	2.22788e-05	0.000534869	up
CmoCh05G002730	0.169628	-2.55955	2.24107e-05	0.000536959	down
CmoCh14G020080	0.435013	-1.20087	2.2636e-05	0.000541277	down
CmoCh01G019140	2.07767	1.05497	2.26679e-05	0.000541303	up
CmoCh02G011120	4.51866	2.1759	2.27321e-05	0.000541952	up
CmoCh07G000580	0.468028	-1.09533	2.2896e-05	0.000545051	down
CmoCh15G005110	3.28316	1.71509	2.29076e-05	0.000545051	up
CmoCh19G000060	0.377247	-1.40642	2.31253e-05	0.000549139	down
CmoCh02G007750	0.273231	-1.87181	2.3285e-05	0.000552386	down
CmoCh01G004200	2.67371	1.41884	2.33573e-05	0.000553553	up
CmoCh14G005960	2.76891	1.46932	2.34425e-05	0.000555021	up
CmoCh04G021460	0.409703	-1.28735	2.37794e-05	0.000562442	down
CmoCh01G018970	0.4467	-1.16262	2.40265e-05	0.000567168	down
CmoCh14G021730	0.461261	-1.11635	2.43842e-05	0.000573916	down
CmoCh16G013180	2.02299	1.01649	2.44705e-05	0.000575381	up
CmoCh17G001450	2.17624	1.12184	2.46221e-05	0.00057761	up
CmoCh07G009740	0.337707	-1.56615	2.46376e-05	0.00057761	down
CmoCh13G007320	2.36748	1.24335	2.47212e-05	0.000578437	up
CmoCh00G001650	4.96668	2.31228	2.51125e-05	0.000586285	up
CmoCh04G011120	2.44478	1.2897	2.513e-05	0.000586285	up
CmoCh19G003000	0.242641	-2.04311	2.52115e-05	0.000587615	down
CmoCh18G012090	0.456596	-1.13101	2.54318e-05	0.000592089	down
CmoCh03G001620	0.126347	-2.98454	2.54529e-05	0.000592089	down
CmoCh04G022280	0.0705374	-3.82547	2.54859e-05	0.000592281	down
CmoCh03G006970	0.413296	-1.27475	2.5549e-05	0.000592928	down
CmoCh18G008240	0.499752	-1.00072	2.55835e-05	0.000592928	down
CmoCh16G007390	0.384966	-1.3772	2.55879e-05	0.000592928	down
CmoCh18G000410	0.406721	-1.29789	2.57074e-05	0.00059512	down
CmoCh06G011760	3.56809	1.83515	2.63787e-05	0.000608895	up
CmoCh13G011490	0.400336	-1.32072	2.6491e-05	0.000610311	down
CmoCh14G019190	0.164456	-2.60422	2.6702e-05	0.000613992	down
CmoCh02G003650	2.50697	1.32594	2.6755e-05	0.000614621	up
CmoCh04G000670	0.234095	-2.09484	2.70199e-05	0.000620111	down
CmoCh09G010370	2.0837	1.05915	2.73052e-05	0.000625461	up
CmoCh01G004710	4.30556	2.1062	2.75039e-05	0.00062881	up
CmoCh09G002500	2.54994	1.35046	2.83297e-05	0.000645816	up
CmoCh14G010120	0.381982	-1.38842	2.83511e-05	0.000645816	down
CmoCh12G003170	2.87079	1.52145	2.83555e-05	0.000645816	up
CmoCh07G005130	2.34135	1.22734	2.84225e-05	0.000646726	up
CmoCh05G010330	3.90796	1.96642	2.84712e-05	0.000647219	up
CmoCh04G029780	0.427834	-1.22488	2.89274e-05	0.000656968	down
CmoCh05G005610	2.28306	1.19097	2.90894e-05	0.00066002	up
CmoCh09G006490	0.165607	-2.59416	2.92108e-05	0.000661522	down
CmoCh01G006110	8.51981	3.09082	2.94211e-05	0.000665656	up
CmoCh05G004880	0.486512	-1.03945	2.96332e-05	0.00066919	down
CmoCh05G009070	2.72141	1.44435	2.97089e-05	0.000669746	up
CmoCh16G002090	0.155397	-2.68597	2.97307e-05	0.000669746	down
CmoCh14G005610	0.392854	-1.34794	2.97996e-05	0.000669746	down
CmoCh14G018330	2.55873	1.35543	2.98221e-05	0.000669746	up
CmoCh16G008040	4.08604	2.0307	2.98255e-05	0.000669746	up
CmoCh02G013980	0.447737	-1.15928	2.9908e-05	0.000670969	down
CmoCh18G000420	0.377498	-1.40546	2.99945e-05	0.000671063	down
CmoCh11G009060	0.290115	-1.7853	3.00137e-05	0.000671063	down
CmoCh04G000340	0.483165	-1.04941	3.00242e-05	0.000671063	down
CmoCh17G009810	5.31972	2.41135	3.08121e-05	0.00068675	up
CmoCh12G005260	0.399352	-1.32427	3.10069e-05	0.000690214	down
CmoCh08G002480	0.491371	-1.02512	3.10251e-05	0.000690214	down
CmoCh07G008160	0.16361	-2.61167	3.10622e-05	0.000690399	down
CmoCh09G013060	0.273181	-1.87207	3.12652e-05	0.000694122	down
CmoCh11G012550	0.396203	-1.33569	3.12876e-05	0.000694122	down
CmoCh04G017050	0.36209	-1.46558	3.16169e-05	0.000699012	down
CmoCh01G000280	0.224741	-2.15367	3.16248e-05	0.000699012	down
CmoCh03G010970	0.498761	-1.00358	3.17618e-05	0.000701394	down
CmoCh09G001500	0.144993	-2.78594	3.18253e-05	0.00070215	down
CmoCh15G011480	0.216757	-2.20585	3.19916e-05	0.000704915	down
CmoCh09G002460	0.294568	-1.76333	3.20095e-05	0.000704915	down
CmoCh05G000100	0.369823	-1.43509	3.20581e-05	0.000705252	down
CmoCh05G012980	0.208936	-2.25887	3.23199e-05	0.000709794	down
CmoCh13G000200	0.430917	-1.21452	3.2393e-05	0.000710748	down
CmoCh15G010250	3.67156	1.87639	3.30115e-05	0.000723655	up
CmoCh03G011580	0.151854	-2.71925	3.30475e-05	0.000723783	down
CmoCh07G010770	0.354972	-1.49422	3.32943e-05	0.000728523	down
CmoCh01G004290	0.189924	-2.39651	3.34523e-05	0.000731311	down
CmoCh07G014050	0.423249	-1.24042	3.36722e-05	0.000735447	down
CmoCh05G008280	0.171135	-2.5468	3.38574e-05	0.000738819	down
CmoCh04G001360	2.01375	1.00988	3.4183e-05	0.000744568	up
CmoCh13G010940	0.30856	-1.69638	3.48505e-05	0.000758417	down
CmoCh15G001370	0.468457	-1.09401	3.4917e-05	0.00075869	down
CmoCh01G014620	0.355023	-1.49401	3.4958e-05	0.00075869	down
CmoCh13G006940	2.40127	1.2638	3.50545e-05	0.000759407	up
CmoCh06G009460	0.375461	-1.41327	3.52528e-05	0.000762326	down
CmoCh04G026670	0.439959	-1.18456	3.57278e-05	0.000771206	down
CmoCh03G011690	0.178787	-2.48369	3.59061e-05	0.000774356	down
CmoCh02G005060	0.392325	-1.34988	3.59938e-05	0.000774883	down
CmoCh09G010940	0.192386	-2.37793	3.59952e-05	0.000774883	down
CmoCh02G017710	0.341568	-1.54975	3.60816e-05	0.000775686	down
CmoCh19G003570	2.14839	1.10326	3.61256e-05	0.000775686	up
CmoCh09G005630	0.269057	-1.89402	3.61296e-05	0.000775686	down
CmoCh15G013480	3.23504	1.69379	3.63217e-05	0.000779112	up
CmoCh11G003230	0.492009	-1.02324	3.63542e-05	0.000779112	down
CmoCh03G003200	2.86943	1.52076	3.64593e-05	0.000780665	up
CmoCh01G008880	3.98869	1.99591	3.70659e-05	0.000792945	up
CmoCh01G012860	0.109851	-3.18637	3.71271e-05	0.000793545	down
CmoCh01G014060	2.20807	1.14279	3.75951e-05	0.000802833	up
CmoCh08G005780	3.44223	1.78334	3.78744e-05	0.000806476	up
CmoCh01G005700	0.0712493	-3.81098	3.79003e-05	0.000806476	down
CmoCh10G001640	0.179447	-2.47837	3.80119e-05	0.000808132	down
CmoCh17G009180	2.93792	1.5548	3.85376e-05	0.000817857	up
CmoCh11G000100	0.286059	-1.80562	3.86065e-05	0.000818594	down
CmoCh02G002240	2.04221	1.03013	3.87126e-05	0.000820118	up
CmoCh12G001590	0.198262	-2.33452	3.94133e-05	0.000834225	down
CmoCh11G020370	0.110137	-3.18262	3.97353e-05	0.000840298	down
CmoCh11G020080	0.211744	-2.23961	4.04203e-05	0.000851048	down
CmoCh02G008950	0.468773	-1.09304	4.05495e-05	0.000852252	down
CmoCh04G014330	2.05026	1.03581	4.10992e-05	0.000863047	up
CmoCh17G004650	0.273246	-1.87173	4.18379e-05	0.00087549	down
CmoCh03G013560	0.107	-3.22432	4.18822e-05	0.000875653	down
CmoCh07G010920	0.442667	-1.17571	4.24779e-05	0.000887332	down
CmoCh14G019150	10.04	3.32769	4.25268e-05	0.00088758	up
CmoCh15G009510	2.53534	1.34218	4.26319e-05	0.000889	up
CmoCh04G001370	0.229651	-2.12248	4.31955e-05	0.000898406	down
CmoCh01G007610	0.347788	-1.52372	4.38685e-05	0.000911614	down
CmoCh11G010350	2.25987	1.17624	4.40313e-05	0.000914203	up
CmoCh08G006170	2.60844	1.38319	4.41805e-05	0.000916507	up
CmoCh05G001560	0.22312	-2.16411	4.42965e-05	0.000918117	down
CmoCh15G013110	0.286157	-1.80512	4.46932e-05	0.000924741	down
CmoCh02G009380	0.432237	-1.2101	4.50176e-05	0.000929846	down
CmoCh09G011030	0.446061	-1.16469	4.51237e-05	0.000931236	down
CmoCh20G010740	0.304131	-1.71724	4.58808e-05	0.000945231	down
CmoCh10G001990	0.345381	-1.53374	4.62467e-05	0.000951951	down
CmoCh07G010280	0.473572	-1.07835	4.6527e-05	0.000956898	down
CmoCh20G003760	2.06513	1.04623	4.66211e-05	0.000958011	up
CmoCh01G004490	0.182276	-2.4558	4.68077e-05	0.000961022	down
CmoCh05G001840	0.474055	-1.07687	4.70848e-05	0.000965883	down
CmoCh08G009630	0.490065	-1.02896	4.72172e-05	0.000967771	down
CmoCh11G017980	0.0966202	-3.37153	4.7317e-05	0.000968987	down
CmoCh11G000340	0.185797	-2.4282	4.75318e-05	0.000972555	down
CmoCh08G010120	2.34171	1.22756	4.87134e-05	0.000995882	up
CmoCh03G008400	0.357508	-1.48395	4.88251e-05	0.000996465	down
CmoCh06G005110	0.18753	-2.41481	4.91961e-05	0.00100233	down
CmoCh06G012220	0.16255	-2.62104	4.93667e-05	0.00100495	down
CmoCh08G002290	0.467059	-1.09832	4.96939e-05	0.00101075	down
CmoCh05G007800	0.164046	-2.60783	4.97797e-05	0.00101164	down
CmoCh04G015790	13.5171	3.75672	5.00914e-05	0.00101711	up
CmoCh10G002790	0.184446	-2.43873	5.04285e-05	0.00102222	down
CmoCh03G005320	0.342816	-1.5445	5.04925e-05	0.00102265	down
CmoCh11G003170	0.273504	-1.87037	5.12679e-05	0.00103748	down
CmoCh12G013670	0.452536	-1.1439	5.16452e-05	0.00104336	down
CmoCh15G009710	0.0857765	-3.54327	5.19871e-05	0.0010488	down
CmoCh12G006860	5.81888	2.54074	5.20025e-05	0.0010488	up
CmoCh02G005160	3.12157	1.64227	5.20837e-05	0.00104956	up
CmoCh03G013850	0.38328	-1.38353	5.22294e-05	0.0010512	down
CmoCh02G007000	2.19021	1.13107	5.22955e-05	0.0010512	up
CmoCh12G005010	0.394278	-1.34272	5.22966e-05	0.0010512	down
CmoCh04G000380	0.402372	-1.3134	5.28557e-05	0.00105977	down
CmoCh14G009970	0.409659	-1.2875	5.35327e-05	0.00107244	down
CmoCh11G008790	2.0657	1.04663	5.40254e-05	0.00108051	up
CmoCh11G006900	0.226115	-2.14487	5.40876e-05	0.00108085	down
CmoCh01G015310	3.70466	1.88934	5.58943e-05	0.00111388	up
CmoCh05G008680	0.389957	-1.35861	5.59263e-05	0.00111388	down
CmoCh14G000280	0.443539	-1.17287	5.64991e-05	0.00112351	down
CmoCh11G007400	0.311729	-1.68164	5.65037e-05	0.00112351	down
CmoCh04G021550	4.09045	2.03226	5.65601e-05	0.0011237	up
CmoCh03G000800	0.0988994	-3.33789	5.66185e-05	0.00112393	down
CmoCh18G003490	4.74609	2.24674	5.67253e-05	0.00112512	up
CmoCh11G005540	0.465208	-1.10405	5.68814e-05	0.00112722	down
CmoCh03G005500	0.124522	-3.00552	5.69253e-05	0.00112722	down
CmoCh07G004010	2.80076	1.48582	5.76148e-05	0.00113993	up
CmoCh07G013420	0.476663	-1.06896	5.77802e-05	0.00114152	down
CmoCh18G011390	0.498165	-1.00531	5.82303e-05	0.00114926	down
CmoCh20G009590	0.240921	-2.05337	5.84761e-05	0.00115271	down
CmoCh02G009190	0.221992	-2.17142	5.85016e-05	0.00115271	down
CmoCh18G008160	3.34474	1.7419	5.86275e-05	0.00115424	up
CmoCh04G010000	2.35154	1.23361	5.88167e-05	0.00115607	up
CmoCh19G002190	0.247396	-2.01511	5.93536e-05	0.00116471	down
CmoCh10G007050	2.62858	1.39428	5.95223e-05	0.00116707	up
CmoCh14G018390	3.06677	1.61672	5.97602e-05	0.00117077	up
CmoCh07G011480	0.216504	-2.20754	5.98933e-05	0.00117242	down
CmoCh19G005800	0.291396	-1.77895	6.2191e-05	0.00121335	down
CmoCh02G005240	2.4086	1.2682	6.39375e-05	0.00124245	up
CmoCh10G007850	0.2327	-2.10346	6.47305e-05	0.00125377	down
CmoCh19G002550	2.16684	1.11559	6.47815e-05	0.00125377	up
CmoCh02G004640	0.42894	-1.22115	6.51456e-05	0.00125802	down
CmoCh17G008600	0.46066	-1.11823	6.51588e-05	0.00125802	down
CmoCh12G001160	0.371842	-1.42724	6.52177e-05	0.00125815	down
CmoCh20G011350	0.331726	-1.59193	6.56329e-05	0.00126412	down
CmoCh02G011160	0.157641	-2.66529	6.57278e-05	0.00126493	down
CmoCh15G006120	0.310734	-1.68625	6.60204e-05	0.00126852	down
CmoCh19G008420	0.408027	-1.29326	6.69607e-05	0.00128248	down
CmoCh18G001000	0.327701	-1.60955	6.77365e-05	0.00129423	down
CmoCh02G013350	0.407586	-1.29482	6.8276e-05	0.00130246	down
CmoCh13G003670	0.0479808	-4.3814	7.09464e-05	0.00134697	down
CmoCh01G019200	0.461616	-1.11524	7.11556e-05	0.00134987	down
CmoCh13G003650	0.375597	-1.41274	7.12831e-05	0.00135122	down
CmoCh07G011230	0.199636	-2.32456	7.16174e-05	0.00135649	down
CmoCh11G019580	0.224988	-2.15208	7.18026e-05	0.00135892	down
CmoCh01G016520	2.87313	1.52262	7.22515e-05	0.00136633	up
CmoCh09G011850	0.489397	-1.03092	7.23654e-05	0.00136651	down
CmoCh18G004030	0.467159	-1.09801	7.23749e-05	0.00136651	down
CmoCh12G005670	0.28068	-1.833	7.32261e-05	0.00137932	down
CmoCh12G004900	0.379601	-1.39744	7.37877e-05	0.00138772	down
CmoCh18G001250	0.440927	-1.18139	7.4039e-05	0.00139026	down
CmoCh07G003520	2.10203	1.07178	7.41504e-05	0.00139126	up
CmoCh07G010840	0.401925	-1.315	7.43425e-05	0.00139269	down
CmoCh13G005720	13.1653	3.71866	7.4446e-05	0.00139354	up
CmoCh20G008150	2.0991	1.06977	7.4808e-05	0.00139922	up
CmoCh13G001880	3.65885	1.87139	7.62186e-05	0.00142449	up
CmoCh16G009290	2.96704	1.56903	7.64625e-05	0.00142793	up
CmoCh02G000180	3.50945	1.81124	7.68907e-05	0.00143481	up
CmoCh09G008790	0.279253	-1.84035	7.83859e-05	0.00145931	down
CmoCh07G006610	0.317359	-1.65581	7.86048e-05	0.00146225	down
CmoCh10G004910	0.18227	-2.45585	7.88545e-05	0.00146461	down
CmoCh00G001640	4.36309	2.12535	7.90175e-05	0.001465	up
CmoCh08G006540	0.204087	-2.29274	7.91197e-05	0.001465	down
CmoCh17G007960	0.356741	-1.48705	8.01575e-05	0.00148078	down
CmoCh05G001730	0.394506	-1.34188	8.0385e-05	0.0014827	down
CmoCh15G013300	0.473282	-1.07923	8.07688e-05	0.00148863	down
CmoCh02G010330	2.62857	1.39428	8.10289e-05	0.00149228	up
CmoCh14G010700	2.12863	1.08993	8.12489e-05	0.00149518	up
CmoCh05G001640	0.292599	-1.773	8.21916e-05	0.00151021	down
CmoCh08G000770	0.278571	-1.84388	8.53838e-05	0.00156406	down
CmoCh01G008510	0.177632	-2.49304	8.62635e-05	0.00157897	down
CmoCh05G007660	2.55694	1.35442	8.6614e-05	0.00158418	up
CmoCh03G014700	0.490528	-1.02759	8.70935e-05	0.00159173	down
CmoCh11G001500	0.359087	-1.47759	8.75085e-05	0.0015967	down
CmoCh17G006760	2.1532	1.10648	8.75655e-05	0.0015967	up
CmoCh14G010780	0.327238	-1.61159	8.85446e-05	0.0016121	down
CmoCh09G004920	2.01056	1.00759	9.12208e-05	0.00165454	up
CmoCh10G011440	0.360775	-1.47083	9.16537e-05	0.00165988	down
CmoCh10G001370	0.223872	-2.15925	9.20067e-05	0.00166461	down
CmoCh05G003840	0.432648	-1.20873	9.27172e-05	0.00167534	down
CmoCh11G010440	0.449898	-1.15233	9.29552e-05	0.00167838	down
CmoCh04G007940	2.10281	1.07232	9.42834e-05	0.0016998	up
CmoCh04G026810	2.55912	1.35565	9.4956e-05	0.00171064	up
CmoCh03G004430	0.33204	-1.59057	9.56061e-05	0.00171976	down
CmoCh13G010350	0.435985	-1.19765	9.58998e-05	0.00172353	down
CmoCh04G019840	0.373604	-1.42042	9.78545e-05	0.00174709	down
CmoCh11G017560	0.263371	-1.92483	9.87408e-05	0.00176029	down
CmoCh01G007090	3.7141	1.89301	9.90996e-05	0.00176537	up
CmoCh09G005510	0.419812	-1.25218	9.93634e-05	0.00176671	down
CmoCh02G001960	0.265759	-1.91181	9.93779e-05	0.00176671	down
CmoCh01G006450	6.47033	2.69384	9.93959e-05	0.00176671	up
CmoCh14G001680	0.25162	-1.99068	9.99046e-05	0.00177444	down
CmoCh02G000010	0.460699	-1.1181	9.99908e-05	0.00177465	down
CmoCh17G005360	0.0999313	-3.32292	0.000100488	0.00178084	down
CmoCh18G009390	0.0852585	-3.55201	0.00010068	0.00178292	down
CmoCh17G007750	0.390956	-1.35492	0.000100839	0.00178441	down
CmoCh02G008300	0.394576	-1.34162	0.000101365	0.00179241	down
CmoCh16G007840	0.456433	-1.13152	0.000101949	0.0018014	down
CmoCh01G008140	0.422405	-1.2433	0.00010515	0.00185523	down
CmoCh17G011120	0.222575	-2.16764	0.000105378	0.00185787	down
CmoCh12G003150	0.0795744	-3.65155	0.000105735	0.00186195	down
CmoCh18G007960	0.174722	-2.51687	0.000105764	0.00186195	down
CmoCh15G010590	5.18711	2.37493	0.000107374	0.00188613	up
CmoCh12G006150	2.73548	1.4518	0.000107672	0.00188999	up
CmoCh02G015540	4.25725	2.08992	0.000108453	0.00190151	up
CmoCh00G000670	4.82463	2.27042	0.000108488	0.00190151	up
CmoCh04G000560	5.16344	2.36833	0.000109039	0.00190837	up
CmoCh05G006600	2.20817	1.14285	0.000110219	0.00192763	up
CmoCh18G003160	4.28496	2.09928	0.000111362	0.00194336	up
CmoCh18G000390	3.20486	1.68026	0.000113129	0.00197133	up
CmoCh04G015050	0.442876	-1.17502	0.000113887	0.00198106	down
CmoCh03G010240	0.271218	-1.88248	0.000113951	0.00198106	down
CmoCh00G001460	5.64786	2.4977	0.000114018	0.00198106	up
CmoCh02G014380	0.348501	-1.52076	0.000114614	0.00198853	down
CmoCh11G004480	0.26343	-1.92451	0.000114847	0.00199112	down
CmoCh14G011570	0.229449	-2.12376	0.000115296	0.00199747	down
CmoCh13G007600	2.27917	1.18851	0.000116358	0.0020115	up
CmoCh11G007020	3.52373	1.8171	0.000116925	0.00201694	up
CmoCh05G005890	0.254193	-1.976	0.000118507	0.00204128	down
CmoCh11G018790	0.292627	-1.77286	0.00012152	0.00209168	down
CmoCh11G020200	0.0771502	-3.69619	0.000121798	0.00209496	down
CmoCh15G001230	0.250407	-1.99765	0.000123014	0.00211107	down
CmoCh01G002350	0.223112	-2.16416	0.000123242	0.00211107	down
CmoCh20G001070	2.2287	1.1562	0.000123271	0.00211107	up
CmoCh14G005760	0.219729	-2.1862	0.000123352	0.00211107	down
CmoCh16G000660	0.0111673	-6.48457	0.000125316	0.00213582	down
CmoCh09G001010	0.414535	-1.27043	0.000125332	0.00213582	down
CmoCh07G009840	0.443945	-1.17155	0.000126315	0.00215104	down
CmoCh05G000330	2.01989	1.01428	0.000126955	0.0021604	up
CmoCh06G002520	0.247099	-2.01684	0.000127524	0.002167	down
CmoCh07G006470	0.460129	-1.11989	0.000127993	0.00217343	down
CmoCh11G004060	2.1397	1.09741	0.00012856	0.00217996	up
CmoCh06G014160	0.0946042	-3.40195	0.000129316	0.00219124	down
CmoCh08G000110	0.107877	-3.21255	0.000129465	0.00219221	down
CmoCh01G007920	0.448927	-1.15545	0.000130091	0.00219862	down
CmoCh18G011130	2.32626	1.21801	0.000130107	0.00219862	up
CmoCh18G003040	0.218976	-2.19116	0.000130769	0.00220804	down
CmoCh19G010450	2.01944	1.01396	0.000132148	0.00222663	up
CmoCh06G010190	0.409204	-1.28911	0.00013231	0.00222779	down
CmoCh19G010200	2.26855	1.18177	0.00013312	0.00223671	up
CmoCh19G010260	2.30493	1.20472	0.00013403	0.00224728	up
CmoCh14G001190	4.32887	2.11399	0.000135081	0.00226173	up
CmoCh15G010580	6.53231	2.70759	0.000135428	0.00226596	up
CmoCh04G001030	0.354751	-1.49512	0.000135851	0.0022683	down
CmoCh16G011670	2.68068	1.4226	0.000136945	0.00228497	up
CmoCh11G012590	0.414609	-1.27018	0.000137197	0.00228757	down
CmoCh01G002030	2.68669	1.42583	0.000137765	0.00229544	up
CmoCh05G004230	2.11507	1.08071	0.000138113	0.00229873	up
CmoCh04G028900	0.471774	-1.08383	0.000138154	0.00229873	down
CmoCh07G007050	0.335246	-1.57671	0.000139721	0.00232159	down
CmoCh11G014250	4.62414	2.20918	0.000140338	0.00233021	up
CmoCh13G007980	2.20104	1.13819	0.000141822	0.00234942	up
CmoCh07G008570	2.34345	1.22864	0.000141887	0.00234942	up
CmoCh11G003070	0.459941	-1.12048	0.000142129	0.0023518	down
CmoCh14G021300	0.498526	-1.00426	0.000143483	0.00237093	down
CmoCh15G012290	0.309155	-1.6936	0.00014516	0.00239419	down
CmoCh12G001150	0.256432	-1.96335	0.000145191	0.00239419	down
CmoCh06G013190	0.201176	-2.31347	0.000145462	0.00239701	down
CmoCh15G005060	0.277968	-1.84701	0.000146581	0.00241214	down
CmoCh12G000950	0.428452	-1.22279	0.000147008	0.00241535	down
CmoCh02G013920	0.484133	-1.04653	0.000147079	0.00241535	down
CmoCh04G015950	0.378107	-1.40313	0.000147755	0.00242481	down
CmoCh20G008230	2.06191	1.04398	0.00014792	0.00242585	up
CmoCh02G017520	0.428469	-1.22274	0.000149321	0.00244716	down
CmoCh09G001120	0.184927	-2.43497	0.000149627	0.00245049	down
CmoCh04G029760	0.12084	-3.04883	0.0001516	0.0024794	down
CmoCh07G013540	0.125249	-2.99713	0.00015259	0.00249219	down
CmoCh02G001870	0.105426	-3.2457	0.000152859	0.00249489	down
CmoCh02G013450	0.496498	-1.01014	0.000154054	0.00250756	down
CmoCh02G015590	4.26269	2.09177	0.000154224	0.00250863	up
CmoCh02G015930	0.292224	-1.77486	0.000154639	0.00251368	down
CmoCh18G003850	0.309181	-1.69347	0.000156511	0.00253893	down
CmoCh07G002750	0.469983	-1.08932	0.000156672	0.00253913	down
CmoCh02G012130	0.359387	-1.47639	0.000158585	0.00256563	down
CmoCh06G013740	0.419722	-1.2525	0.000158826	0.0025678	down
CmoCh03G009150	0.30408	-1.71748	0.000158995	0.0025688	down
CmoCh07G001850	0.410733	-1.28373	0.000160579	0.00259089	down
CmoCh14G020170	0.281687	-1.82783	0.000160875	0.00259233	down
CmoCh04G025820	0.25659	-1.96246	0.000160885	0.00259233	down
CmoCh08G003530	0.420999	-1.24811	0.000161956	0.00260784	down
CmoCh20G002200	0.207372	-2.26971	0.000162163	0.00260941	down
CmoCh04G019950	0.266863	-1.90583	0.000162787	0.0026177	down
CmoCh11G002370	0.134534	-2.89396	0.000165431	0.00265768	down
CmoCh12G012650	0.347397	-1.52534	0.000165854	0.00265768	down
CmoCh18G008700	0.306558	-1.70577	0.000165917	0.00265768	down
CmoCh03G013240	0.360555	-1.47171	0.000165938	0.00265768	down
CmoCh15G014910	0.372995	-1.42277	0.000166326	0.0026621	down
CmoCh19G009710	10.6526	3.41314	0.000167596	0.00267707	up
CmoCh12G012710	0.45123	-1.14807	0.000167875	0.00267974	down
CmoCh08G004380	0.273772	-1.86895	0.000168186	0.00268292	down
CmoCh16G006890	3.09432	1.62962	0.000168343	0.00268363	up
CmoCh15G014000	0.244078	-2.03459	0.000168469	0.00268386	down
CmoCh09G001230	0.367879	-1.4427	0.000169644	0.00270077	down
CmoCh05G003420	0.43773	-1.19189	0.000173191	0.00274994	down
CmoCh08G003890	2.30265	1.20329	0.000174287	0.00276513	up
CmoCh14G016920	0.231141	-2.11316	0.000174378	0.00276513	down
CmoCh09G010420	0.448182	-1.15784	0.000174613	0.00276702	down
CmoCh17G001210	0.473384	-1.07892	0.000175375	0.00277401	down
CmoCh05G010670	0.325719	-1.6183	0.000175452	0.00277401	down
CmoCh12G008210	0.438302	-1.19	0.000175517	0.00277401	down
CmoCh06G000950	0.175162	-2.51323	0.000179948	0.00283469	down
CmoCh20G004750	0.393151	-1.34684	0.000180104	0.00283528	down
CmoCh04G015290	0.214888	-2.21834	0.000183382	0.0028812	down
CmoCh15G010600	5.02236	2.32837	0.000184358	0.00289463	up
CmoCh20G011280	2.72583	1.44669	0.000184775	0.00289841	up
CmoCh01G020790	0.493576	-1.01866	0.000184959	0.00289841	down
CmoCh09G005530	4.49659	2.16883	0.000185139	0.00289841	up
CmoCh16G008610	0.320435	-1.64189	0.000185173	0.00289841	down
CmoCh16G005580	0.435822	-1.19819	0.000186141	0.00291119	down
CmoCh14G003710	0.174001	-2.52283	0.000186739	0.00291864	down
CmoCh17G006820	0.297228	-1.75036	0.000187196	0.00292387	down
CmoCh09G006310	0.39377	-1.34457	0.000187811	0.00292966	down
CmoCh18G007620	0.33027	-1.59828	0.000188388	0.00293674	down
CmoCh07G001780	8.57678	3.10044	0.000188743	0.00293846	up
CmoCh07G003280	0.483228	-1.04922	0.000189041	0.00293977	down
CmoCh04G007880	0.378903	-1.4001	0.000189073	0.00293977	down
CmoCh04G028560	0.368041	-1.44206	0.000189304	0.00294145	down
CmoCh05G010060	2.11834	1.08294	0.000190569	0.00295919	up
CmoCh14G018860	0.30481	-1.71402	0.00019188	0.00297761	down
CmoCh03G005480	0.489475	-1.03069	0.000193006	0.00299122	down
CmoCh09G002600	0.463554	-1.10919	0.000194899	0.0030147	down
CmoCh04G011250	2.95251	1.56194	0.00019578	0.00302443	up
CmoCh10G004630	0.438047	-1.19084	0.000196094	0.00302538	down
CmoCh11G005960	0.211134	-2.24377	0.000197531	0.00304559	down
CmoCh02G008290	0.469452	-1.09095	0.000199591	0.00306945	down
CmoCh13G003440	2.40743	1.26749	0.000201539	0.00309345	up
CmoCh11G006360	0.119182	-3.06876	0.000201987	0.00309835	down
CmoCh15G012690	2.27486	1.18578	0.000206385	0.00315973	up
CmoCh16G003210	0.439755	-1.18523	0.000207997	0.00318238	down
CmoCh17G011340	0.338031	-1.56477	0.000208317	0.00318525	down
CmoCh14G007950	2.0345	1.02467	0.000209298	0.00319616	up
CmoCh09G010490	0.456385	-1.13168	0.000210441	0.00320953	down
CmoCh14G000030	5.20862	2.3809	0.000210929	0.00321084	up
CmoCh01G016960	0.36336	-1.46053	0.00021138	0.00321566	down
CmoCh06G016590	0.248485	-2.00877	0.000212718	0.00323191	down
CmoCh06G013320	2.39242	1.25847	0.000212961	0.00323355	up
CmoCh04G003410	0.362084	-1.4656	0.000213789	0.00324407	down
CmoCh08G009680	0.470746	-1.08698	0.00021412	0.00324704	down
CmoCh07G001130	0.450041	-1.15187	0.00021857	0.00330614	down
CmoCh12G004680	0.3906	-1.35624	0.000222225	0.00334981	down
CmoCh16G009770	0.31764	-1.65453	0.000222273	0.00334981	down
CmoCh03G014420	0.487816	-1.03559	0.000222295	0.00334981	down
CmoCh12G002690	3.38857	1.76068	0.000222702	0.00335383	up
CmoCh11G002970	0.0998178	-3.32456	0.000226032	0.0033997	down
CmoCh02G013510	2.10505	1.07385	0.000228233	0.0034285	up
CmoCh15G014920	0.179288	-2.47965	0.000235371	0.00352248	down
CmoCh03G000530	0.348249	-1.52181	0.000235886	0.00352798	down
CmoCh18G013570	0.298152	-1.74588	0.000236597	0.00353558	down
CmoCh04G024530	0.408226	-1.29256	0.000236689	0.00353558	down
CmoCh12G012090	0.476816	-1.0685	0.000237187	0.00354081	down
CmoCh11G003490	0.186358	-2.42386	0.000239158	0.0035658	down
CmoCh06G001350	4.04126	2.0148	0.000241407	0.00359038	up
CmoCh02G001290	0.109471	-3.19138	0.000241726	0.00359067	down
CmoCh14G006860	0.150159	-2.73544	0.000243037	0.00360567	down
CmoCh02G016990	0.407701	-1.29442	0.00024537	0.00363804	down
CmoCh09G003110	0.409146	-1.28931	0.000246465	0.00365201	down
CmoCh19G003650	0.392812	-1.34809	0.000247135	0.00365968	down
CmoCh09G002540	0.199626	-2.32463	0.000248988	0.0036787	down
CmoCh18G012850	2.08306	1.05871	0.000249034	0.0036787	up
CmoCh17G005280	0.428468	-1.22274	0.000249645	0.00368319	down
CmoCh13G004140	0.152751	-2.71074	0.000250415	0.00369	down
CmoCh08G001510	0.250317	-1.99817	0.000251323	0.00369656	down
CmoCh16G005650	2.16344	1.11333	0.000253171	0.00371689	up
CmoCh04G029290	0.208909	-2.25906	0.000254299	0.00373118	down
CmoCh15G007840	2.25199	1.1712	0.000255871	0.00375194	up
CmoCh12G006030	0.475113	-1.07366	0.000257132	0.00376353	down
CmoCh04G030510	0.459423	-1.1221	0.000263599	0.00384643	down
CmoCh15G002110	0.491841	-1.02374	0.000265178	0.00386476	down
CmoCh14G008440	0.358884	-1.47841	0.000266141	0.00387495	down
CmoCh06G015900	0.143465	-2.80123	0.000268297	0.00389415	down
CmoCh06G004900	0.475572	-1.07226	0.000268332	0.00389415	down
CmoCh18G009250	0.357488	-1.48403	0.000269306	0.00390591	down
CmoCh16G003660	0.441551	-1.17935	0.000270206	0.0039166	down
CmoCh14G003180	0.174715	-2.51692	0.000270551	0.00391923	down
CmoCh11G004650	0.431229	-1.21347	0.000270763	0.00391992	down
CmoCh11G018550	2.09117	1.06431	0.000272129	0.00393494	up
CmoCh16G000330	2.00902	1.00649	0.00027261	0.00393874	up
CmoCh14G015150	0.240646	-2.05502	0.00027366	0.00394755	down
CmoCh04G007010	2.03018	1.02161	0.000275593	0.00397066	up
CmoCh10G007410	2.03343	1.02391	0.000276239	0.00397757	up
CmoCh03G006370	0.457334	-1.12868	0.000276697	0.00398178	down
CmoCh13G000280	0.497953	-1.00592	0.000276968	0.00398328	down
CmoCh13G009820	6.66356	2.73629	0.000281403	0.00404463	up
CmoCh05G001080	0.49372	-1.01824	0.000289941	0.00414497	down
CmoCh05G013280	2.09627	1.06782	0.000290122	0.0041451	up
CmoCh01G013770	2.03274	1.02343	0.000291464	0.00416179	up
CmoCh08G002490	0.429085	-1.22066	0.000294479	0.00419484	down
CmoCh14G001230	3.90254	1.96441	0.000295374	0.00419498	up
CmoCh13G008560	5.44765	2.44563	0.000298048	0.00422308	up
CmoCh17G011100	0.245192	-2.02801	0.000300879	0.00425565	down
CmoCh00G001770	4.31547	2.10952	0.000301289	0.00425642	up
CmoCh06G013070	0.48994	-1.02932	0.000301842	0.00426172	down
CmoCh01G009430	0.454318	-1.13823	0.000302054	0.0042622	down
CmoCh14G018650	0.173149	-2.52992	0.000303433	0.00427913	down
CmoCh04G012170	0.288116	-1.79528	0.000304236	0.00428651	down
CmoCh03G010330	0.351579	-1.50808	0.000304314	0.00428651	down
CmoCh17G000610	0.313853	-1.67184	0.000304878	0.00428942	down
CmoCh14G002570	4.41427	2.14218	0.00030629	0.00430676	up
CmoCh04G001960	3.05853	1.61284	0.000311547	0.00436275	up
CmoCh09G006880	0.338445	-1.56301	0.000314431	0.00439486	down
CmoCh13G011410	0.491112	-1.02588	0.000314436	0.00439486	down
CmoCh01G004620	0.129576	-2.94813	0.000314573	0.00439486	down
CmoCh00G000370	2.03417	1.02444	0.000319428	0.00444454	up
CmoCh13G009120	0.459051	-1.12327	0.000320121	0.00445159	down
CmoCh16G009310	4.77523	2.25557	0.000320363	0.00445175	up
CmoCh20G002240	3.36658	1.75128	0.000320504	0.00445175	up
CmoCh19G010300	3.04551	1.60668	0.000321155	0.00445562	up
CmoCh12G003190	0.317443	-1.65543	0.000323912	0.00448868	down
CmoCh20G004830	0.408013	-1.29331	0.000325378	0.00450639	down
CmoCh13G006570	0.415868	-1.2658	0.000326679	0.00451918	down
CmoCh08G004610	0.218629	-2.19344	0.000328169	0.00453718	down
CmoCh08G001640	2.04833	1.03445	0.000336222	0.00463515	up
CmoCh16G006370	0.453502	-1.14082	0.000338559	0.004662	down
CmoCh11G014950	0.243608	-2.03737	0.000340789	0.00469	down
CmoCh20G011440	0.296241	-1.75516	0.000342726	0.00471395	down
CmoCh17G006960	0.364461	-1.45616	0.000343434	0.00472099	down
CmoCh06G013940	0.222182	-2.17019	0.000344491	0.0047328	down
CmoCh10G006140	2.62516	1.39241	0.000345711	0.00474684	up
CmoCh04G004990	0.491387	-1.02507	0.000346555	0.0047557	down
CmoCh01G002460	0.318709	-1.64969	0.000347596	0.00476302	down
CmoCh13G007340	2.04598	1.03279	0.000347753	0.00476302	up
CmoCh05G001340	0.385137	-1.37656	0.000347883	0.00476302	down
CmoCh07G007370	0.433322	-1.20649	0.000352972	0.00482442	down
CmoCh03G004780	0.460752	-1.11794	0.000356026	0.00485784	down
CmoCh11G008780	2.71743	1.44224	0.000356885	0.00486679	up
CmoCh15G005410	0.439112	-1.18734	0.000358756	0.00488675	down
CmoCh11G009110	0.375611	-1.41269	0.0003599	0.00489955	down
CmoCh01G001010	0.289935	-1.7862	0.00036088	0.00490731	down
CmoCh10G011610	0.357954	-1.48215	0.000362258	0.00492325	down
CmoCh00G001000	4.99962	2.32182	0.000366359	0.00497053	up
CmoCh16G007820	0.212673	-2.23329	0.000368298	0.0049897	down
CmoCh02G005330	0.466925	-1.09874	0.000368431	0.0049897	down
CmoCh14G003760	0.498831	-1.00338	0.000369222	0.00499241	down
CmoCh06G004320	0.390017	-1.35839	0.000369837	0.0049979	down
CmoCh04G003790	2.27044	1.18297	0.000370544	0.00500415	up
CmoCh16G011930	0.394511	-1.34186	0.000370717	0.00500415	down
CmoCh02G000080	0.391372	-1.35339	0.000372162	0.00501267	down
CmoCh06G003930	2.40901	1.26844	0.000372642	0.00501602	up
CmoCh16G012110	0.220899	-2.17854	0.000372947	0.0050173	down
CmoCh02G012700	0.297662	-1.74825	0.000375575	0.00504699	down
CmoCh05G013150	0.449885	-1.15237	0.000379393	0.00509061	down
CmoCh17G002940	0.118088	-3.08207	0.000381197	0.00510341	down
CmoCh12G004100	0.380278	-1.39487	0.00038188	0.00510879	down
CmoCh05G005190	0.407992	-1.29339	0.000382176	0.0051099	down
CmoCh01G018210	0.394214	-1.34295	0.000384108	0.00513287	down
CmoCh01G011880	0.437312	-1.19326	0.000385113	0.00514342	down
CmoCh00G001620	4.81709	2.26816	0.000387843	0.00517192	up
CmoCh04G003070	0.322983	-1.63047	0.000387894	0.00517192	down
CmoCh13G009210	0.443549	-1.17284	0.000390345	0.0052017	down
CmoCh14G000370	0.26258	-1.92917	0.000391608	0.00521564	down
CmoCh06G000430	2.08452	1.05972	0.000392665	0.00522473	up
CmoCh04G028260	2.18245	1.12595	0.000392727	0.00522473	up
CmoCh09G004120	0.362757	-1.46292	0.000393879	0.00523424	down
CmoCh09G009200	2.18804	1.12964	0.000396288	0.00525751	up
CmoCh04G008000	0.397556	-1.33077	0.000396569	0.00525832	down
CmoCh11G013440	0.475064	-1.07381	0.000397535	0.00526635	down
CmoCh10G004350	0.29965	-1.73865	0.000400058	0.00529287	down
CmoCh14G009050	0.0421801	-4.56729	0.000402205	0.00531834	down
CmoCh02G008020	2.02031	1.01458	0.000402633	0.00532106	up
CmoCh11G018510	0.282292	-1.82474	0.000402857	0.00532109	down
CmoCh03G013870	0.47643	-1.06966	0.000405663	0.00535225	down
CmoCh05G002620	2.10876	1.07639	0.000407259	0.00536444	up
CmoCh15G001530	4.32152	2.11154	0.000412054	0.00542165	up
CmoCh16G004360	0.443125	-1.17421	0.000414831	0.00545376	down
CmoCh12G000550	2.29936	1.20123	0.00041495	0.00545376	up
CmoCh14G010220	0.481581	-1.05415	0.000417846	0.00548646	down
CmoCh05G010830	0.396254	-1.3355	0.000422229	0.00554031	down
CmoCh14G015770	39.6774	5.31024	0.000423224	0.00555033	up
CmoCh04G002990	2.25209	1.17126	0.000424591	0.00556521	up
CmoCh17G003320	2.21827	1.14943	0.000427257	0.00559594	up
CmoCh18G008660	2.26957	1.18242	0.000427403	0.00559594	up
CmoCh15G013220	2.20121	1.1383	0.000428266	0.00560112	up
CmoCh12G006880	3.44507	1.78453	0.00042852	0.00560139	up
CmoCh03G000030	0.472552	-1.08146	0.000431464	0.0056368	down
CmoCh02G008430	0.414963	-1.26895	0.000432591	0.00564536	down
CmoCh06G013150	0.246667	-2.01936	0.000434683	0.00566649	down
CmoCh11G002460	0.456102	-1.13257	0.000440114	0.00572172	down
CmoCh04G004840	0.260488	-1.94071	0.000440825	0.00572786	down
CmoCh11G000800	0.422385	-1.24337	0.000442256	0.00574333	down
CmoCh05G006080	0.466655	-1.09957	0.000443972	0.0057625	down
CmoCh03G001350	3.50035	1.8075	0.000446159	0.00578019	up
CmoCh05G007610	2.16038	1.11128	0.000446295	0.00578019	up
CmoCh11G020540	2.45582	1.2962	0.0004463	0.00578019	up
CmoCh13G005980	0.339781	-1.55732	0.000446703	0.00578228	down
CmoCh15G010320	0.442272	-1.17699	0.000451247	0.00583795	down
CmoCh07G005140	2.25821	1.17518	0.000451713	0.0058391	up
CmoCh01G015600	0.405285	-1.30299	0.000455379	0.00587853	down
CmoCh15G000930	0.417075	-1.26162	0.000455611	0.00587853	down
CmoCh06G005960	0.492425	-1.02203	0.000458657	0.00591147	down
CmoCh04G018910	2.98511	1.57779	0.000461722	0.00594777	up
CmoCh01G008250	0.370461	-1.43261	0.000462998	0.00596101	down
CmoCh19G007280	0.464172	-1.10727	0.000463915	0.0059696	down
CmoCh15G014380	0.23442	-2.09283	0.000464486	0.00597375	down
CmoCh11G007930	0.484962	-1.04405	0.000465611	0.005985	down
CmoCh11G009390	0.180346	-2.47116	0.000469274	0.00602562	down
CmoCh16G008320	0.494001	-1.01741	0.000469656	0.0060273	down
CmoCh17G003840	0.259321	-1.94719	0.000472532	0.00606096	down
CmoCh17G004860	0.478988	-1.06194	0.000473461	0.00606782	down
CmoCh11G003500	0.224063	-2.15802	0.000473574	0.00606782	down
CmoCh01G005900	0.115872	-3.10939	0.000474204	0.00606935	down
CmoCh03G000990	0.39021	-1.35768	0.00047837	0.00611619	down
CmoCh17G010190	0.406503	-1.29866	0.000478685	0.00611696	down
CmoCh06G004870	0.168214	-2.57163	0.000483542	0.00616587	down
CmoCh01G021000	0.354633	-1.4956	0.000484097	0.00616632	down
CmoCh06G000260	2.22242	1.15213	0.000484185	0.00616632	up
CmoCh13G001860	0.121229	-3.04419	0.000485012	0.00617147	down
CmoCh01G005770	0.29977	-1.73807	0.000486448	0.0061799	down
CmoCh04G026910	0.45038	-1.15078	0.000490921	0.00622682	down
CmoCh05G003150	2.47004	1.30453	0.000496542	0.00628149	up
CmoCh14G001760	0.458509	-1.12498	0.000498765	0.00630296	down
CmoCh12G011890	0.42916	-1.22041	0.000501177	0.00632677	down
CmoCh14G002310	3.4797	1.79896	0.000505886	0.00637613	up
CmoCh01G021020	0.486865	-1.03841	0.000507925	0.00639511	down
CmoCh15G007290	0.2279	-2.13352	0.000508208	0.00639531	down
CmoCh15G009410	0.28831	-1.79431	0.000509562	0.00640897	down
CmoCh12G002510	0.373067	-1.42249	0.000515311	0.0064711	down
CmoCh16G004070	0.300553	-1.73431	0.000515654	0.00647201	down
CmoCh05G012590	0.235215	-2.08795	0.000516837	0.00648346	down
CmoCh08G006290	0.274257	-1.8664	0.000518829	0.00649824	down
CmoCh19G009510	0.155065	-2.68906	0.000527276	0.00657997	down
CmoCh08G006760	0.497152	-1.00824	0.000527763	0.00658047	down
CmoCh03G014270	0.375036	-1.4149	0.000527866	0.00658047	down
CmoCh10G011580	2.065	1.04614	0.000529321	0.00659518	up
CmoCh08G006400	0.223995	-2.15846	0.000529948	0.00659956	down
CmoCh11G009640	0.215811	-2.21216	0.000530544	0.00660355	down
CmoCh18G010160	0.422286	-1.24371	0.000535705	0.00665741	down
CmoCh06G013980	0.476759	-1.06867	0.000537435	0.006672	down
CmoCh04G013130	0.294955	-1.76143	0.000539389	0.00668931	down
CmoCh17G003540	0.477054	-1.06778	0.000540325	0.00669746	down
CmoCh13G006130	0.446509	-1.16324	0.000540967	0.00669921	down
CmoCh05G001880	3.79407	1.92375	0.000541104	0.00669921	up
CmoCh14G001510	0.205565	-2.28233	0.000542464	0.00670663	down
CmoCh12G006850	3.43963	1.78225	0.000544558	0.0067221	up
CmoCh15G002890	0.477774	-1.0656	0.000545601	0.00673151	down
CmoCh04G001750	0.488486	-1.03361	0.000546566	0.00673703	down
CmoCh09G008250	0.199825	-2.32319	0.000552708	0.00680169	down
CmoCh04G009910	0.19226	-2.37887	0.000556691	0.00684367	down
CmoCh04G003520	0.229854	-2.12121	0.000563147	0.00691239	down
CmoCh15G009560	0.330573	-1.59696	0.00056363	0.00691478	down
CmoCh03G014290	0.427669	-1.22543	0.000567864	0.00696317	down
CmoCh07G008340	2.36525	1.24199	0.000570649	0.00699016	up
CmoCh04G025040	0.412321	-1.27816	0.000586362	0.00716632	down
CmoCh11G007140	0.481791	-1.05352	0.000586525	0.00716632	down
CmoCh12G006260	0.456528	-1.13122	0.000592876	0.00723284	down
CmoCh14G012560	0.456429	-1.13154	0.000594918	0.00724347	down
CmoCh14G015660	12.9766	3.69784	0.000595203	0.00724347	up
CmoCh02G015910	0.316078	-1.66165	0.000595561	0.00724347	down
CmoCh17G013210	0.183918	-2.44286	0.000600626	0.00728873	down
CmoCh18G008270	2.01241	1.00892	0.000600803	0.00728873	up
CmoCh07G012140	0.295104	-1.76071	0.000602693	0.00730222	down
CmoCh18G004490	0.355234	-1.49316	0.000602856	0.00730222	down
CmoCh07G000390	0.420499	-1.24983	0.000603134	0.00730222	down
CmoCh20G009460	0.29473	-1.76253	0.000608829	0.00735023	down
CmoCh14G015000	0.25614	-1.96499	0.000616138	0.00742589	down
CmoCh04G030000	0.38716	-1.369	0.000626356	0.00753388	down
CmoCh06G014460	0.483953	-1.04706	0.000627009	0.00753435	down
CmoCh18G009690	0.448749	-1.15602	0.000628267	0.00754551	down
CmoCh02G004190	0.322555	-1.63238	0.000632927	0.00759766	down
CmoCh11G015630	3.68193	1.88046	0.000640002	0.0076749	up
CmoCh14G018320	0.470935	-1.0864	0.000644216	0.00770999	down
CmoCh13G010780	2.07251	1.05138	0.000644975	0.00771523	up
CmoCh10G002120	3.12782	1.64516	0.000645747	0.00771964	up
CmoCh16G010840	0.412519	-1.27747	0.000645989	0.00771964	down
CmoCh14G015690	46.6476	5.54373	0.00064755	0.0077306	up
CmoCh08G006520	0.451637	-1.14676	0.000651443	0.00776506	down
CmoCh04G015210	0.286605	-1.80287	0.000651733	0.00776506	down
CmoCh05G004170	0.216725	-2.20606	0.000656507	0.00781805	down
CmoCh10G010860	0.212897	-2.23177	0.000659382	0.00784838	down
CmoCh18G013400	0.445793	-1.16555	0.000661095	0.00786486	down
CmoCh01G020200	0.111706	-3.16222	0.000666383	0.00791205	down
CmoCh18G005630	0.102999	-3.27929	0.0006673	0.00791903	down
CmoCh05G005920	0.407756	-1.29422	0.000669105	0.00793651	down
CmoCh14G001610	0.219781	-2.18586	0.000669936	0.00794243	down
CmoCh07G008610	0.323202	-1.62949	0.000670345	0.00794335	down
CmoCh05G009730	0.318919	-1.64874	0.000671811	0.0079568	down
CmoCh10G005300	0.329975	-1.59957	0.000674395	0.00798345	down
CmoCh11G013620	0.290666	-1.78257	0.000677599	0.00801347	down
CmoCh14G014720	2.36373	1.24107	0.000681193	0.00805199	up
CmoCh18G006400	0.475761	-1.07169	0.000691412	0.00815155	down
CmoCh10G004460	0.168317	-2.57075	0.00069404	0.0081716	down
CmoCh19G007490	0.459826	-1.12084	0.000697796	0.00820775	down
CmoCh03G005260	2.09499	1.06695	0.000698341	0.00821013	up
CmoCh14G016990	2.68984	1.42752	0.000703194	0.00825909	up
CmoCh17G005420	3.09243	1.62874	0.000703928	0.00826365	up
CmoCh14G003000	3.92165	1.97146	0.000708303	0.00831094	up
CmoCh03G011600	0.100785	-3.31065	0.000709436	0.00832016	down
CmoCh16G010470	0.280111	-1.83593	0.000710615	0.00832991	down
CmoCh04G026290	2.47317	1.30636	0.000714071	0.00836224	up
CmoCh10G007030	0.16235	-2.62282	0.000718617	0.00840473	down
CmoCh20G009780	0.480979	-1.05595	0.000721075	0.00842706	down
CmoCh17G010140	0.430594	-1.2156	0.000722061	0.00843108	down
CmoCh20G008740	0.132801	-2.91267	0.000725966	0.00846902	down
CmoCh08G004510	2.81042	1.49079	0.000728658	0.00849569	up
CmoCh01G006440	2.64599	1.40381	0.000732548	0.00852445	up
CmoCh02G004370	0.334077	-1.58175	0.000734995	0.00854878	down
CmoCh19G002320	0.497632	-1.00685	0.000739155	0.00858882	down
CmoCh12G002920	2.99821	1.5841	0.000739964	0.00859374	up
CmoCh03G012660	0.27478	-1.86365	0.000740296	0.00859374	down
CmoCh16G001830	0.389597	-1.35994	0.000742295	0.00861278	down
CmoCh14G017220	0.444296	-1.17041	0.000745101	0.00863698	down
CmoCh06G012080	0.449931	-1.15223	0.000749876	0.00867134	down
CmoCh03G010290	0.496969	-1.00877	0.000752595	0.00869859	down
CmoCh09G009810	0.441973	-1.17797	0.000755671	0.00872152	down
CmoCh10G007310	0.43518	-1.20032	0.000756833	0.00872708	down
CmoCh04G022530	0.257717	-1.95614	0.000757069	0.00872708	down
CmoCh08G007310	0.377717	-1.40462	0.000757245	0.00872708	down
CmoCh18G010070	2.719	1.44308	0.000759798	0.00874388	up
CmoCh07G001080	0.413896	-1.27266	0.000762829	0.00877455	down
CmoCh16G002120	2.95126	1.56133	0.000764137	0.00878538	up
CmoCh02G003530	0.159884	-2.6449	0.000765373	0.00879537	down
CmoCh06G005470	0.304656	-1.71475	0.000767966	0.00881884	down
CmoCh20G004510	0.480827	-1.05641	0.000768152	0.00881884	down
CmoCh06G013880	0.215552	-2.21389	0.000770281	0.00883816	down
CmoCh11G002220	0.445053	-1.16795	0.000771244	0.00883816	down
CmoCh11G003270	0.24718	-2.01637	0.00077409	0.0088573	down
CmoCh04G028930	0.117131	-3.0938	0.000775907	0.00887386	down
CmoCh02G012020	0.444786	-1.16882	0.000777178	0.00888416	down
CmoCh18G007180	0.487375	-1.03689	0.000778768	0.00889808	down
CmoCh17G001780	0.413279	-1.27481	0.000780371	0.0089079	down
CmoCh11G007980	3.00267	1.58625	0.000782731	0.00893058	up
CmoCh06G001750	4.42978	2.14723	0.000785794	0.00895607	up
CmoCh13G000530	0.339614	-1.55803	0.000785839	0.00895607	down
CmoCh08G004880	0.476231	-1.07027	0.000786086	0.00895607	down
CmoCh14G001920	0.381501	-1.39024	0.000789494	0.00898636	down
CmoCh10G003060	0.235458	-2.08646	0.000790842	0.00899742	down
CmoCh01G013670	0.358824	-1.47865	0.000791775	0.00900377	down
CmoCh01G017070	0.479093	-1.06162	0.000792195	0.00900427	down
CmoCh02G001710	0.14287	-2.80723	0.000792848	0.00900742	down
CmoCh02G010500	2.17901	1.12367	0.000795688	0.00903539	up
CmoCh14G021140	0.25635	-1.96381	0.000800203	0.00907806	down
CmoCh01G009100	0.225118	-2.15125	0.000805664	0.00912705	down
CmoCh14G005290	0.490724	-1.02702	0.00081676	0.00922004	down
CmoCh13G003740	2.10848	1.0762	0.000820212	0.00923943	up
CmoCh14G010860	0.38441	-1.37928	0.000823544	0.0092639	down
CmoCh03G002620	0.250891	-1.99486	0.000824166	0.00926655	down
CmoCh09G001620	0.378215	-1.40272	0.000826006	0.00928056	down
CmoCh19G008970	0.446504	-1.16326	0.000826187	0.00928056	down
CmoCh02G009350	0.407947	-1.29355	0.000832299	0.00934046	down
CmoCh01G010880	0.271152	-1.88282	0.000840288	0.00942129	down
CmoCh10G010540	0.286394	-1.80393	0.000857666	0.0095758	down
CmoCh15G009450	0.346179	-1.53041	0.000862043	0.00960815	down
CmoCh15G010260	0.288224	-1.79474	0.000863523	0.00961766	down
CmoCh06G013380	2.19431	1.13376	0.000863823	0.00961766	up
CmoCh11G007480	0.220426	-2.18163	0.000865332	0.00962999	down
CmoCh15G014430	0.205586	-2.28219	0.000869029	0.00965767	down
CmoCh04G005010	0.426687	-1.22875	0.000869733	0.00966101	down
CmoCh14G010540	0.177376	-2.49511	0.00087162	0.00967748	down
CmoCh20G009070	2.16768	1.11615	0.000882925	0.00977747	up
CmoCh06G005840	0.265558	-1.9129	0.000895165	0.00989306	down
CmoCh16G006530	2.37411	1.24739	0.000897532	0.00991047	up
CmoCh19G002280	3.08656	1.626	0.000897567	0.00991047	up
CmoCh02G003600	2.00262	1.00189	0.000904553	0.00996464	up
CmoCh17G004420	7.0759	2.82291	0.000909431	0.0100092	up
CmoCh11G018120	0.455965	-1.133	0.000913922	0.0100497	down
CmoCh08G002600	0.358659	-1.47932	0.000913955	0.0100497	down
CmoCh11G004670	2.02364	1.01695	0.000915646	0.0100637	up
CmoCh00G000570	3.68001	1.87971	0.000918318	0.0100884	up
CmoCh09G004280	0.304839	-1.71388	0.000932792	0.0102007	down
CmoCh18G004090	0.419431	-1.25349	0.00093667	0.0102316	down
CmoCh14G004700	0.32573	-1.61825	0.000936901	0.0102316	down
CmoCh04G015860	2.3498	1.23254	0.000940127	0.0102622	up
CmoCh03G009830	0.344353	-1.53804	0.000940942	0.0102626	down
CmoCh15G007040	2.82501	1.49826	0.000941028	0.0102626	up
CmoCh11G006140	0.24578	-2.02456	0.000944907	0.0102956	down
CmoCh05G013360	0.36582	-1.45079	0.000946652	0.010304	down
CmoCh19G005450	10.5603	3.40058	0.000954249	0.0103738	up
CmoCh06G012800	0.484949	-1.0441	0.000956307	0.0103914	down
CmoCh08G002650	0.455679	-1.13391	0.000957296	0.0103975	down
CmoCh02G004740	0.465097	-1.1044	0.000963148	0.0104308	down
CmoCh04G012110	0.407322	-1.29576	0.000963415	0.0104308	down
CmoCh02G006930	0.229276	-2.12484	0.000967095	0.0104471	down
CmoCh05G012620	0.41948	-1.25332	0.000969081	0.0104638	down
CmoCh04G001490	0.261371	-1.93583	0.000974552	0.010513	down
CmoCh02G013070	0.253894	-1.9777	0.000976108	0.0105197	down
CmoCh04G029980	0.218309	-2.19556	0.000976449	0.0105197	down
CmoCh14G020100	2.67225	1.41806	0.000979625	0.0105349	up
CmoCh18G012650	0.467259	-1.09771	0.000992863	0.0106416	down
CmoCh08G003590	0.48714	-1.03759	0.000992962	0.0106416	down
CmoCh19G007390	0.474689	-1.07495	0.000994647	0.0106487	down
CmoCh13G010360	0.154121	-2.69786	0.000995227	0.0106501	down
CmoCh19G008960	0.271004	-1.88361	0.000997227	0.0106668	down
CmoCh18G002340	2.22402	1.15317	0.00100754	0.0107627	up
CmoCh08G010800	0.265989	-1.91056	0.0010096	0.0107703	down
CmoCh11G014010	0.422747	-1.24214	0.00101052	0.0107705	down
CmoCh06G012720	0.283964	-1.81622	0.00101509	0.0108048	down
CmoCh04G015570	3.79328	1.92345	0.00101704	0.0108207	up
CmoCh06G010270	0.478361	-1.06383	0.0010195	0.010842	down
CmoCh16G006570	3.53233	1.82062	0.00102191	0.0108629	up
CmoCh17G010300	0.31745	-1.6554	0.00103933	0.0110236	down
CmoCh20G003180	0.313715	-1.67248	0.00104035	0.0110247	down
CmoCh04G021500	0.470539	-1.08761	0.00104169	0.0110292	down
CmoCh09G008710	0.484195	-1.04634	0.00104677	0.0110732	down
CmoCh01G019190	0.427877	-1.22473	0.001051	0.0111	down
CmoCh16G012170	0.211576	-2.24075	0.00105156	0.0111	down
CmoCh05G003120	0.464661	-1.10575	0.001053	0.0111047	down
CmoCh04G005510	0.328823	-1.60462	0.00105816	0.0111493	down
CmoCh17G004180	0.399939	-1.32215	0.00106196	0.0111697	down
CmoCh03G001130	0.133289	-2.90737	0.00106369	0.0111796	down
CmoCh18G012110	2.13005	1.09089	0.00106559	0.0111932	up
CmoCh11G002820	0.339856	-1.557	0.00106633	0.011196	down
CmoCh05G001590	0.129539	-2.94854	0.00107065	0.0112364	down
CmoCh19G003160	0.252733	-1.98431	0.00108045	0.0113195	down
CmoCh05G005790	0.0506303	-4.30386	0.00108217	0.0113313	down
CmoCh05G005620	2.94021	1.55592	0.00108382	0.0113398	up
CmoCh01G000110	0.486474	-1.03956	0.00109479	0.011425	down
CmoCh13G007350	2.49928	1.32151	0.00109821	0.0114469	up
CmoCh16G002610	0.325897	-1.61751	0.00109835	0.0114469	down
CmoCh09G000710	0.290679	-1.7825	0.00109887	0.0114474	down
CmoCh03G008620	0.268074	-1.89929	0.00110622	0.011514	down
CmoCh04G004640	2.09266	1.06534	0.00110802	0.0115226	up
CmoCh16G010640	0.487299	-1.03712	0.00111233	0.0115524	down
CmoCh19G009990	0.395986	-1.33648	0.00111397	0.0115608	down
CmoCh10G005030	2.20649	1.14175	0.0011141	0.0115608	up
CmoCh17G002340	0.433863	-1.20469	0.00111882	0.011592	down
CmoCh09G001930	0.339068	-1.56035	0.00111993	0.011592	down
CmoCh16G006500	2.37738	1.24937	0.0011202	0.011592	up
CmoCh14G001440	0.221677	-2.17347	0.0011205	0.011592	down
CmoCh18G010610	0.231193	-2.11283	0.00112391	0.0116129	down
CmoCh17G003450	0.318471	-1.65077	0.00112854	0.01164	down
CmoCh07G007740	0.25571	-1.96742	0.0011309	0.0116543	down
CmoCh17G007580	2.50237	1.3233	0.00113899	0.0117277	up
CmoCh01G018250	0.222643	-2.1672	0.00114331	0.0117671	down
CmoCh04G002120	0.414223	-1.27152	0.0011479	0.0118092	down
CmoCh11G012480	0.403003	-1.31114	0.00115811	0.0118939	down
CmoCh11G014110	2.26618	1.18026	0.00116481	0.0119498	up
CmoCh09G004930	0.381869	-1.38885	0.00116506	0.0119498	down
CmoCh04G022040	0.328151	-1.60757	0.00116787	0.0119684	down
CmoCh02G010150	2.21824	1.14942	0.00116978	0.0119828	up
CmoCh05G010560	0.499945	-1.00016	0.00117322	0.0120079	down
CmoCh01G003640	0.438986	-1.18775	0.00117984	0.0120601	down
CmoCh18G008180	0.371771	-1.42751	0.0011809	0.0120659	down
CmoCh01G019090	0.404375	-1.30624	0.00118273	0.0120793	down
CmoCh06G013730	0.372745	-1.42374	0.00118524	0.0120977	down
CmoCh16G006810	0.480987	-1.05593	0.00119651	0.0122045	down
CmoCh01G013100	0.42343	-1.23981	0.00119942	0.012229	down
CmoCh08G009320	0.22919	-2.12538	0.00120644	0.0122953	down
CmoCh04G003440	0.458415	-1.12527	0.0012082	0.0123037	down
CmoCh04G003020	0.278049	-1.84659	0.00121436	0.0123498	down
CmoCh04G028550	0.315254	-1.66542	0.00121578	0.0123573	down
CmoCh04G003040	6.69655	2.74342	0.00121725	0.0123608	up
CmoCh03G001720	0.43039	-1.21628	0.00121751	0.0123608	down
CmoCh20G004360	0.295177	-1.76035	0.00122673	0.0124334	down
CmoCh08G008310	5.3111	2.40901	0.00123848	0.0125365	up
CmoCh05G008720	0.10726	-3.22082	0.00123973	0.0125439	down
CmoCh12G003640	0.478896	-1.06222	0.00125493	0.0126603	down
CmoCh02G009010	0.278998	-1.84167	0.00125864	0.012687	down
CmoCh04G006730	2.18648	1.12861	0.00126397	0.0127354	up
CmoCh06G012740	0.390872	-1.35523	0.00126523	0.0127427	down
CmoCh11G015280	0.137684	-2.86057	0.00126892	0.0127745	down
CmoCh14G019180	0.289463	-1.78855	0.00127853	0.0128659	down
CmoCh09G011900	0.307687	-1.70047	0.00129909	0.0130618	down
CmoCh10G003010	2.7092	1.43786	0.00130578	0.0131125	up
CmoCh02G016710	0.449532	-1.1535	0.00131776	0.0132163	down
CmoCh02G006450	2.71701	1.44202	0.00132294	0.013249	up
CmoCh12G010780	0.441726	-1.17878	0.00132643	0.0132698	down
CmoCh04G031540	0.182099	-2.4572	0.00132827	0.0132827	down
CmoCh20G002120	0.275074	-1.86211	0.0013292	0.0132864	down
CmoCh17G008710	0.39951	-1.3237	0.00133311	0.0133144	down
CmoCh03G010490	0.227836	-2.13393	0.0013376	0.013337	down
CmoCh20G010750	0.325162	-1.62077	0.00134434	0.0133986	down
CmoCh17G004470	0.253559	-1.97961	0.00136525	0.0135731	down
CmoCh07G009750	0.381334	-1.39087	0.00137096	0.0136187	down
CmoCh14G002990	0.363106	-1.46154	0.00137233	0.0136187	down
CmoCh10G008420	0.276429	-1.85502	0.00137318	0.0136187	down
CmoCh05G008690	2.38808	1.25585	0.00137324	0.0136187	up
CmoCh17G008650	0.38061	-1.39362	0.00137945	0.0136633	down
CmoCh09G008040	0.441665	-1.17898	0.00138249	0.0136752	down
CmoCh07G006670	2.80794	1.48951	0.00138428	0.0136772	up
CmoCh05G003030	0.350706	-1.51167	0.00138505	0.0136792	down
CmoCh06G009470	0.313204	-1.67482	0.00139614	0.0137661	down
CmoCh20G007180	0.415637	-1.26661	0.00139719	0.0137708	down
CmoCh15G005630	0.324476	-1.62382	0.0014063	0.0138434	down
CmoCh05G003550	2.94239	1.55699	0.00141141	0.0138881	up
CmoCh20G009450	0.453307	-1.14144	0.00142034	0.0139587	down
CmoCh04G011580	3.05709	1.61216	0.00142914	0.0140222	up
CmoCh05G000880	0.3242	-1.62504	0.00143113	0.0140359	down
CmoCh18G000360	0.123681	-3.0153	0.00143244	0.0140431	down
CmoCh11G008170	0.253609	-1.97932	0.00143806	0.0140809	down
CmoCh12G001260	3.87401	1.95383	0.00144675	0.0141544	up
CmoCh02G014640	0.411062	-1.28257	0.00145135	0.0141878	down
CmoCh04G016500	0.396224	-1.33561	0.00145341	0.0142003	down
CmoCh05G010970	0.321561	-1.63684	0.00145381	0.0142003	down
CmoCh06G002650	0.460781	-1.11785	0.00146319	0.0142798	down
CmoCh04G018450	2.48326	1.31224	0.00146374	0.0142798	up
CmoCh04G022020	0.286039	-1.80571	0.00148424	0.0144621	down
CmoCh01G004050	0.456471	-1.1314	0.00148684	0.0144699	down
CmoCh07G009070	0.191062	-2.38789	0.00148746	0.0144699	down
CmoCh19G010690	0.407687	-1.29447	0.00150131	0.0145987	down
CmoCh10G007300	0.435341	-1.19978	0.00151578	0.0147184	down
CmoCh09G012600	2.24791	1.16858	0.00151607	0.0147184	up
CmoCh09G006890	0.455255	-1.13525	0.00151866	0.0147376	down
CmoCh01G004800	0.270146	-1.88819	0.00152067	0.0147511	down
CmoCh05G013330	0.436587	-1.19566	0.00152461	0.0147774	down
CmoCh17G002430	0.372702	-1.42391	0.0015311	0.0148343	down
CmoCh02G007360	0.492891	-1.02066	0.00153514	0.0148554	down
CmoCh19G000690	2.64192	1.40159	0.00153631	0.0148607	up
CmoCh10G009920	9.86218	3.30191	0.00155339	0.0150017	up
CmoCh01G015130	0.080744	-3.6305	0.00157359	0.0151601	down
CmoCh13G010490	0.334244	-1.58103	0.00157577	0.015175	down
CmoCh04G017260	2.68835	1.42672	0.0015913	0.0152694	up
CmoCh17G010380	0.297866	-1.74726	0.00159929	0.0153399	down
CmoCh14G010210	0.290545	-1.78317	0.0016008	0.0153435	down
CmoCh07G004030	0.262643	-1.92883	0.00160267	0.0153539	down
CmoCh11G002410	0.336847	-1.56983	0.0016035	0.0153553	down
CmoCh10G010560	0.309757	-1.69079	0.00160743	0.015381	down
CmoCh17G000560	0.292694	-1.77254	0.00161203	0.0154189	down
CmoCh02G004800	2.21567	1.14774	0.00161294	0.0154214	up
CmoCh06G000270	2.91761	1.54479	0.0016185	0.0154684	up
CmoCh17G001790	0.471663	-1.08417	0.00162001	0.0154767	down
CmoCh02G008460	0.458041	-1.12645	0.00162246	0.0154821	down
CmoCh16G007450	0.398767	-1.32638	0.00162317	0.0154821	down
CmoCh01G015350	0.256661	-1.96206	0.00164377	0.0156537	down
CmoCh18G013500	0.447711	-1.15936	0.001656	0.0157451	down
CmoCh08G009960	2.41016	1.26913	0.00165741	0.0157473	up
CmoCh16G012160	0.238282	-2.06926	0.00165819	0.0157473	down
CmoCh05G003650	0.421527	-1.2463	0.00166153	0.015753	down
CmoCh20G006300	0.311485	-1.68277	0.00166208	0.015753	down
CmoCh01G013660	2.19104	1.13161	0.00166931	0.0158028	up
CmoCh09G005110	0.287568	-1.79802	0.00167209	0.0158082	down
CmoCh05G001870	0.153619	-2.70257	0.00167271	0.0158082	down
CmoCh14G020330	0.403046	-1.31098	0.00167778	0.0158413	down
CmoCh14G004090	0.469636	-1.09039	0.00167841	0.0158413	down
CmoCh11G003360	0.495134	-1.01411	0.00167868	0.0158413	down
CmoCh04G009870	2.03376	1.02415	0.00168065	0.0158537	up
CmoCh04G012430	2.93097	1.55138	0.00168743	0.0158864	up
CmoCh07G003000	0.36269	-1.46319	0.00169489	0.0159441	down
CmoCh09G007920	0.451884	-1.14598	0.00169874	0.0159691	down
CmoCh13G001560	0.305717	-1.70973	0.00169956	0.0159692	down
CmoCh14G001730	3.07934	1.62262	0.00170445	0.0160088	up
CmoCh18G012980	0.433594	-1.20558	0.00171902	0.0161267	down
CmoCh01G013000	0.241731	-2.04853	0.00172098	0.0161388	down
CmoCh10G001900	3.65824	1.87115	0.0017235	0.0161439	up
CmoCh19G003910	0.323553	-1.62793	0.00172353	0.0161439	down
CmoCh04G006840	2.6422	1.40174	0.00172354	0.0161439	up
CmoCh10G011920	0.371979	-1.42671	0.00172593	0.0161599	down
CmoCh02G005600	0.330831	-1.59584	0.0017408	0.01628	down
CmoCh04G009650	0.259659	-1.94531	0.00174302	0.0162929	down
CmoCh04G024830	0.379189	-1.39901	0.00174421	0.0162929	down
CmoCh10G008050	2.82549	1.4985	0.00175757	0.0163985	up
CmoCh18G004630	2.11235	1.07885	0.00176467	0.0164392	up
CmoCh06G004620	2.1495	1.104	0.00177898	0.0165596	up
CmoCh04G017500	3.3126	1.72796	0.00178822	0.0166391	up
CmoCh03G012340	0.429291	-1.21997	0.00179774	0.0167147	down
CmoCh02G004310	2.00197	1.00142	0.00180685	0.0167799	up
CmoCh14G021930	2.26185	1.1775	0.00181086	0.0168106	up
CmoCh14G011610	0.282836	-1.82196	0.00185768	0.0171907	down
CmoCh19G001550	0.262769	-1.92813	0.00185827	0.0171907	down
CmoCh06G007250	0.372747	-1.42373	0.00185929	0.0171936	down
CmoCh08G004740	5.70983	2.51345	0.00186163	0.0172086	up
CmoCh06G014970	0.332215	-1.58981	0.00186988	0.0172516	down
CmoCh13G006600	2.53963	1.34462	0.00188741	0.0173598	up
CmoCh11G015570	0.292135	-1.77529	0.00189191	0.0173879	down
CmoCh07G008650	0.49564	-1.01264	0.0019045	0.0174902	down
CmoCh04G001190	0.313467	-1.67361	0.00194736	0.0178428	down
CmoCh19G007340	0.464749	-1.10548	0.00195235	0.0178748	down
CmoCh04G019330	2.66348	1.41331	0.00195512	0.0178933	up
CmoCh17G001200	0.245582	-2.02572	0.0019643	0.0179499	down
CmoCh04G021260	0.0890583	-3.48911	0.00197243	0.0179999	down
CmoCh02G000890	0.292406	-1.77395	0.00197278	0.0179999	down
CmoCh04G000470	0.43367	-1.20533	0.00198453	0.0180727	down
CmoCh06G001360	2.00774	1.00557	0.00199391	0.0181444	up
CmoCh04G008380	0.447933	-1.15864	0.00199715	0.0181669	down
CmoCh13G007870	0.385677	-1.37453	0.00200055	0.018191	down
CmoCh04G010920	0.423041	-1.24113	0.00201665	0.0183234	down
CmoCh06G008000	0.253363	-1.98072	0.00201761	0.0183253	down
CmoCh19G002560	0.218021	-2.19746	0.00202443	0.0183663	down
CmoCh02G015480	0.424044	-1.23772	0.00202844	0.0183818	down
CmoCh18G005500	0.329619	-1.60113	0.00203133	0.018394	down
CmoCh15G004910	0.443562	-1.17279	0.00203593	0.0184288	down
CmoCh18G009000	0.445943	-1.16507	0.00203821	0.0184424	down
CmoCh01G002220	0.412179	-1.27866	0.00204245	0.0184738	down
CmoCh04G003710	3.6505	1.8681	0.00204899	0.018526	up
CmoCh04G000420	0.43178	-1.21163	0.00205775	0.0185911	down
CmoCh04G015960	0.485651	-1.04201	0.00206528	0.0186237	down
CmoCh20G006220	0.463884	-1.10816	0.00206556	0.0186237	down
CmoCh12G010110	0.372943	-1.42297	0.00207258	0.0186709	down
CmoCh11G009090	0.307682	-1.70049	0.00207281	0.0186709	down
CmoCh07G004700	3.46972	1.79482	0.00208215	0.0187269	up
CmoCh07G005320	0.39745	-1.33116	0.00209545	0.0188375	down
CmoCh10G008660	2.64475	1.40313	0.00211385	0.0189574	up
CmoCh03G004610	0.498874	-1.00325	0.00211411	0.0189574	down
CmoCh13G006860	0.311149	-1.68432	0.00211865	0.0189643	down
CmoCh16G009570	3.16986	1.66442	0.00212899	0.0190304	up
CmoCh07G013370	2.52288	1.33507	0.00214204	0.0191219	up
CmoCh19G005490	11.3658	3.50662	0.00216285	0.019279	up
CmoCh06G006850	0.258814	-1.95001	0.00216607	0.0192861	down
CmoCh18G005240	2.91841	1.54518	0.00217778	0.0193688	up
CmoCh02G001400	2.16869	1.11682	0.00218022	0.0193761	up
CmoCh02G013660	0.352824	-1.50298	0.00219295	0.0194532	down
CmoCh10G000820	0.472828	-1.08061	0.0022103	0.0195562	down
CmoCh18G010140	0.321393	-1.63759	0.00222199	0.0196164	down
CmoCh16G006480	0.462184	-1.11346	0.00222756	0.0196583	down
CmoCh07G008380	0.298381	-1.74477	0.00223141	0.0196851	down
CmoCh16G008730	0.0891409	-3.48777	0.00224152	0.0197525	down
CmoCh14G010360	0.462501	-1.11247	0.00224399	0.0197596	down
CmoCh13G009150	0.442119	-1.17749	0.00227652	0.0199947	down
CmoCh14G021760	0.499002	-1.00288	0.00227816	0.0200017	down
CmoCh15G001650	2.09638	1.0679	0.00229649	0.0201432	up
CmoCh20G003830	0.484685	-1.04488	0.00230118	0.0201669	down
CmoCh10G009080	2.20138	1.13841	0.00230471	0.02019	up
CmoCh04G017710	0.372515	-1.42463	0.00230821	0.0202063	down
CmoCh05G005440	3.53775	1.82283	0.00231032	0.0202171	up
CmoCh18G003480	2.13675	1.09542	0.00231113	0.0202171	up
CmoCh14G015600	0.373356	-1.42138	0.00231453	0.0202247	down
CmoCh17G005330	0.49615	-1.01115	0.00233007	0.0203309	down
CmoCh16G004470	0.148243	-2.75396	0.00233542	0.0203553	down
CmoCh09G006120	0.439701	-1.1854	0.00234395	0.0203999	down
CmoCh10G000980	0.242311	-2.04507	0.00236317	0.0205543	down
CmoCh14G001320	0.230763	-2.11551	0.0023634	0.0205543	down
CmoCh14G011220	0.458555	-1.12483	0.00236907	0.0205812	down
CmoCh18G000530	0.385437	-1.37543	0.00237228	0.0206016	down
CmoCh17G004880	0.335474	-1.57573	0.00237434	0.020612	down
CmoCh03G006980	0.317939	-1.65318	0.00237938	0.0206483	down
CmoCh18G011490	0.289597	-1.78788	0.0023872	0.0206885	down
CmoCh07G003550	0.496244	-1.01088	0.00239294	0.0207186	down
CmoCh09G006170	0.372095	-1.42626	0.00240632	0.0207655	down
CmoCh17G001380	0.475881	-1.07133	0.00240697	0.0207655	down
CmoCh10G000310	0.37556	-1.41289	0.00241648	0.0208344	down
CmoCh08G010880	0.403691	-1.30868	0.00243035	0.0209314	down
CmoCh06G005620	0.239822	-2.05997	0.0024379	0.0209886	down
CmoCh10G011540	0.485038	-1.04383	0.00243956	0.0209886	down
CmoCh14G004020	0.368301	-1.44104	0.00243962	0.0209886	down
CmoCh13G001630	2.16604	1.11506	0.00245216	0.0210662	up
CmoCh11G019280	0.299602	-1.73888	0.00246106	0.02112	down
CmoCh06G009950	0.353224	-1.50134	0.00250768	0.0214586	down
CmoCh18G005510	0.255745	-1.96722	0.00251055	0.0214692	down
CmoCh04G006910	0.286386	-1.80397	0.00251071	0.0214692	down
CmoCh17G012420	0.143221	-2.80368	0.00251565	0.021496	down
CmoCh16G001840	0.3987	-1.32663	0.0025271	0.0215709	down
CmoCh01G019420	0.173162	-2.52981	0.00253156	0.0216012	down
CmoCh18G008980	0.435652	-1.19875	0.0025729	0.0219072	down
CmoCh16G007300	2.36406	1.24127	0.0025743	0.0219072	up
CmoCh10G005900	0.228439	-2.13012	0.00260653	0.0221529	down
CmoCh19G008400	0.413681	-1.27341	0.00260731	0.0221529	down
CmoCh05G004060	0.292085	-1.77554	0.00262775	0.02231	down
CmoCh18G002730	0.318583	-1.65026	0.00262859	0.02231	down
CmoCh09G002690	0.490005	-1.02913	0.00263947	0.0223864	down
CmoCh11G017340	0.495104	-1.0142	0.00264371	0.0224009	down
CmoCh11G002230	0.153819	-2.7007	0.0026446	0.0224009	down
CmoCh04G015230	0.183593	-2.44541	0.00264553	0.0224009	down
CmoCh15G001850	2.3494	1.23229	0.00264585	0.0224009	up
CmoCh13G009860	0.4483	-1.15746	0.00264731	0.0224053	down
CmoCh14G000470	0.366528	-1.448	0.00265145	0.0224325	down
CmoCh16G006690	0.431508	-1.21254	0.00266371	0.0224885	down
CmoCh14G010130	0.425203	-1.23378	0.00267325	0.0225612	down
CmoCh13G002720	0.310274	-1.68839	0.00267817	0.0225947	down
CmoCh09G012480	0.234584	-2.09183	0.0026795	0.022598	down
CmoCh07G003270	0.413723	-1.27326	0.00268209	0.0226039	down
CmoCh04G002600	0.282725	-1.82253	0.00268948	0.0226503	down
CmoCh15G003710	0.242359	-2.04478	0.00271437	0.0228197	down
CmoCh06G003400	2.06517	1.04626	0.00271603	0.0228257	up
CmoCh11G003550	2.00362	1.00261	0.00271982	0.0228496	up
CmoCh04G009960	0.382188	-1.38764	0.00274809	0.0230547	down
CmoCh09G000720	0.429404	-1.21959	0.00275033	0.0230654	down
CmoCh03G011230	2.73215	1.45004	0.00276901	0.0231977	up
CmoCh04G000120	0.496517	-1.01008	0.00277964	0.0232624	down
CmoCh10G004450	0.269776	-1.89017	0.00278596	0.023299	down
CmoCh12G002910	2.41736	1.27343	0.00280112	0.0234094	up
CmoCh09G000480	0.426922	-1.22796	0.002817	0.0235257	down
CmoCh07G012200	0.31451	-1.66882	0.00282289	0.0235667	down
CmoCh06G012050	0.302112	-1.72685	0.00283325	0.0236341	down
CmoCh15G010120	2.66526	1.41428	0.00283392	0.0236341	up
CmoCh06G013080	2.4279	1.27971	0.00285746	0.0238138	up
CmoCh01G012690	0.326443	-1.6151	0.00286598	0.0238599	down
CmoCh01G008590	0.389838	-1.35905	0.00286717	0.0238599	down
CmoCh07G006620	0.152088	-2.71703	0.00286738	0.0238599	down
CmoCh10G000790	0.407309	-1.2958	0.00286896	0.0238599	down
CmoCh15G009570	0.402541	-1.31279	0.00287121	0.0238703	down
CmoCh17G000060	0.42158	-1.24612	0.00287505	0.0238939	down
CmoCh01G011960	0.30764	-1.70068	0.0028774	0.0239052	down
CmoCh08G008520	0.331246	-1.59402	0.00288381	0.0239335	down
CmoCh09G005060	3.15949	1.65969	0.00288923	0.023968	up
CmoCh06G014440	0.442333	-1.17679	0.00288997	0.023968	down
CmoCh06G013390	2.41273	1.27067	0.00289638	0.0240129	up
CmoCh12G005250	0.255726	-1.96733	0.00290635	0.0240789	down
CmoCh18G007080	5.5006	2.45959	0.00292735	0.0241943	up
CmoCh01G000270	0.247976	-2.01173	0.00292992	0.0241988	down
CmoCh20G001030	0.303943	-1.71813	0.00293148	0.0242034	down
CmoCh07G005790	0.241854	-2.04779	0.00293364	0.0242129	down
CmoCh20G005500	0.290534	-1.78322	0.0029347	0.0242133	down
CmoCh01G000920	0.379676	-1.39716	0.00293905	0.0242409	down
CmoCh07G002850	4.13425	2.04763	0.00294448	0.0242606	up
CmoCh04G007270	0.47135	-1.08513	0.00299183	0.0245662	down
CmoCh01G020690	0.371011	-1.43046	0.00299486	0.0245826	down
CmoCh06G010230	2.60422	1.38085	0.00300706	0.024649	up
CmoCh09G005330	3.03376	1.60111	0.00302684	0.0247688	up
CmoCh14G005690	0.333437	-1.58451	0.00302803	0.0247701	down
CmoCh12G010880	0.379983	-1.39599	0.00303021	0.0247714	down
CmoCh04G012660	0.339596	-1.55811	0.00303443	0.0247893	down
CmoCh02G004940	2.43039	1.28119	0.00303451	0.0247893	up
CmoCh03G006960	0.399324	-1.32437	0.00304027	0.0248194	down
CmoCh17G011810	3.61079	1.85231	0.00304964	0.0248789	up
CmoCh05G011500	0.338755	-1.56169	0.00305814	0.0249312	down
CmoCh13G005480	2.69556	1.43058	0.00306072	0.0249354	up
CmoCh02G011840	0.390167	-1.35784	0.00306744	0.0249701	down
CmoCh01G007220	0.450102	-1.15168	0.00306811	0.0249701	down
CmoCh14G000380	0.297092	-1.75102	0.00307138	0.024986	down
CmoCh17G006390	0.401262	-1.31739	0.00307853	0.0250199	down
CmoCh01G018980	0.496486	-1.01017	0.00307945	0.0250199	down
CmoCh01G013090	0.362903	-1.46234	0.00308281	0.0250387	down
CmoCh03G006060	0.310486	-1.6874	0.00308662	0.0250611	down
CmoCh01G015160	8.34866	3.06154	0.00310245	0.0251641	up
CmoCh07G001930	0.270613	-1.8857	0.00310734	0.0251782	down
CmoCh14G002600	0.476586	-1.06919	0.00311604	0.0252316	down
CmoCh01G008400	0.260871	-1.93859	0.00314566	0.0254276	down
CmoCh11G006000	2.23766	1.16199	0.00314768	0.0254276	up
CmoCh15G014100	0.34563	-1.5327	0.00315281	0.0254605	down
CmoCh13G000210	0.393004	-1.34738	0.00316769	0.0255548	down
CmoCh14G011060	0.347782	-1.52375	0.00317287	0.0255755	down
CmoCh07G004850	0.348745	-1.51976	0.00317666	0.0255755	down
CmoCh17G010450	0.354659	-1.4955	0.00318039	0.0255883	down
CmoCh20G011640	0.431177	-1.21365	0.00319247	0.0256683	down
CmoCh17G001160	0.299917	-1.73737	0.00320819	0.0257688	down
CmoCh09G003050	2.35517	1.23583	0.00322592	0.0258875	up
CmoCh06G011970	0.30606	-1.70811	0.0032265	0.0258875	down
CmoCh02G012510	5.15247	2.36526	0.0032344	0.0259185	up
CmoCh14G008490	0.495172	-1.014	0.00323968	0.0259348	down
CmoCh06G000470	0.363669	-1.4593	0.0032525	0.0260287	down
CmoCh19G008880	0.442901	-1.17494	0.00325621	0.0260497	down
CmoCh11G006700	0.350641	-1.51193	0.00325765	0.0260525	down
CmoCh18G011640	2.03788	1.02707	0.00326089	0.0260611	up
CmoCh14G017180	0.485851	-1.04141	0.00327503	0.02613	down
CmoCh14G009470	0.426861	-1.22816	0.0032768	0.02613	down
CmoCh19G005480	10.429	3.38253	0.00328078	0.0261415	up
CmoCh08G008460	0.350543	-1.51233	0.00329391	0.0262112	down
CmoCh09G011770	3.12577	1.64421	0.00331172	0.0263355	up
CmoCh14G012450	2.07924	1.05606	0.00331946	0.0263883	up
CmoCh03G013320	0.299457	-1.73958	0.00332944	0.0264413	down
CmoCh03G013330	0.16339	-2.61361	0.00333271	0.0264498	down
CmoCh07G007190	0.455216	-1.13538	0.00333629	0.0264606	down
CmoCh17G009170	3.64775	1.867	0.00334678	0.0265263	up
CmoCh07G011340	4.58976	2.19842	0.00336125	0.0266058	up
CmoCh11G006570	0.483725	-1.04774	0.00337309	0.0266818	down
CmoCh09G000490	0.426111	-1.2307	0.00337601	0.0266825	down
CmoCh06G001770	0.480236	-1.05819	0.00337727	0.0266825	down
CmoCh04G014150	0.499509	-1.00142	0.00337763	0.0266825	down
CmoCh11G012830	0.327734	-1.6094	0.00338502	0.0267168	down
CmoCh14G006390	0.460833	-1.11768	0.00340285	0.0268375	down
CmoCh06G012010	0.463616	-1.109	0.00341733	0.0269189	down
CmoCh18G011100	0.434856	-1.20139	0.0034447	0.0270695	down
CmoCh02G015700	0.35902	-1.47787	0.0034473	0.0270722	down
CmoCh19G006900	2.19232	1.13246	0.00345878	0.0271446	up
CmoCh04G028540	0.388992	-1.36219	0.00346556	0.02718	down
CmoCh20G002990	2.44229	1.28824	0.00346802	0.0271904	up
CmoCh14G007660	0.332846	-1.58708	0.00349088	0.0273517	down
CmoCh04G001050	0.210945	-2.24506	0.00350463	0.0274415	down
CmoCh01G009190	0.282373	-1.82433	0.00353795	0.0276572	down
CmoCh17G002470	0.294504	-1.76364	0.0035457	0.0276997	down
CmoCh20G006500	0.468647	-1.09343	0.00355131	0.0277344	down
CmoCh11G015510	0.472761	-1.08082	0.00358014	0.0279473	down
CmoCh04G007310	2.07668	1.05428	0.00359018	0.0280107	up
CmoCh16G011820	0.474034	-1.07694	0.00359865	0.0280585	down
CmoCh15G005160	0.325087	-1.6211	0.00360534	0.0280832	down
CmoCh03G013270	0.466813	-1.09908	0.00364654	0.0283488	down
CmoCh07G012230	0.265578	-1.91279	0.00364823	0.0283499	down
CmoCh04G024820	0.37456	-1.41673	0.00365007	0.0283499	down
CmoCh07G013490	0.463702	-1.10873	0.00365022	0.0283499	down
CmoCh17G011720	0.335628	-1.57506	0.00366859	0.0284557	down
CmoCh13G001580	2.10096	1.07105	0.00368006	0.0285117	up
CmoCh02G009030	0.252057	-1.98818	0.00368058	0.0285117	down
CmoCh04G000770	2.09904	1.06973	0.00369354	0.0285936	up
CmoCh16G010050	0.322616	-1.63211	0.00369771	0.0286077	down
CmoCh03G000820	0.332767	-1.58742	0.00372376	0.0287532	down
CmoCh01G009720	0.285945	-1.80619	0.00375929	0.0289596	down
CmoCh17G001800	0.431088	-1.21395	0.00376256	0.0289688	down
CmoCh05G008400	0.448514	-1.15677	0.00377266	0.0290373	down
CmoCh13G008910	0.354235	-1.49722	0.00380382	0.0292207	down
CmoCh04G017920	2.65776	1.41021	0.0038082	0.029245	up
CmoCh06G015120	0.257801	-1.95567	0.00382653	0.0293651	down
CmoCh15G014610	0.365899	-1.45048	0.00386039	0.029531	down
CmoCh06G014900	0.327985	-1.6083	0.00386146	0.029531	down
CmoCh02G013670	0.300034	-1.7368	0.00386273	0.0295313	down
CmoCh10G007380	0.471565	-1.08447	0.00386834	0.0295477	down
CmoCh02G001680	0.482204	-1.05228	0.00386858	0.0295477	down
CmoCh12G002100	0.471412	-1.08494	0.00388845	0.0296806	down
CmoCh20G010140	0.489556	-1.03045	0.00389732	0.0297388	down
CmoCh07G005980	0.482126	-1.05252	0.00390481	0.0297864	down
CmoCh10G011150	3.57609	1.83838	0.00391194	0.0298313	up
CmoCh09G012450	0.121027	-3.0466	0.00392326	0.0298987	down
CmoCh07G000360	0.47251	-1.08158	0.00393224	0.029948	down
CmoCh12G000040	0.306433	-1.70636	0.00395089	0.0300614	down
CmoCh19G011440	0.292809	-1.77197	0.00395472	0.0300714	down
CmoCh02G001410	2.33823	1.22542	0.00395735	0.0300819	up
CmoCh03G006550	0.330747	-1.5962	0.00396914	0.0301158	down
CmoCh16G000760	0.232575	-2.10423	0.00396935	0.0301158	down
CmoCh06G001570	0.188431	-2.40789	0.0040095	0.0303532	down
CmoCh01G020360	2.07972	1.05639	0.00401988	0.0304125	up
CmoCh08G002320	0.456225	-1.13218	0.00402544	0.0304253	down
[truncated: 803 more rows]

## Sheet: Table S5
GO_ID	GO_Term	GO_function	GO_class	S gene number	TS gene number	B gene number	TB gene number	pvalue
GO:0005874	microtubule	cellular_component	7	44	2077	138	22345	9.81437e-14
GO:0005871	kinesin complex	cellular_component	5	28	2077	79	22345	1.83913e-10
GO:0042546	cell wall biogenesis	biological_process	5	28	2077	83	22345	6.849e-10
GO:0003777	microtubule motor activity	molecular_function	10	28	2077	83	22345	6.849e-10
GO:0009505	plant-type cell wall	cellular_component	6	31	2077	101	22345	1.22192e-09
GO:0007018	microtubule-based movement	biological_process	5	28	2077	85	22345	1.27375e-09
GO:0008017	microtubule binding	molecular_function	7	32	2077	118	22345	1.94683e-08
GO:0045298	tubulin complex	cellular_component	4	35	2077	137	22345	2.2928e-08
GO:0005618	cell wall	cellular_component	5	55	2077	277	22345	5.0777e-08
GO:0008283	cell population proliferation	biological_process	3	22	2077	70	22345	1.89514e-07
GO:0010411	xyloglucan metabolic process	biological_process	9	17	2077	45	22345	2.35958e-07
GO:0006270	DNA replication initiation	biological_process	8	13	2077	28	22345	3.65858e-07
GO:0046658	anchored component of plasma membrane	cellular_component	6	15	2077	37	22345	4.10753e-07
GO:0048046	apoplast	cellular_component	4	41	2077	194	22345	4.47611e-07
GO:0006012	galactose metabolic process	biological_process	8	26	2077	104	22345	2.19837e-06
GO:0016762	xyloglucan:xyloglucosyl transferase activity	molecular_function	8	15	2077	42	22345	2.76403e-06
GO:0006275	regulation of DNA replication	biological_process	9	13	2077	33	22345	3.5898e-06
GO:0009834	plant-type secondary cell wall biogenesis	biological_process	7	12	2077	29	22345	4.63453e-06
GO:0005982	starch metabolic process	biological_process	9	79	2077	512	22345	4.93727e-06
GO:0005985	sucrose metabolic process	biological_process	8	79	2077	512	22345	4.93727e-06
GO:0018106	peptidyl-histidine phosphorylation	biological_process	10	13	2077	36	22345	1.10897e-05
GO:0030570	pectate lyase activity	molecular_function	7	11	2077	27	22345	1.38988e-05
GO:0009607	response to biotic stimulus	biological_process	4	19	2077	70	22345	1.41162e-05
GO:0046274	lignin catabolic process	biological_process	8	9	2077	19	22345	1.98061e-05
GO:0052716	hydroquinone:oxygen oxidoreductase activity	molecular_function	7	9	2077	19	22345	1.98061e-05
GO:0004673	protein histidine kinase activity	molecular_function	8	9	2077	20	22345	3.30384e-05
GO:0010075	regulation of meristem growth	biological_process	7	21	2077	88	22345	4.28705e-05
GO:0045490	pectin catabolic process	biological_process	8	19	2077	78	22345	7.25033e-05
GO:0009664	plant-type cell wall organization	biological_process	7	19	2077	78	22345	7.25033e-05
GO:0051567	histone H3-K9 methylation	biological_process	13	14	2077	48	22345	7.94507e-05
GO:0000911	cytokinesis by cell plate formation	biological_process	6	16	2077	60	22345	8.33417e-05
GO:0010389	regulation of G2/M transition of mitotic cell cycle	biological_process	9	8	2077	18	22345	0.000102472
GO:0006084	acetyl-CoA metabolic process	biological_process	8	12	2077	38	22345	0.000109448
GO:0006011	UDP-glucose metabolic process	biological_process	6	13	2077	45	22345	0.000158098
GO:0008643	carbohydrate transport	biological_process	7	22	2077	103	22345	0.000166757
GO:0016021	integral component of membrane	cellular_component	5	263	2077	2303	22345	0.000173291
GO:0045492	xylan biosynthetic process	biological_process	11	15	2077	58	22345	0.000199908
GO:0006952	defense response	biological_process	5	24	2077	119	22345	0.000218929
GO:0009932	cell tip growth	biological_process	8	11	2077	35	22345	0.000221105
GO:0010583	response to cyclopentenone	biological_process	7	8	2077	20	22345	0.000248962
GO:0008447	L-ascorbate oxidase activity	molecular_function	7	8	2077	20	22345	0.000248962
GO:0055114	oxidation-reduction process	biological_process	4	226	2077	1956	22345	0.000264931
GO:0015293	symporter activity	molecular_function	7	5	2077	8	22345	0.000304105
GO:0003871	5-methyltetrahydropteroyltriglutamate-homocysteine S-methyltransferase activity	molecular_function	8	4	2077	5	22345	0.000344634
GO:0006687	glycosphingolipid metabolic process	biological_process	9	14	2077	55	22345	0.000385924
GO:0006000	fructose metabolic process	biological_process	8	16	2077	68	22345	0.000401128
GO:0009811	stilbene biosynthetic process	biological_process	7	10	2077	32	22345	0.000448023
GO:0032440	2-alkenal reductase [NAD(P)] activity	molecular_function	7	36	2077	218	22345	0.000494554
GO:0004553	hydrolase activity, hydrolyzing O-glycosyl compounds	molecular_function	6	28	2077	159	22345	0.000719043
GO:0051225	spindle assembly	biological_process	9	7	2077	18	22345	0.000750933
GO:0009809	lignin biosynthetic process	biological_process	8	10	2077	34	22345	0.000766532
GO:0050281	serine-glyoxylate transaminase activity	molecular_function	7	3	2077	3	22345	0.000802046
GO:0005782	peroxisomal matrix	cellular_component	8	3	2077	3	22345	0.000802046
GO:0009815	1-aminocyclopropane-1-carboxylate oxidase activity	molecular_function	7	4	2077	6	22345	0.000957408
GO:0016760	cellulose synthase (UDP-forming) activity	molecular_function	9	11	2077	41	22345	0.000994388
GO:0030955	potassium ion binding	molecular_function	8	6	2077	14	22345	0.000996504
GO:0004743	pyruvate kinase activity	molecular_function	7	6	2077	14	22345	0.000996504
GO:0010413	glucuronoxylan metabolic process	biological_process	11	12	2077	48	22345	0.00117471
GO:0005886	plasma membrane	cellular_component	4	115	2077	937	22345	0.00118982
GO:0009341	beta-galactosidase complex	cellular_component	5	9	2077	30	22345	0.00119534
GO:0004565	beta-galactosidase activity	molecular_function	8	9	2077	30	22345	0.00119534
GO:0006306	DNA methylation	biological_process	10	13	2077	55	22345	0.00130556
GO:0016572	histone phosphorylation	biological_process	10	8	2077	25	22345	0.00140152
GO:0043414	macromolecule methylation	biological_process	5	6	2077	15	22345	0.00153083
GO:0009365	protein histidine kinase complex	cellular_component	8	13	2077	57	22345	0.0018492
GO:0008810	cellulase activity	molecular_function	7	8	2077	26	22345	0.00186119
GO:0030245	cellulose catabolic process	biological_process	11	8	2077	26	22345	0.00186119
GO:0009805	coumarin biosynthetic process	biological_process	8	11	2077	44	22345	0.00186223
GO:0006027	glycosaminoglycan catabolic process	biological_process	8	10	2077	38	22345	0.00196011
GO:0004332	fructose-bisphosphate aldolase activity	molecular_function	7	5	2077	11	22345	0.00197574
GO:0009298	GDP-mannose biosynthetic process	biological_process	10	4	2077	7	22345	0.00206923
GO:0016926	protein desumoylation	biological_process	11	6	2077	16	22345	0.00225798
GO:0051258	protein polymerization	biological_process	8	8	2077	27	22345	0.00243191
GO:0007049	cell cycle	biological_process	4	9	2077	33	22345	0.00249725
GO:0015976	carbon utilization	biological_process	3	19	2077	102	22345	0.00251551
GO:0017177	glucosidase II complex	cellular_component	4	5	2077	12	22345	0.00312905
GO:0050665	hydrogen peroxide biosynthetic process	biological_process	8	6	2077	17	22345	0.00321756
GO:0009506	plasmodesma	cellular_component	5	50	2077	364	22345	0.00336348
GO:0005507	copper ion binding	molecular_function	8	23	2077	136	22345	0.00349451
GO:0004190	aspartic-type endopeptidase activity	molecular_function	8	24	2077	144	22345	0.00351372
GO:0005667	transcription factor complex	cellular_component	4	107	2077	893	22345	0.00371246
GO:0005094	Rho GDP-dissociation inhibitor activity	molecular_function	8	4	2077	8	22345	0.00383435
GO:0016857	racemase and epimerase activity, acting on carbohydrates and derivatives	molecular_function	6	4	2077	8	22345	0.00383435
GO:0042973	glucan endo-1,3-beta-D-glucosidase activity	molecular_function	9	8	2077	29	22345	0.0039766
GO:0005200	structural constituent of cytoskeleton	molecular_function	4	7	2077	24	22345	0.00497019
GO:0006342	chromatin silencing	biological_process	5	7	2077	24	22345	0.00497019
GO:0009750	response to fructose	biological_process	9	10	2077	43	22345	0.00518611
GO:0071555	cell wall organization	biological_process	6	32	2077	215	22345	0.00525783
GO:0019852	L-ascorbic acid metabolic process	biological_process	7	12	2077	57	22345	0.00546358
GO:0052689	carboxylic ester hydrolase activity	molecular_function	6	6	2077	19	22345	0.00600015
GO:0003700	DNA-binding transcription factor activity	molecular_function	4	102	2077	861	22345	0.00629642
GO:0012505	endomembrane system	cellular_component	4	7	2077	25	22345	0.00635801
GO:0005788	endoplasmic reticulum lumen	cellular_component	7	4	2077	9	22345	0.00639645
GO:0006013	mannose metabolic process	biological_process	8	15	2077	80	22345	0.00639892
GO:0004558	alpha-1,4-glucosidase activity	molecular_function	9	3	2077	5	22345	0.0069451
GO:0032450	maltose alpha-glucosidase activity	molecular_function	9	3	2077	5	22345	0.0069451
GO:0004435	phosphatidylinositol phospholipase C activity	molecular_function	9	3	2077	5	22345	0.0069451
GO:0051740	ethylene binding	molecular_function	5	3	2077	5	22345	0.0069451
GO:0046339	diacylglycerol metabolic process	biological_process	9	3	2077	5	22345	0.0069451
GO:0047216	inositol 3-alpha-galactosyltransferase activity	molecular_function	8	3	2077	5	22345	0.0069451
GO:0004617	phosphoglycerate dehydrogenase activity	molecular_function	7	3	2077	5	22345	0.0069451
GO:0008453	alanine-glyoxylate transaminase activity	molecular_function	7	3	2077	5	22345	0.0069451
GO:0048645	animal organ formation	biological_process	5	2	2077	2	22345	0.0086362
GO:0010068	protoderm histogenesis	biological_process	7	2	2077	2	22345	0.0086362
GO:0004489	methylenetetrahydrofolate reductase (NAD(P)H) activity	molecular_function	7	2	2077	2	22345	0.0086362
GO:0010541	acropetal auxin transport	biological_process	9	2	2077	2	22345	0.0086362
GO:0006279	premeiotic DNA replication	biological_process	12	2	2077	2	22345	0.0086362
GO:0010623	programmed cell death involved in cell development	biological_process	6	2	2077	2	22345	0.0086362
GO:0018146	keratan sulfate biosynthetic process	biological_process	9	2	2077	2	22345	0.0086362
GO:0010400	rhamnogalacturonan I side chain metabolic process	biological_process	10	2	2077	2	22345	0.0086362
GO:0032991	protein-containing complex	cellular_component	3	2	2077	2	22345	0.0086362
GO:0001574	ganglioside biosynthetic process	biological_process	11	2	2077	2	22345	0.0086362
GO:0047205	quinate O-hydroxycinnamoyltransferase activity	molecular_function	9	2	2077	2	22345	0.0086362
GO:0003836	beta-galactoside (CMP) alpha-2,3-sialyltransferase activity	molecular_function	7	2	2077	2	22345	0.0086362
GO:0008446	GDP-mannose 4,6-dehydratase activity	molecular_function	7	2	2077	2	22345	0.0086362
GO:0016266	O-glycan processing	biological_process	11	2	2077	2	22345	0.0086362
GO:0004760	serine-pyruvate transaminase activity	molecular_function	7	2	2077	2	22345	0.0086362
GO:0010160	formation of animal organ boundary	biological_process	6	2	2077	2	22345	0.0086362
GO:0009414	response to water deprivation	biological_process	5	13	2077	68	22345	0.00910172
GO:0031225	anchored component of membrane	cellular_component	5	8	2077	33	22345	0.00921628
GO:0045156	electron transporter, transferring electrons within the cyclic electron transport pathway of photosynthesis activity	molecular_function	6	6	2077	21	22345	0.0102151
GO:0000271	polysaccharide biosynthetic process	biological_process	7	8	2077	34	22345	0.011092
GO:0009086	methionine biosynthetic process	biological_process	11	9	2077	41	22345	0.0115534
GO:0016458	gene silencing	biological_process	4	5	2077	16	22345	0.0125989
GO:0050321	tau-protein kinase activity	molecular_function	8	5	2077	16	22345	0.0125989
GO:0015701	bicarbonate transport	biological_process	9	3	2077	6	22345	0.0129328
GO:0005452	inorganic anion exchanger activity	molecular_function	8	3	2077	6	22345	0.0129328
GO:0004805	trehalose-phosphatase activity	molecular_function	9	6	2077	22	22345	0.0129627
GO:0006020	inositol metabolic process	biological_process	7	6	2077	22	22345	0.0129627
GO:0016301	kinase activity	molecular_function	6	29	2077	203	22345	0.013145
GO:0043565	sequence-specific DNA binding	molecular_function	7	56	2077	447	22345	0.0133243
GO:0048229	gametophyte development	biological_process	5	4	2077	11	22345	0.0144013
GO:0030246	carbohydrate binding	molecular_function	4	22	2077	145	22345	0.0149024
GO:0043481	anthocyanin accumulation in tissues in response to UV light	biological_process	10	8	2077	36	22345	0.0156651
GO:0010089	xylem development	biological_process	7	9	2077	43	22345	0.015729
GO:0008299	isoprenoid biosynthetic process	biological_process	8	6	2077	23	22345	0.0161885
GO:0006810	transport	biological_process	5	32	2077	233	22345	0.0164361
GO:0005199	structural constituent of cell wall	molecular_function	4	5	2077	17	22345	0.0165079
GO:0006468	protein phosphorylation	biological_process	9	109	2077	964	22345	0.0180044
GO:0009825	multidimensional cell growth	biological_process	5	9	2077	44	22345	0.0181886
GO:0005992	trehalose biosynthetic process	biological_process	9	6	2077	24	22345	0.0199279
GO:0065007	biological regulation	biological_process	3	4	2077	12	22345	0.0200374
GO:0005215	transporter activity	molecular_function	3	27	2077	193	22345	0.0208839
GO:0051753	mannan synthase activity	molecular_function	9	3	2077	7	22345	0.0210805
GO:0006564	L-serine biosynthetic process	biological_process	12	3	2077	7	22345	0.0210805
GO:0010214	seed coat development	biological_process	5	3	2077	7	22345	0.0210805
GO:0016765	transferase activity, transferring alkyl or aryl (other than methyl) groups	molecular_function	5	3	2077	7	22345	0.0210805
GO:0098656	anion transmembrane transport	biological_process	8	3	2077	7	22345	0.0210805
GO:0005576	extracellular region	cellular_component	3	43	2077	339	22345	0.0226579
GO:0006094	gluconeogenesis	biological_process	9	30	2077	221	22345	0.0227465
GO:0000226	microtubule cytoskeleton organization	biological_process	7	9	2077	46	22345	0.0239256
GO:0008422	beta-glucosidase activity	molecular_function	8	6	2077	25	22345	0.0242132
GO:0016131	brassinosteroid metabolic process	biological_process	8	2	2077	3	22345	0.0243045
GO:0016560	protein import into peroxisome matrix, docking	biological_process	6	2	2077	3	22345	0.0243045
GO:0048037	cofactor binding	molecular_function	4	2	2077	3	22345	0.0243045
GO:0017086	3-methyl-2-oxobutanoate dehydrogenase (lipoamide) complex	cellular_component	4	2	2077	3	22345	0.0243045
GO:0008395	steroid hydroxylase activity	molecular_function	6	2	2077	3	22345	0.0243045
GO:0000234	phosphoethanolamine N-methyltransferase activity	molecular_function	8	2	2077	3	22345	0.0243045
GO:0009150	purine ribonucleotide metabolic process	biological_process	10	2	2077	3	22345	0.0243045
GO:0006515	protein quality control for misfolded or incompletely synthesized proteins	biological_process	9	2	2077	3	22345	0.0243045
GO:0047627	adenylylsulfatase activity	molecular_function	7	2	2077	3	22345	0.0243045
GO:0090447	glycerol-3-phosphate 2-O-acyltransferase activity	molecular_function	8	2	2077	3	22345	0.0243045
GO:0006065	UDP-glucuronate biosynthetic process	biological_process	10	2	2077	3	22345	0.0243045
GO:0003979	UDP-glucose 6-dehydrogenase activity	molecular_function	7	2	2077	3	22345	0.0243045
GO:0003863	3-methyl-2-oxobutanoate dehydrogenase (2-methylpropanoyl-transferring) activity	molecular_function	7	2	2077	3	22345	0.0243045
GO:0047526	2'-hydroxyisoflavone reductase activity	molecular_function	7	2	2077	3	22345	0.0243045
GO:0006384	transcription initiation from RNA polymerase III promoter	biological_process	9	2	2077	3	22345	0.0243045
GO:0008466	glycogenin glucosyltransferase activity	molecular_function	8	2	2077	3	22345	0.0243045
GO:0080116	glucuronoxylan glucuronosyltransferase activity	molecular_function	8	2	2077	3	22345	0.0243045
GO:0038199	ethylene receptor activity	molecular_function	5	2	2077	3	22345	0.0243045
GO:0006656	phosphatidylcholine biosynthetic process	biological_process	10	2	2077	3	22345	0.0243045
GO:0032259	methylation	biological_process	4	34	2077	259	22345	0.0253269
GO:0022891	transmembrane transporter activity	NA	NA	10	2077	54	22345	0.0255267
GO:0010540	basipetal auxin transport	biological_process	9	4	2077	13	22345	0.0268547
GO:0009055	electron transfer activity	molecular_function	5	27	2077	198	22345	0.0280196
GO:0030244	cellulose biosynthetic process	biological_process	11	15	2077	95	22345	0.0288395
GO:0008152	metabolic process	biological_process	3	185	2077	1745	22345	0.0293596
GO:0016706	2-oxoglutarate-dependent dioxygenase activity	molecular_function	6	13	2077	79	22345	0.0297058
GO:0016126	sterol biosynthetic process	biological_process	8	12	2077	71	22345	0.0297736
GO:0047672	anthranilate N-benzoyltransferase activity	molecular_function	7	3	2077	8	22345	0.0314282
GO:1901564	organonitrogen compound metabolic process	biological_process	5	3	2077	8	22345	0.0314282
GO:0009741	response to brassinosteroid	biological_process	6	3	2077	8	22345	0.0314282
GO:0010289	homogalacturonan biosynthetic process	biological_process	9	3	2077	8	22345	0.0314282
GO:0032147	activation of protein kinase activity	biological_process	12	3	2077	8	22345	0.0314282
GO:0005819	spindle	cellular_component	6	5	2077	20	22345	0.0327695
GO:0016132	brassinosteroid biosynthetic process	biological_process	9	8	2077	41	22345	0.0327783
GO:0007017	microtubule-based process	biological_process	4	8	2077	41	22345	0.0327783
GO:0009832	plant-type cell wall biogenesis	biological_process	6	7	2077	34	22345	0.0341891
GO:0003950	NAD+ ADP-ribosyltransferase activity	molecular_function	7	6	2077	27	22345	0.034531
GO:0047134	protein-disulfide reductase activity	molecular_function	7	4	2077	14	22345	0.0348945
GO:0008361	regulation of cell size	biological_process	6	6	2077	28	22345	0.0406082
GO:0010468	regulation of gene expression	biological_process	7	6	2077	28	22345	0.0406082
GO:0019752	carboxylic acid metabolic process	biological_process	7	3	2077	9	22345	0.043944
GO:0033612	receptor serine/threonine kinase binding	molecular_function	6	3	2077	9	22345	0.043944
GO:0010105	negative regulation of ethylene-activated signaling pathway	biological_process	11	3	2077	9	22345	0.043944
GO:2000026	regulation of multicellular organismal development	biological_process	6	3	2077	9	22345	0.043944
GO:0009835	fruit ripening	biological_process	5	3	2077	9	22345	0.043944
GO:2000112	regulation of cellular macromolecule biosynthetic process	biological_process	8	3	2077	9	22345	0.043944
GO:0000910	cytokinesis	biological_process	5	3	2077	9	22345	0.043944
GO:0010143	cutin biosynthetic process	biological_process	7	3	2077	9	22345	0.043944
GO:0010315	auxin efflux	biological_process	9	3	2077	9	22345	0.043944
GO:0001575	globoside metabolic process	biological_process	10	4	2077	15	22345	0.0441771
GO:0048829	root cap development	biological_process	5	4	2077	15	22345	0.0441771
GO:0003825	alpha,alpha-trehalose-phosphate synthase (UDP-forming) activity	molecular_function	8	4	2077	15	22345	0.0441771
GO:0042409	caffeoyl-CoA O-methyltransferase activity	molecular_function	8	2	2077	4	22345	0.0456242
GO:0004476	mannose-6-phosphate isomerase activity	molecular_function	7	2	2077	4	22345	0.0456242
GO:0010117	photoprotection	biological_process	7	2	2077	4	22345	0.0456242
GO:0070734	histone H3-K27 methylation	biological_process	13	2	2077	4	22345	0.0456242
GO:0000796	condensin complex	cellular_component	6	2	2077	4	22345	0.0456242
GO:0003983	UTP:glucose-1-phosphate uridylyltransferase activity	molecular_function	9	2	2077	4	22345	0.0456242
GO:0050291	sphingosine N-acyltransferase activity	molecular_function	8	2	2077	4	22345	0.0456242
GO:0071484	cellular response to light intensity	biological_process	8	2	2077	4	22345	0.0456242
GO:0046976	histone methyltransferase activity (H3-K27 specific	molecular_function	10	2	2077	4	22345	0.0456242
GO:0051179	localization	biological_process	3	2	2077	4	22345	0.0456242
GO:0052841	inositol bisdiphosphate tetrakisphosphate diphosphatase activity	molecular_function	8	2	2077	4	22345	0.0456242
GO:0047172	shikimate O-hydroxycinnamoyltransferase activity	molecular_function	9	2	2077	4	22345	0.0456242
GO:0016554	cytidine to uridine editing	biological_process	11	2	2077	4	22345	0.0456242
GO:0052842	inositol diphosphate pentakisphosphate diphosphatase activity	molecular_function	8	2	2077	4	22345	0.0456242
GO:0006355	regulation of transcription, DNA-templated	biological_process	8	167	2077	1589	22345	0.0477218
GO:0006096	glycolytic process	biological_process	10	27	2077	208	22345	0.0477236
GO:0042967	obsolete acyl-carrier-protein biosynthetic process	biological_process	NA	31	2077	245	22345	0.0482598

## Sheet: Table S6
pathway_id	pathway_name	S gene number	TS gene number	B gene number	TB gene number	pvalue
ko00500	Starch and sucrose metabolism	64	895	399	10028	2.2277e-06
ko00520	Amino sugar and nucleotide sugar metabolism	44	895	244	10028	4.37517e-06
ko00604	Glycosphingolipid biosynthesis - ganglio series	17	895	75	10028	0.000256967
ko00511	Other glycan degradation	25	895	141	10028	0.000647425
ko00100	Steroid biosynthesis	12	895	48	10028	0.000806019
ko00531	Glycosaminoglycan degradation	18	895	97	10028	0.00210195
ko00402	Benzoxazinoid biosynthesis	4	895	8	10028	0.00329126
ko04141	Protein processing in endoplasmic reticulum	52	895	399	10028	0.00332818
ko00052	Galactose metabolism	29	895	195	10028	0.00421347
ko00010	Glycolysis / Gluconeogenesis	29	895	203	10028	0.0074427
ko00270	Cysteine and methionine metabolism	27	895	188	10028	0.00895024
ko00940	Phenylpropanoid biosynthesis	38	895	288	10028	0.00915106
ko00051	Fructose and mannose metabolism	18	895	112	10028	0.0100071
ko03440	Homologous recombination	20	895	130	10028	0.0110521
ko03030	DNA replication	14	895	87	10028	0.0213113
ko00600	Sphingolipid metabolism	18	895	125	10028	0.0284712
ko00710	Carbon fixation in photosynthetic organisms	18	895	128	10028	0.0350718
ko00196	Photosynthesis - antenna proteins	7	895	36	10028	0.0372702
ko00905	Brassinosteroid biosynthesis	5	895	22	10028	0.0410032
