# Supplementary material for: Integrated Transcriptome and Metabolome Analysis Reveals an Essential Role for Auxin in Hypocotyl Elongation during End-of-Day Far-Red Treatment of Cucurbita moschata (Duch. Ex Lam.)
Source: MDPI journal article supplement (doi:10.3390/agronomy11050853), 2021-04-27

**Compound name: IAA**

**Regression Equation:  $y = 0.18268 x + 0.01360$  ( $r = 0.99922$ )**  
**(weighting:  $1 / x$ )**

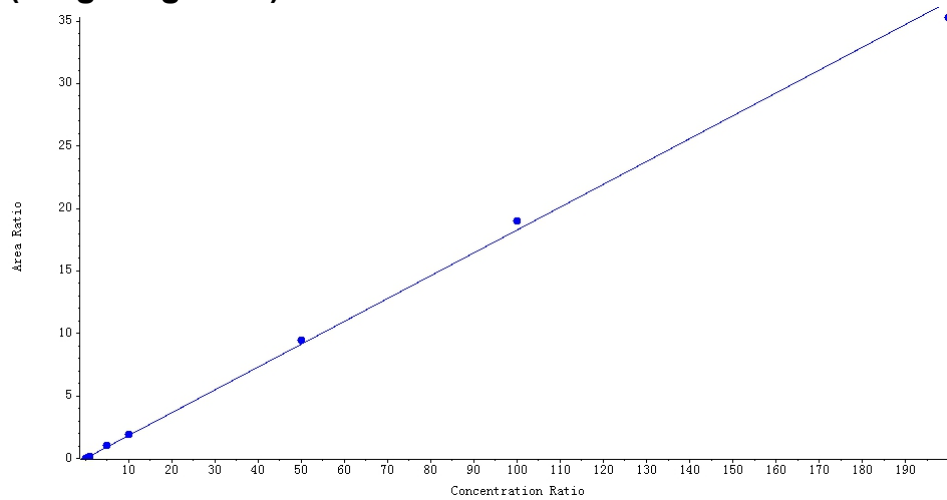

**Compound name: ME-IAA**

**Regression Equation:  $y = 0.26999 x + 0.00329$  ( $r = 0.99731$ )**  
**(weighting:  $1 / x$ )**

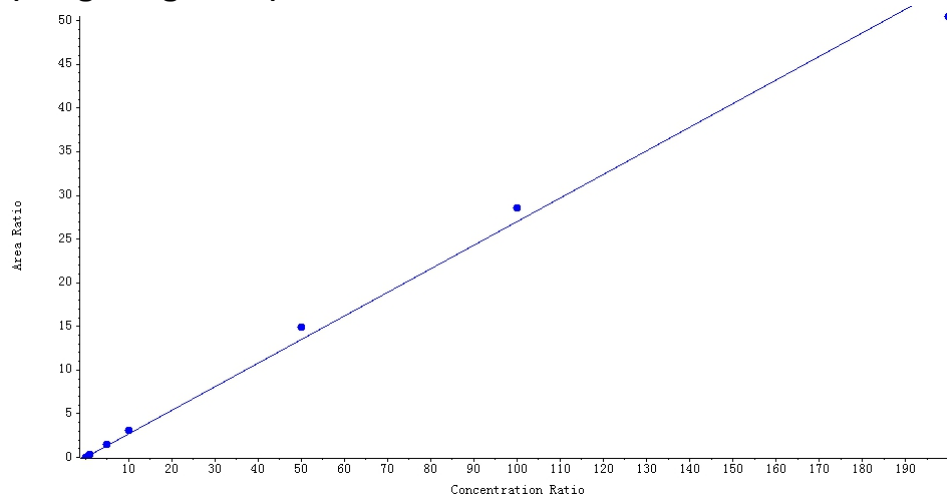

Supplement: s1 [file s1 › Fig S1.pdf]
