# Supplementary figures and images for: Integrated Transcriptome and Metabolome Analysis Reveals an Essential Role for Auxin in Hypocotyl Elongation during End-of-Day Far-Red Treatment of Cucurbita moschata (Duch. Ex Lam.)
Source: MDPI journal article supplement (doi:10.3390/agronomy11050853), 2021-04-27

# Statistics of Pathway Enrichment

pathway\_name

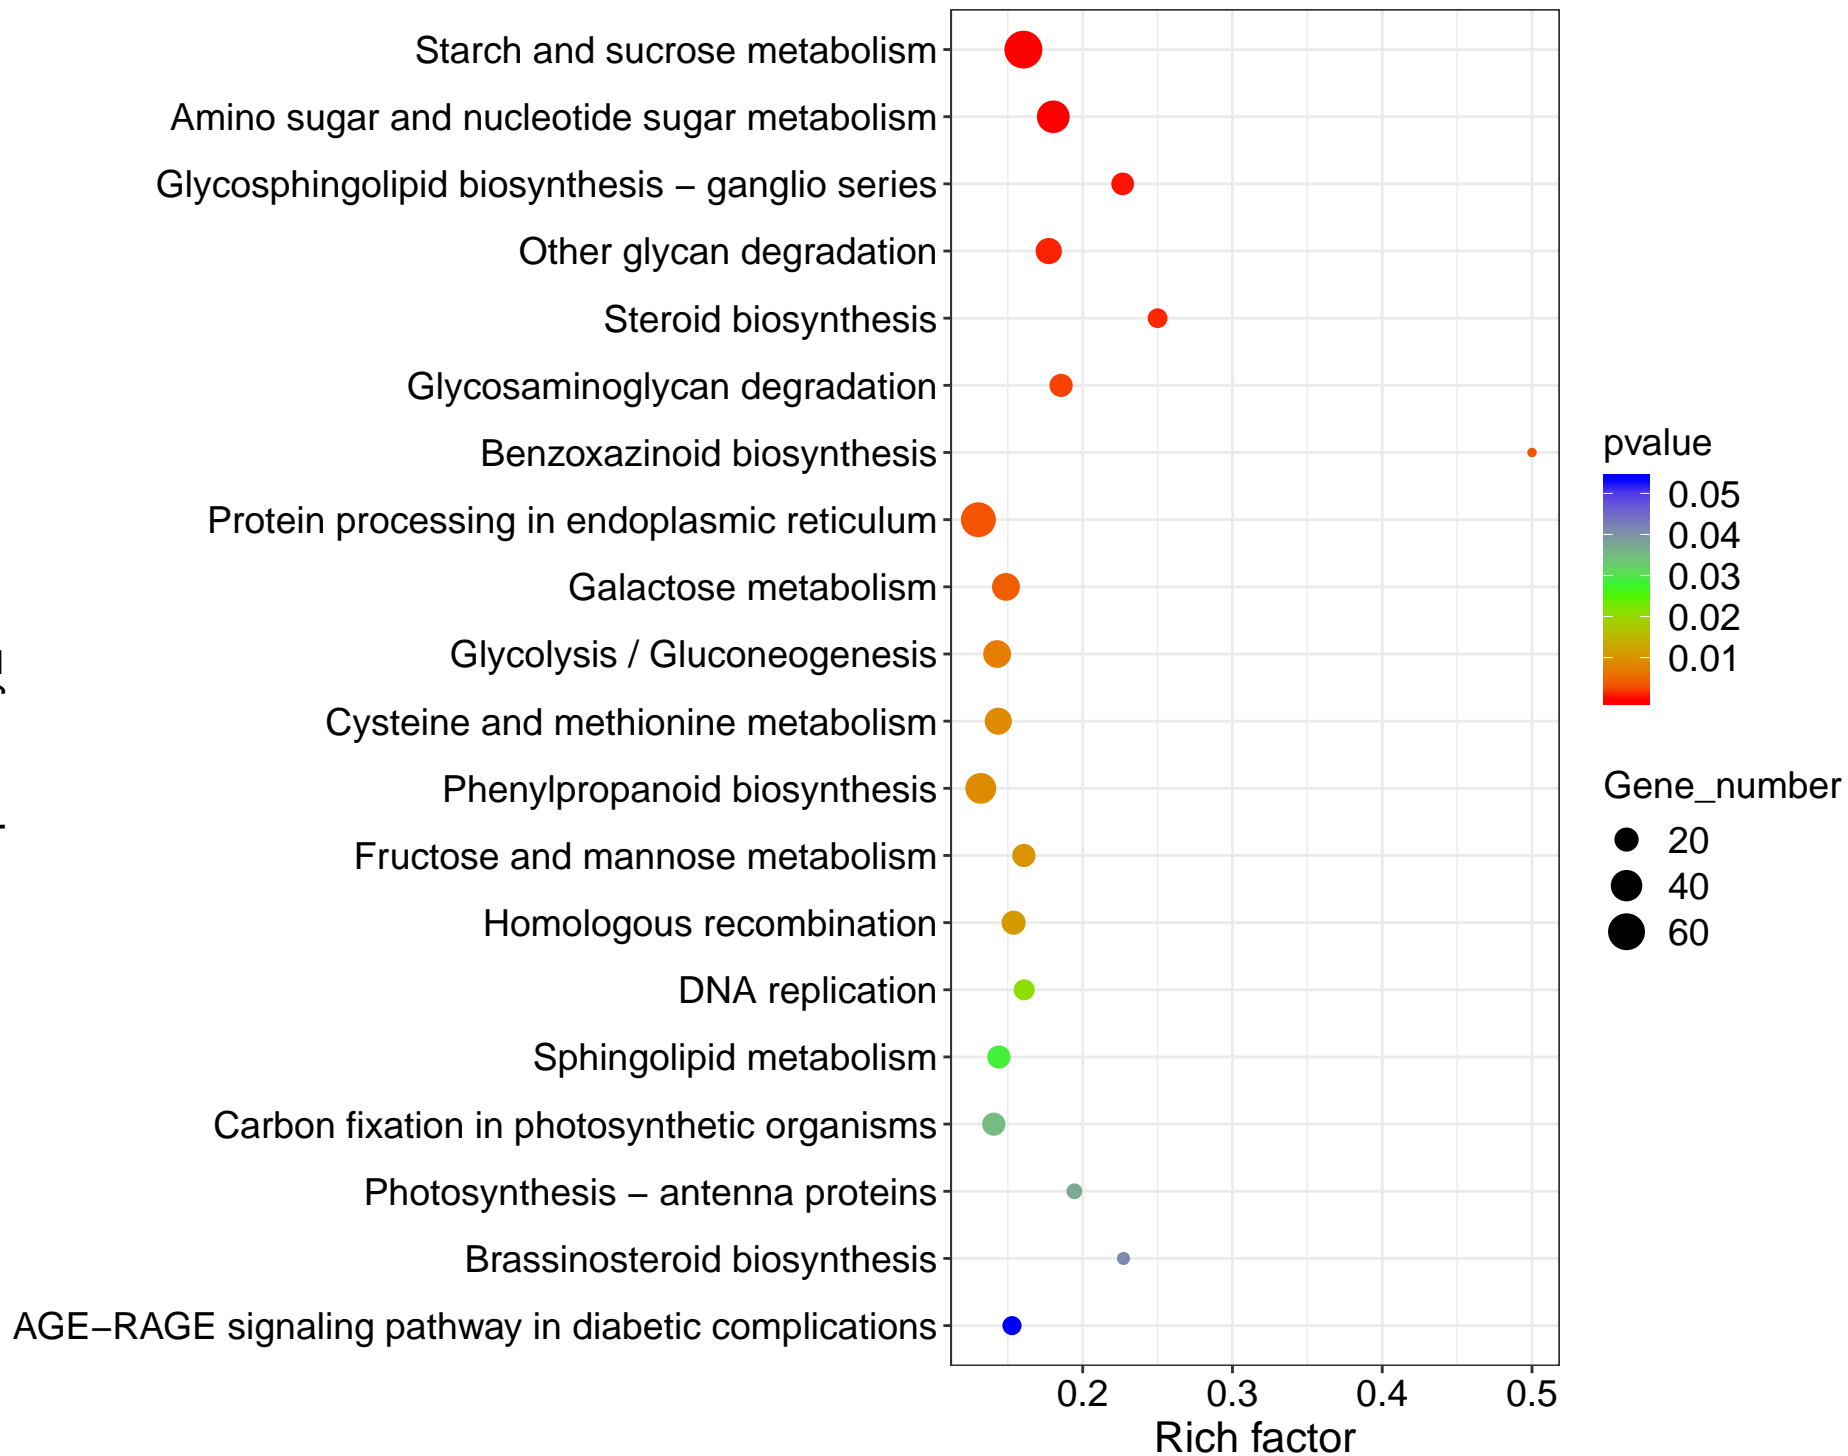

Supplement: s1 [file s1]

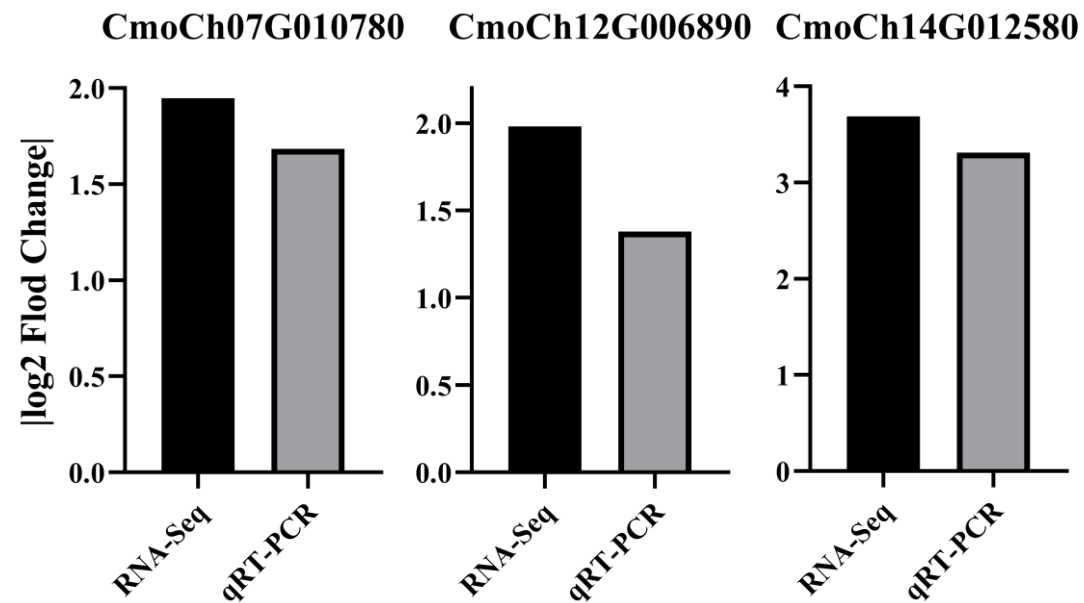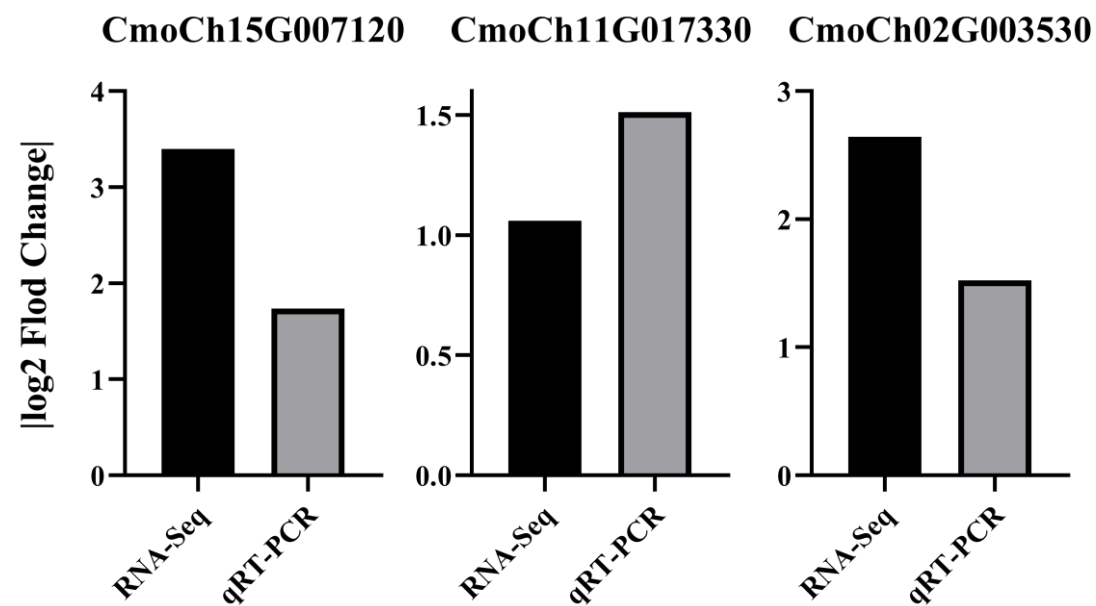

Supplement: s1 [file s1]

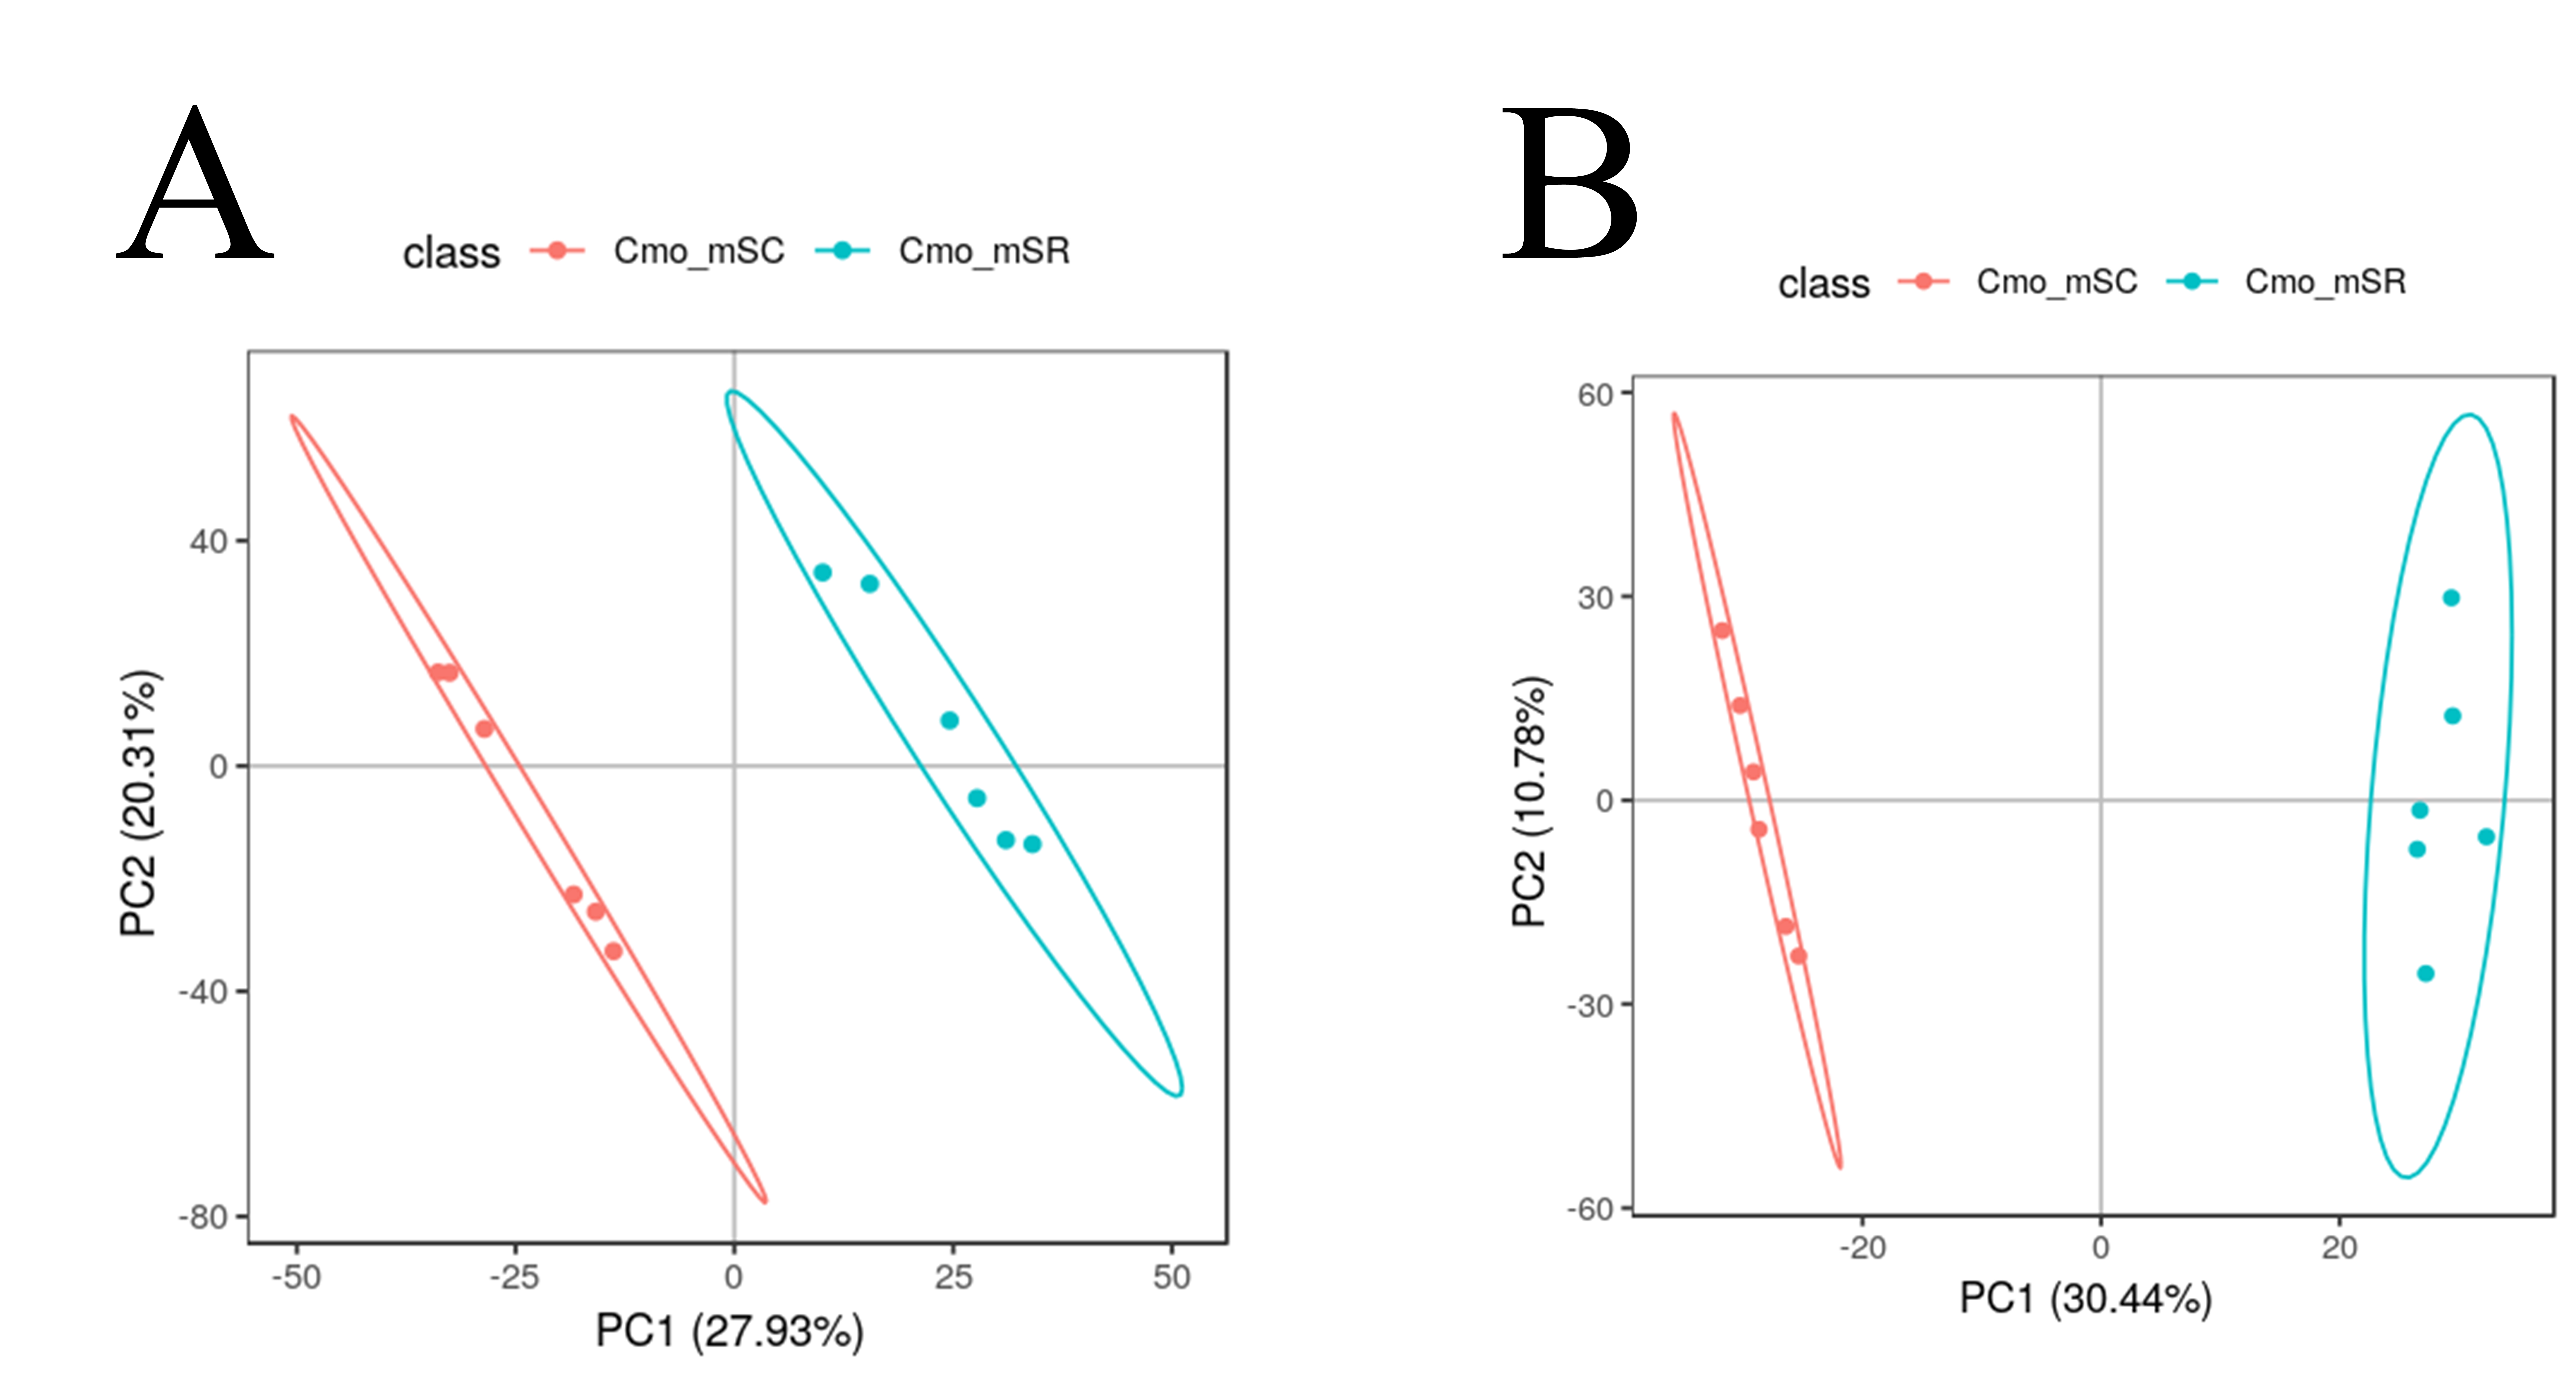

Supplement: s1 [file s1 › Fig S3.jpg]

# Statistics of GO Enrichment

GO\_Term

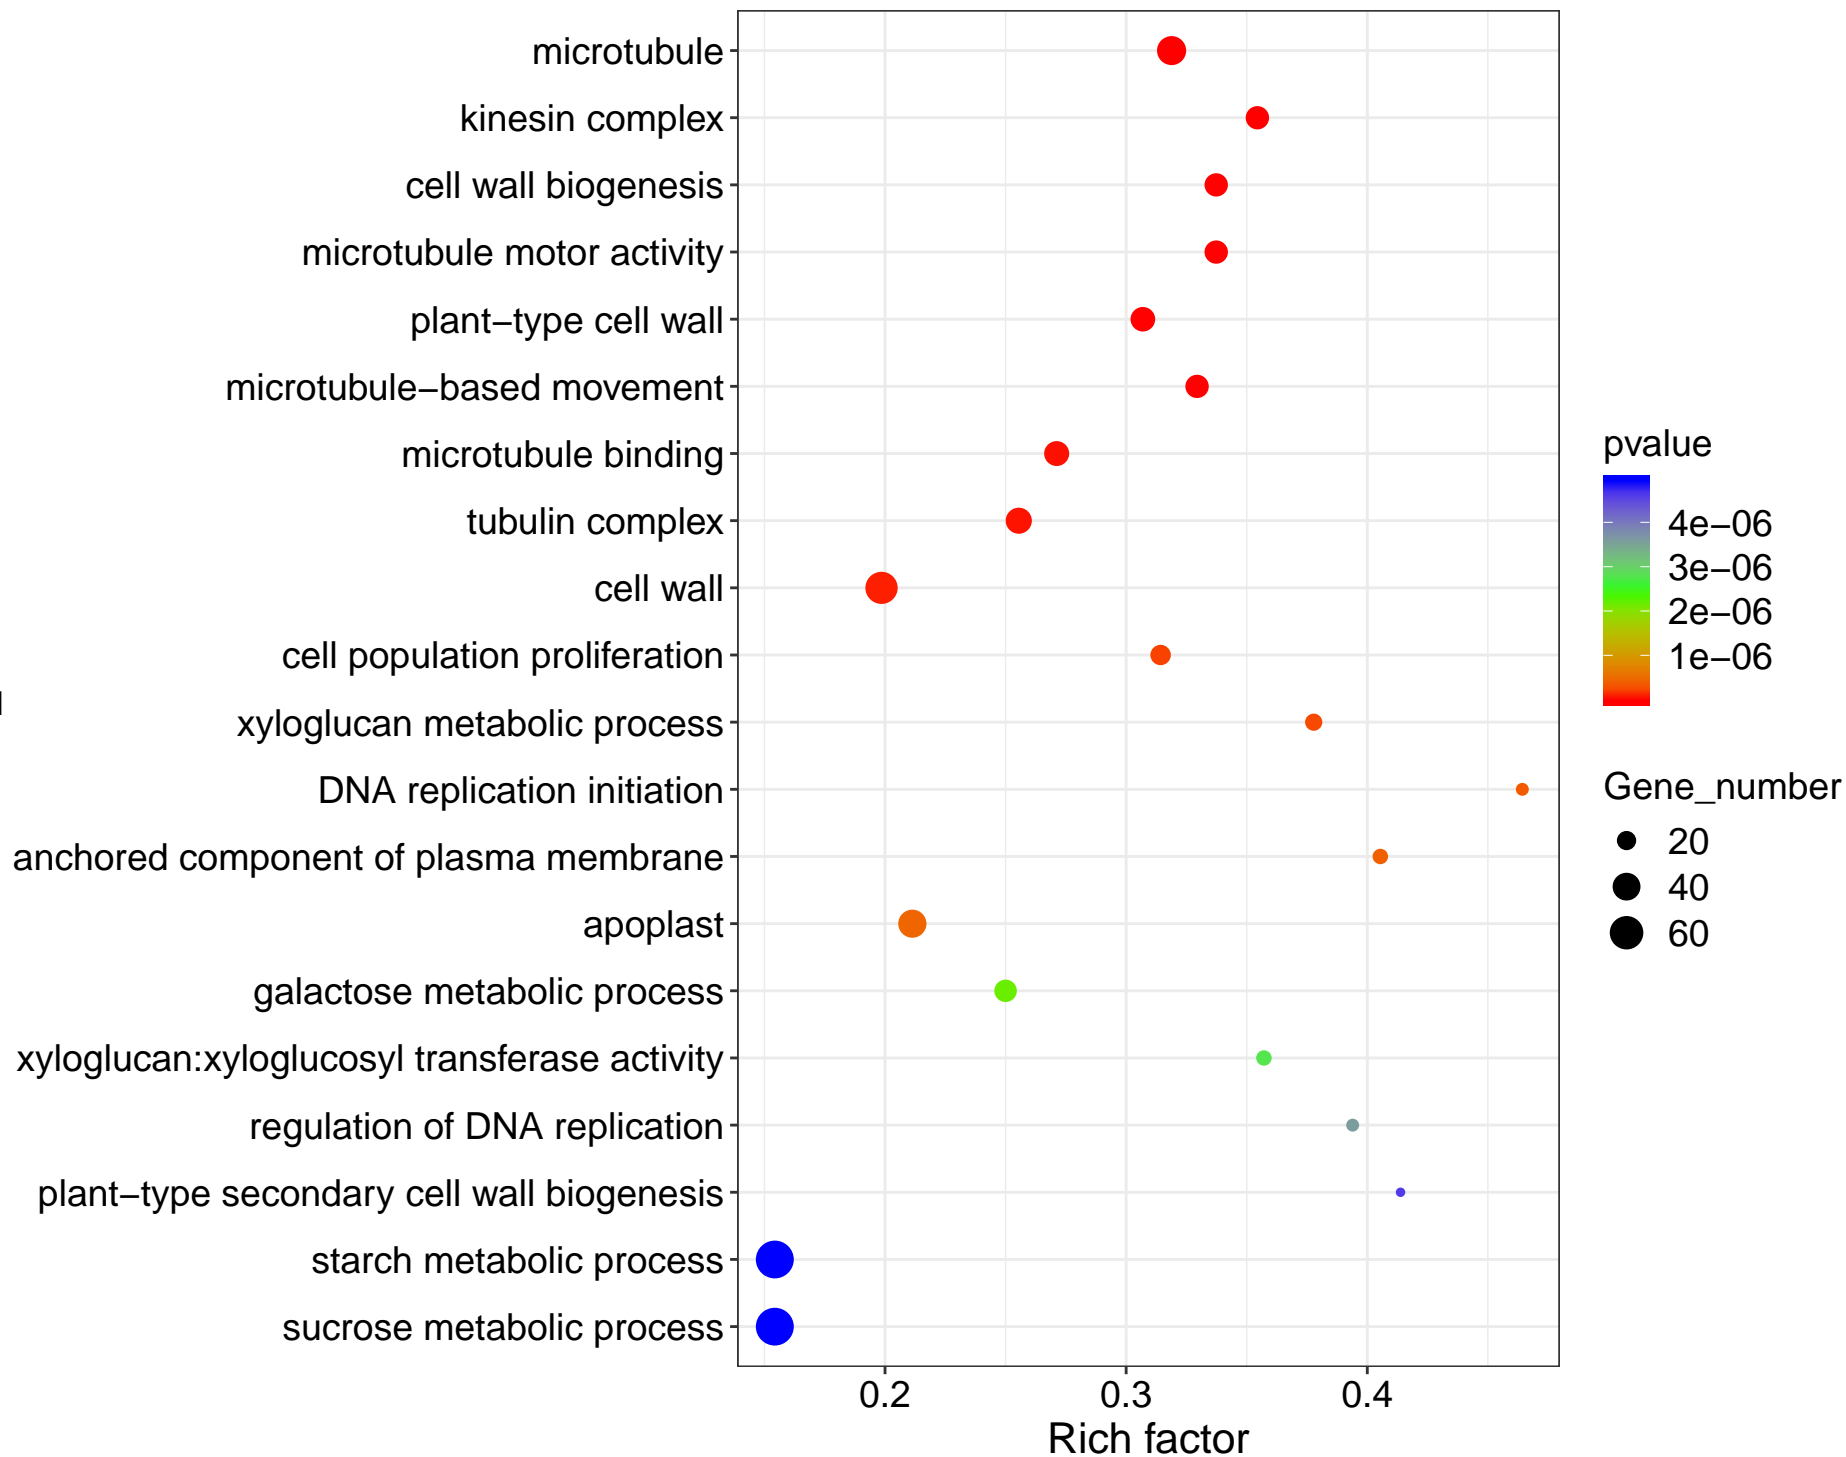

Supplement: s1 [file s1 › Fig S6.pdf]

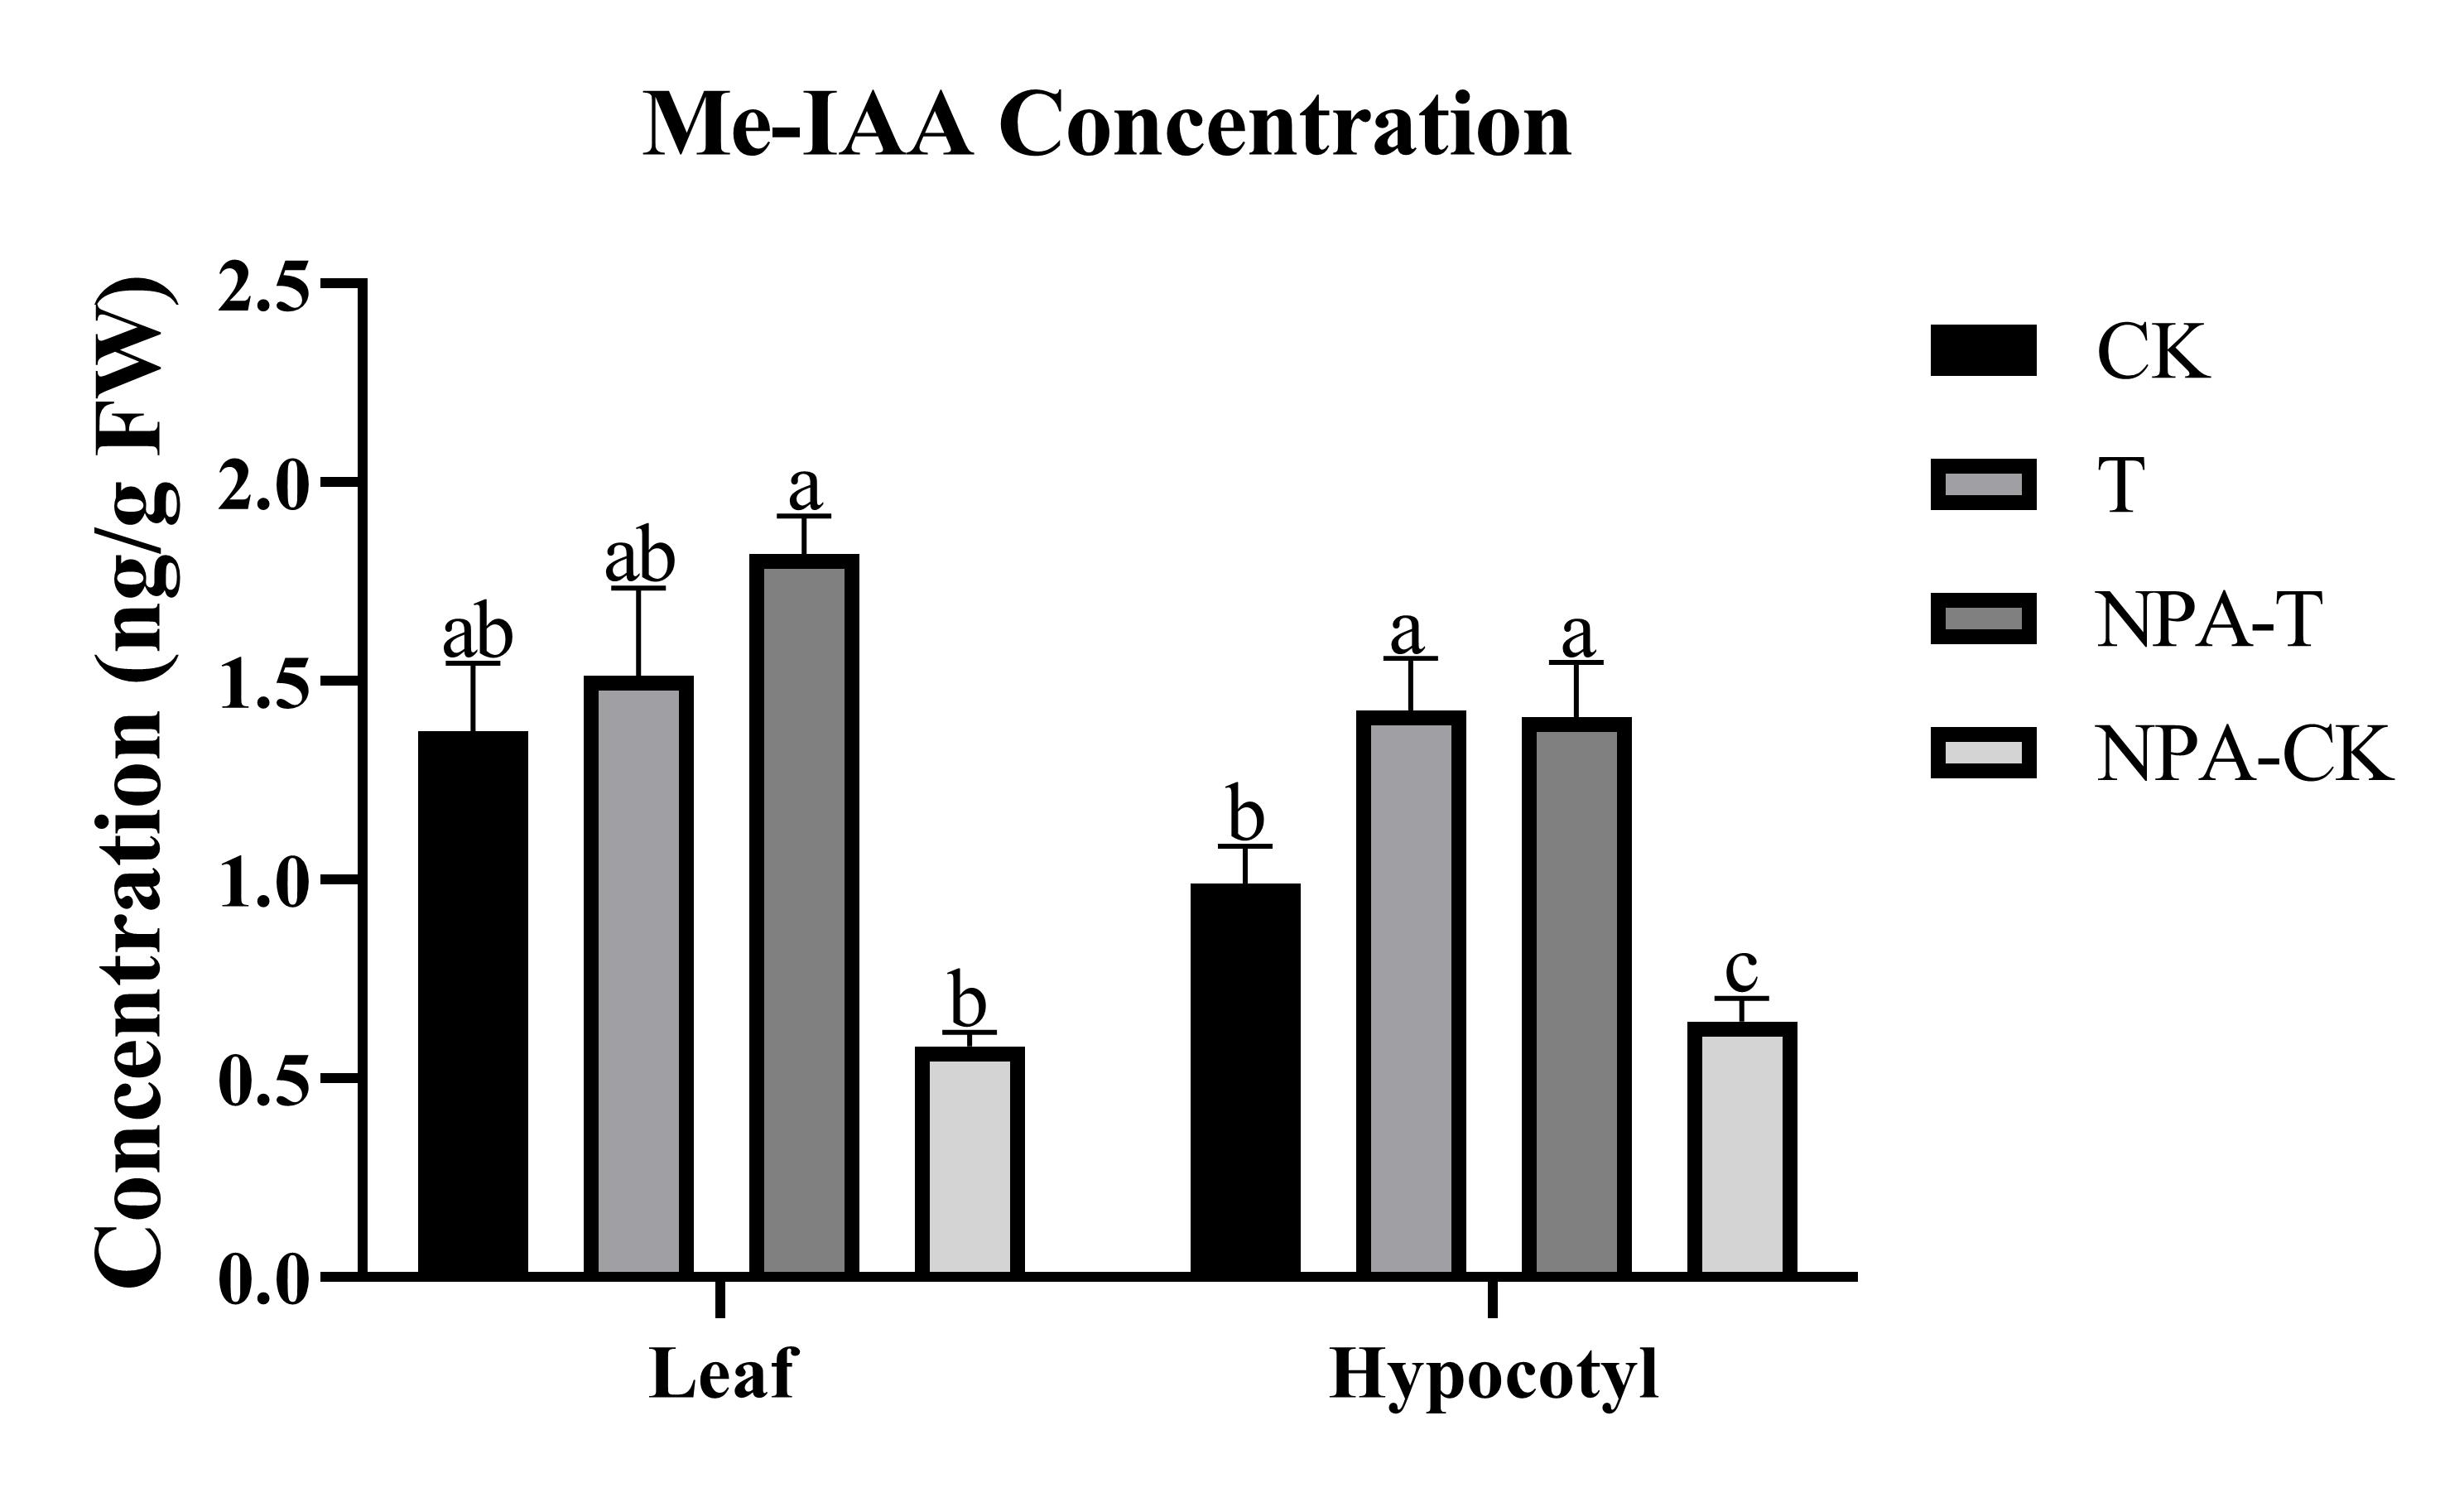

Supplement: s1 [file s1 › Figure S2.jpg]

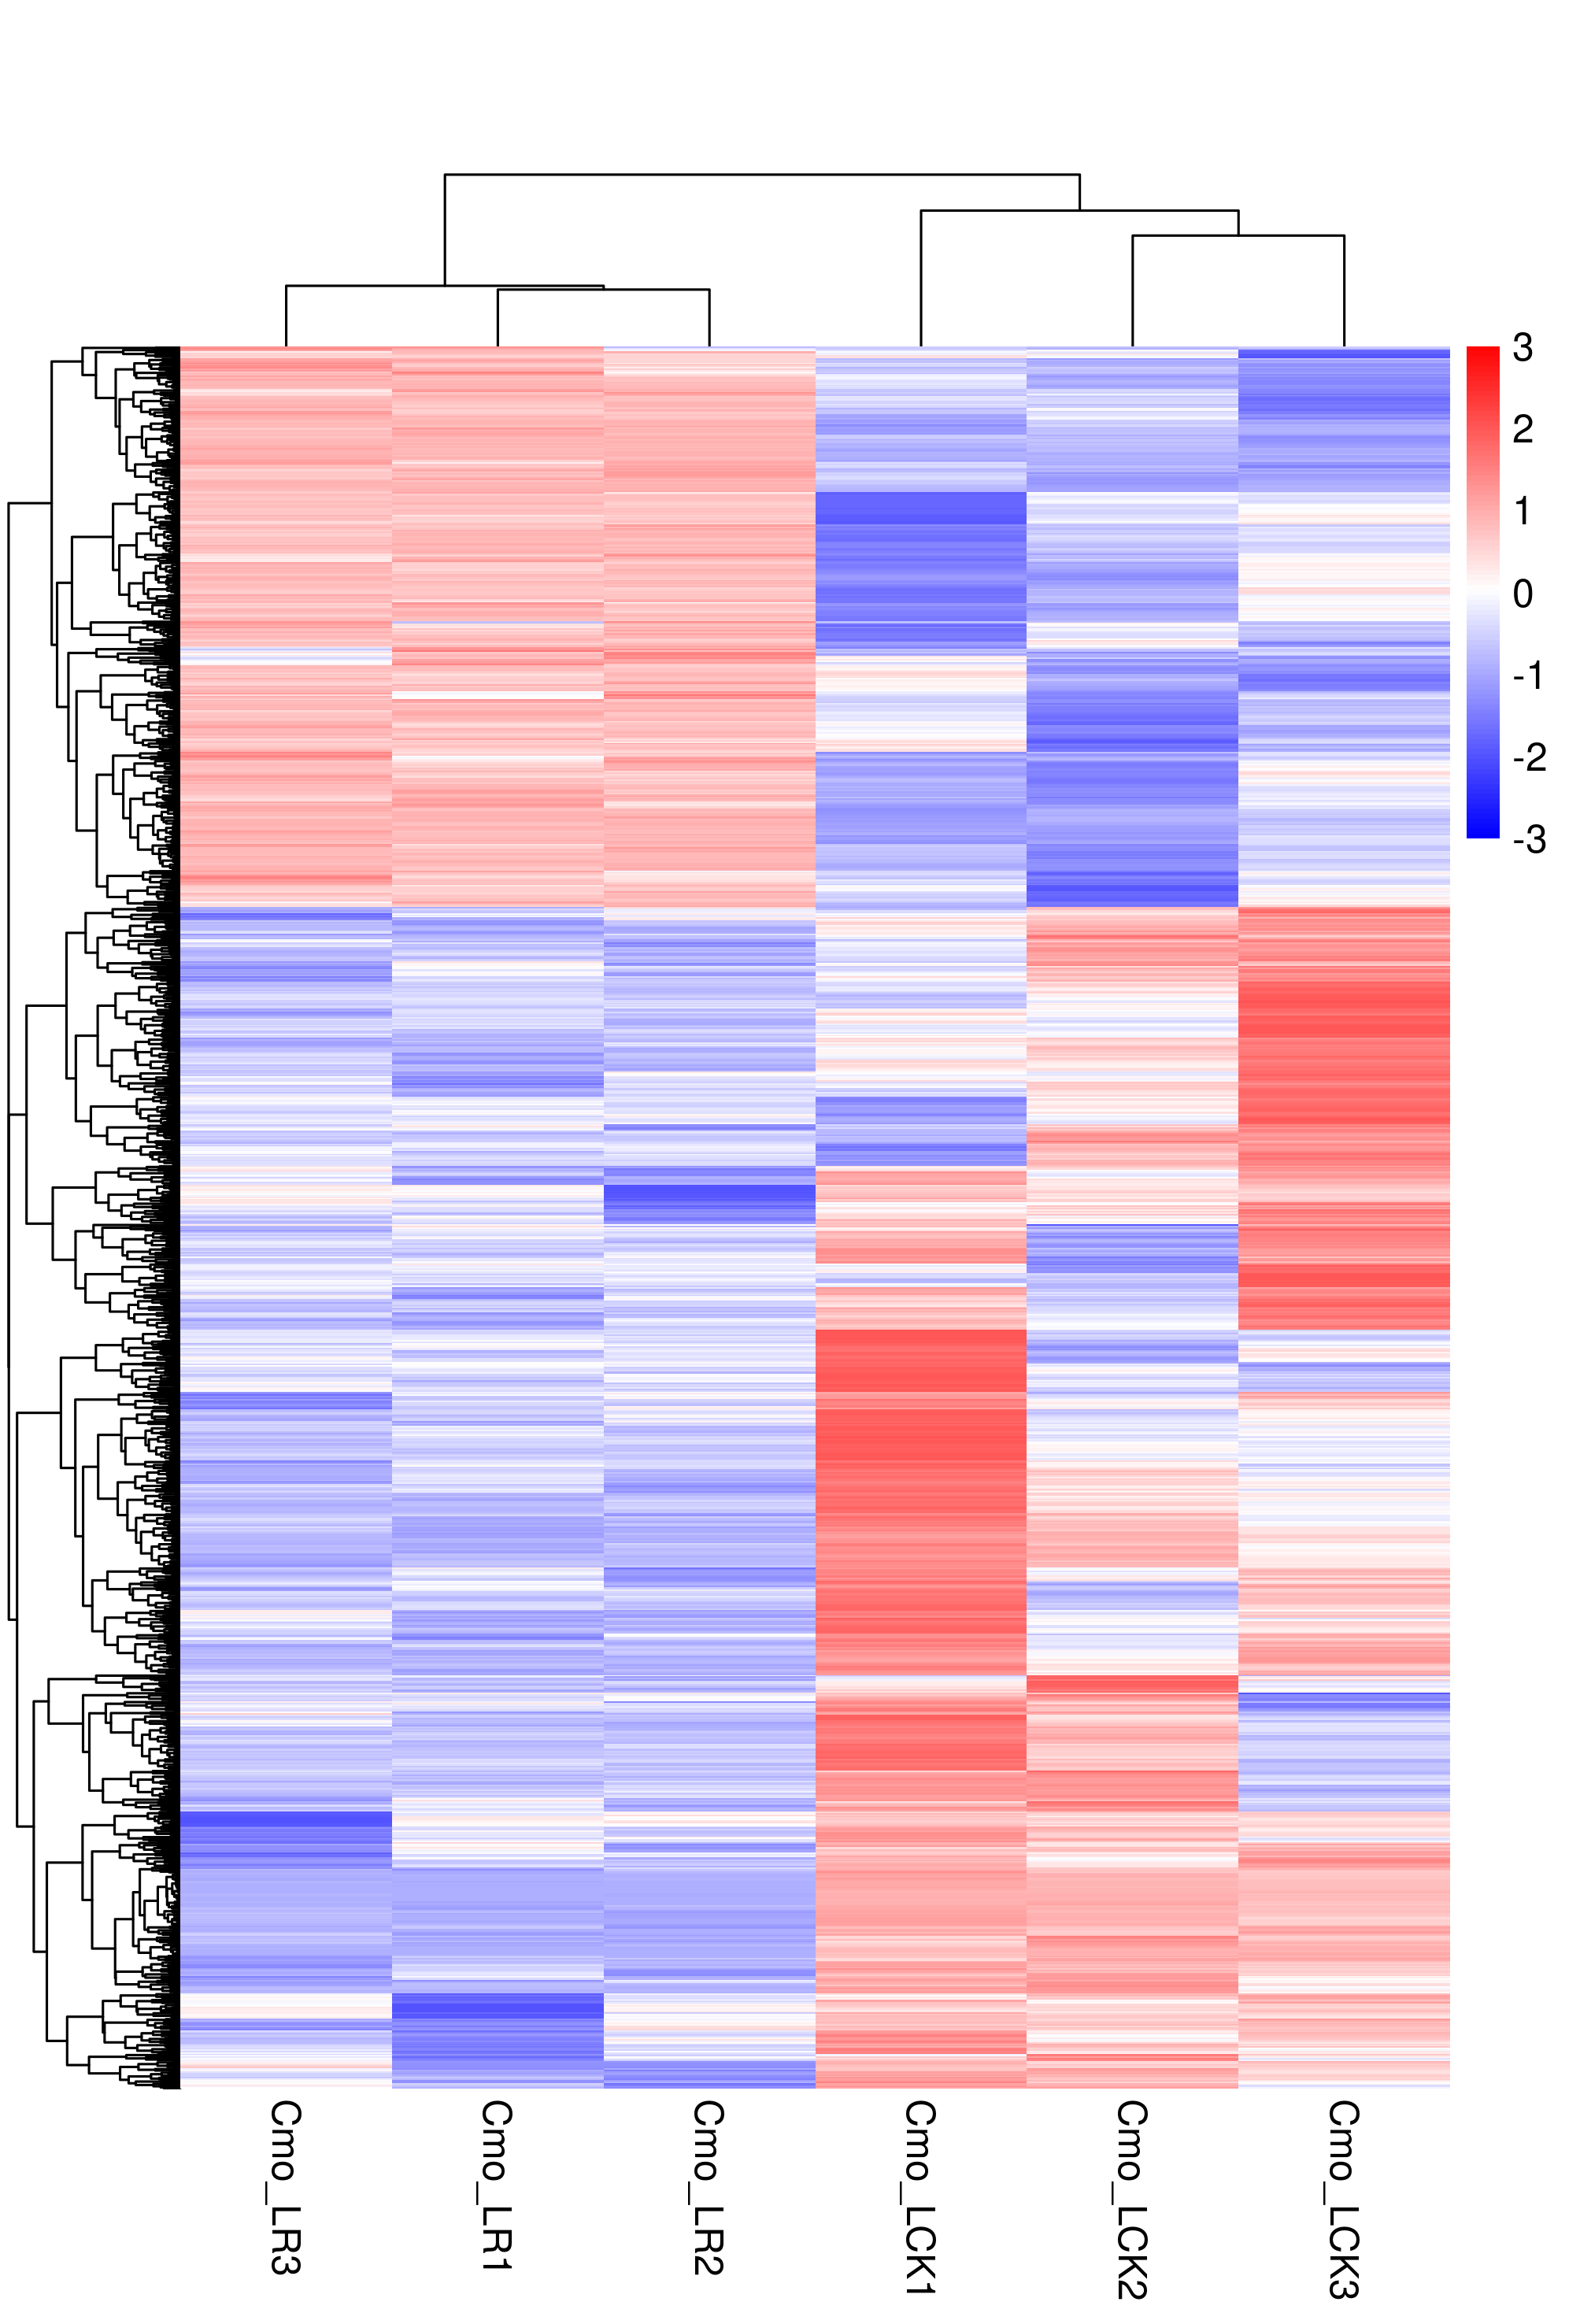

Supplement: s1 [file s1 › Figure S4.tiff]

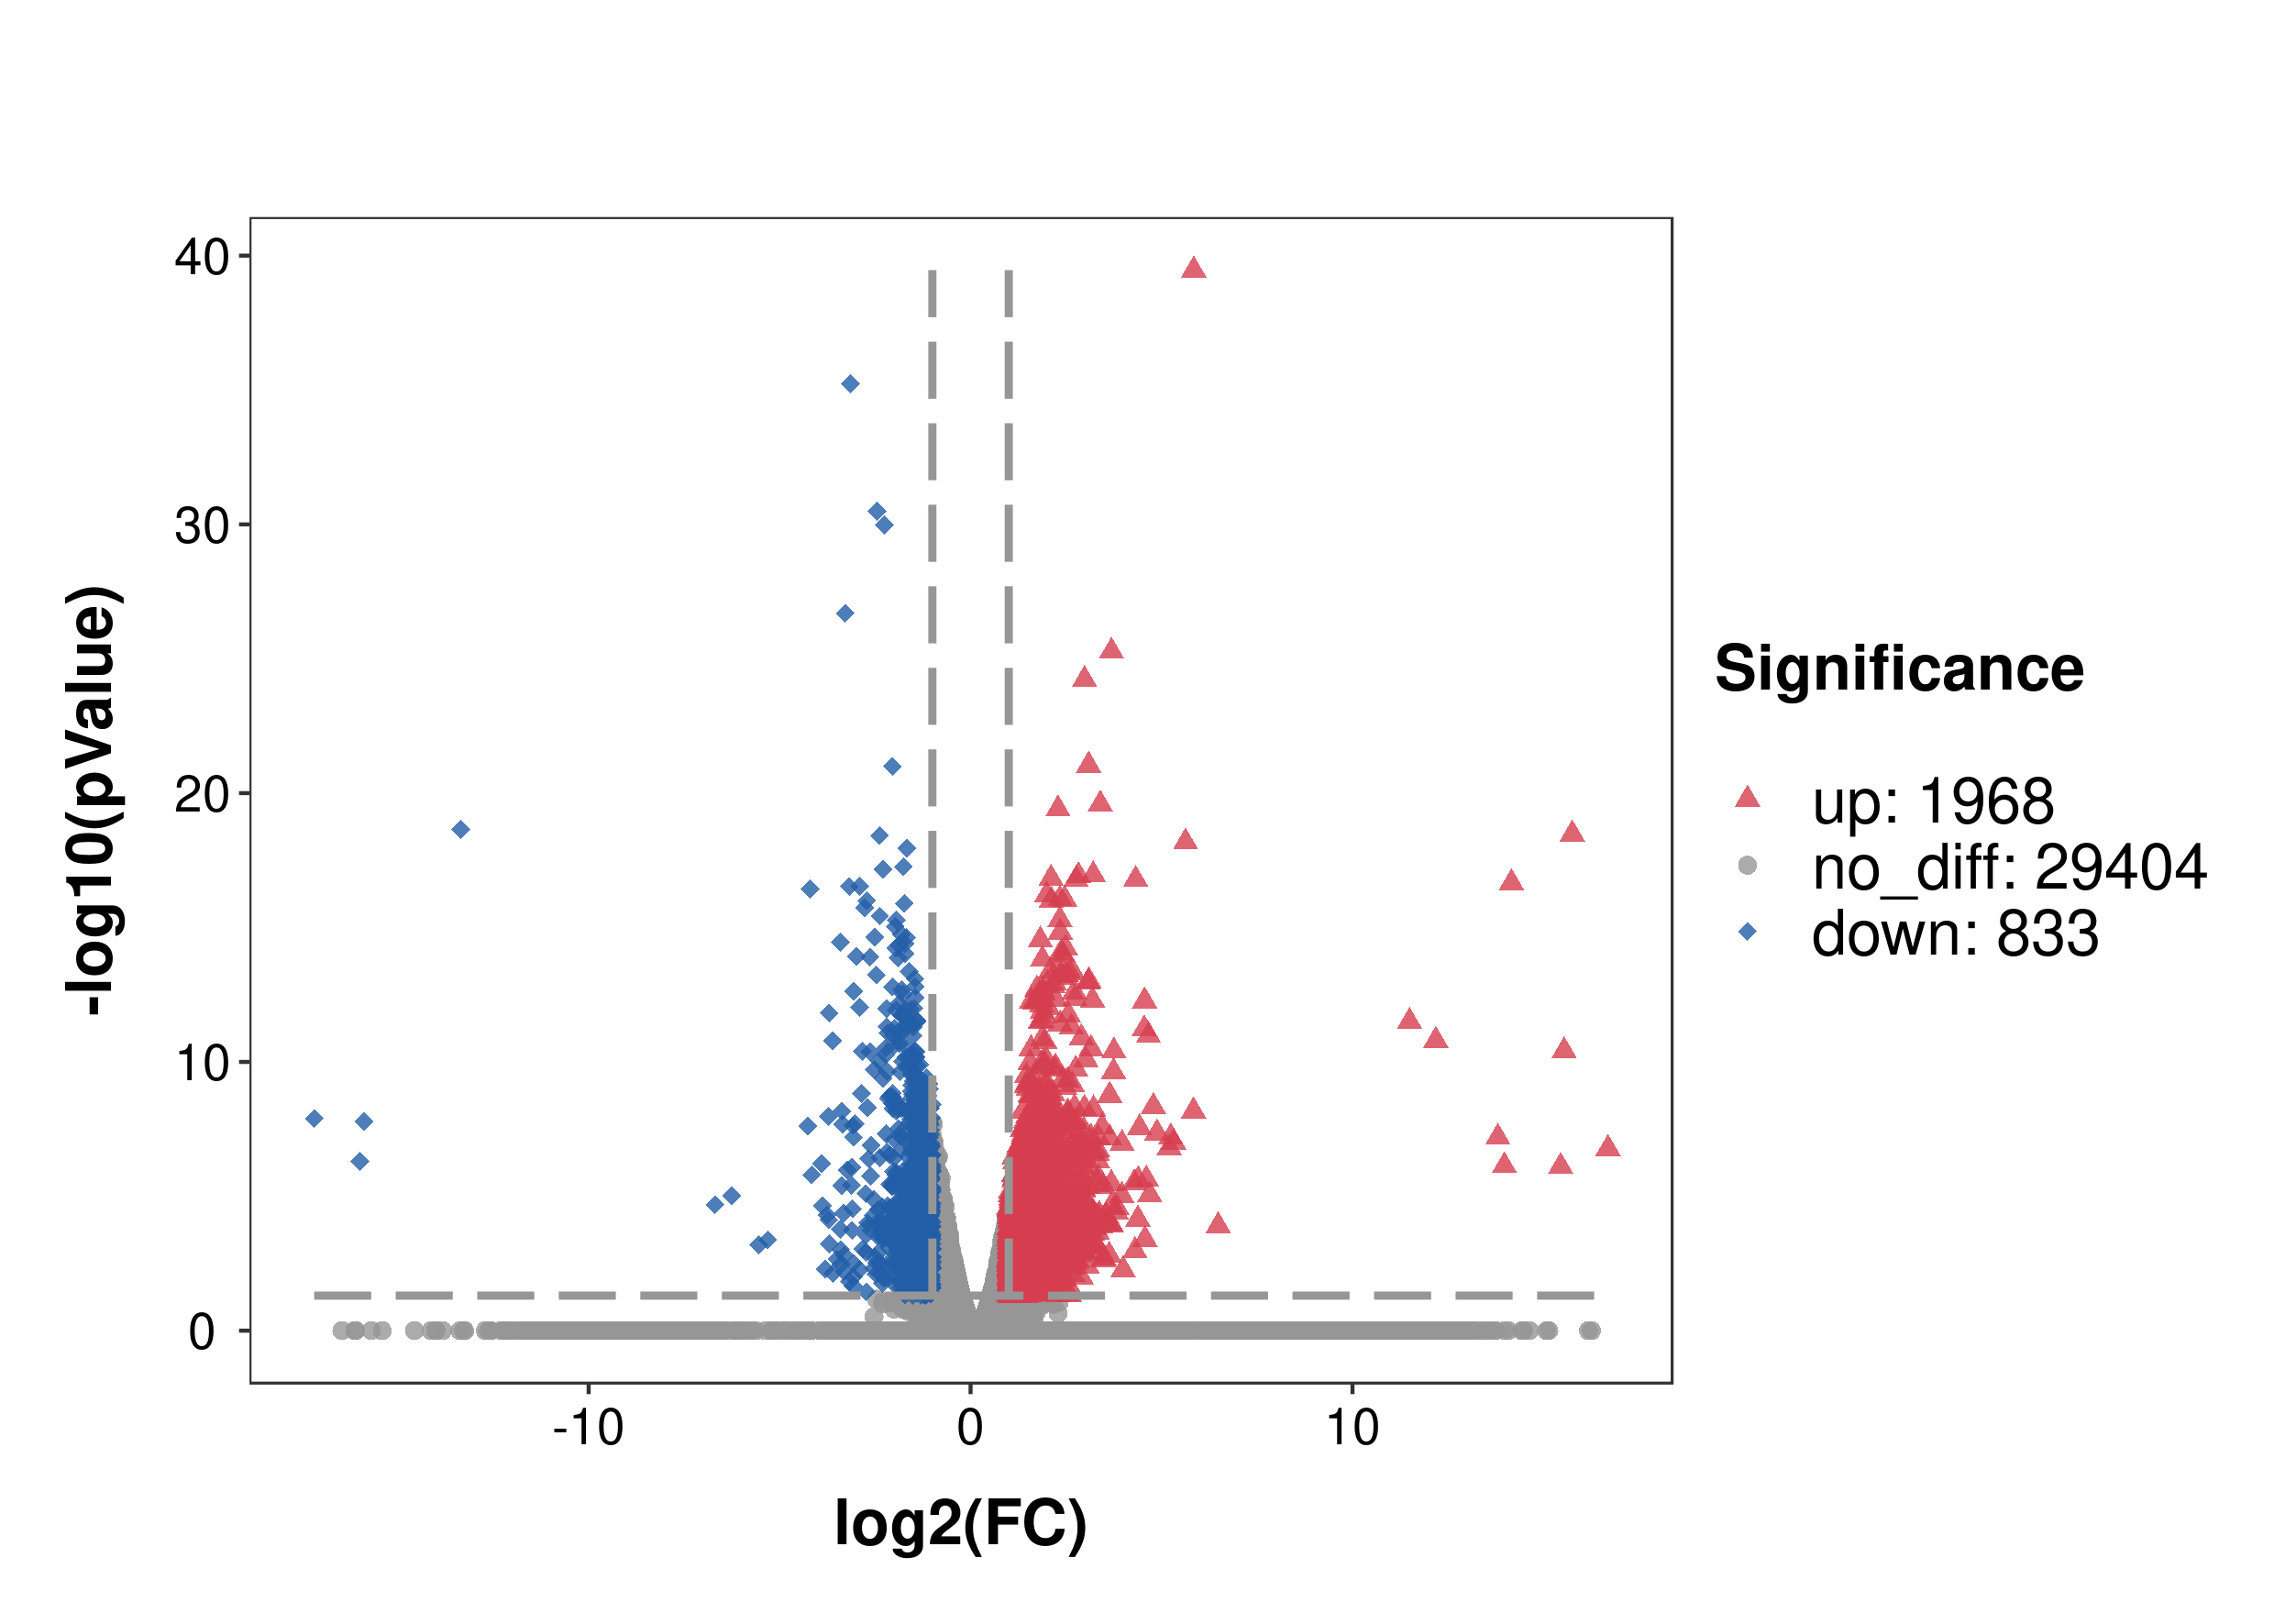

Supplement: s1 [file s1 › Figure S5.tiff]

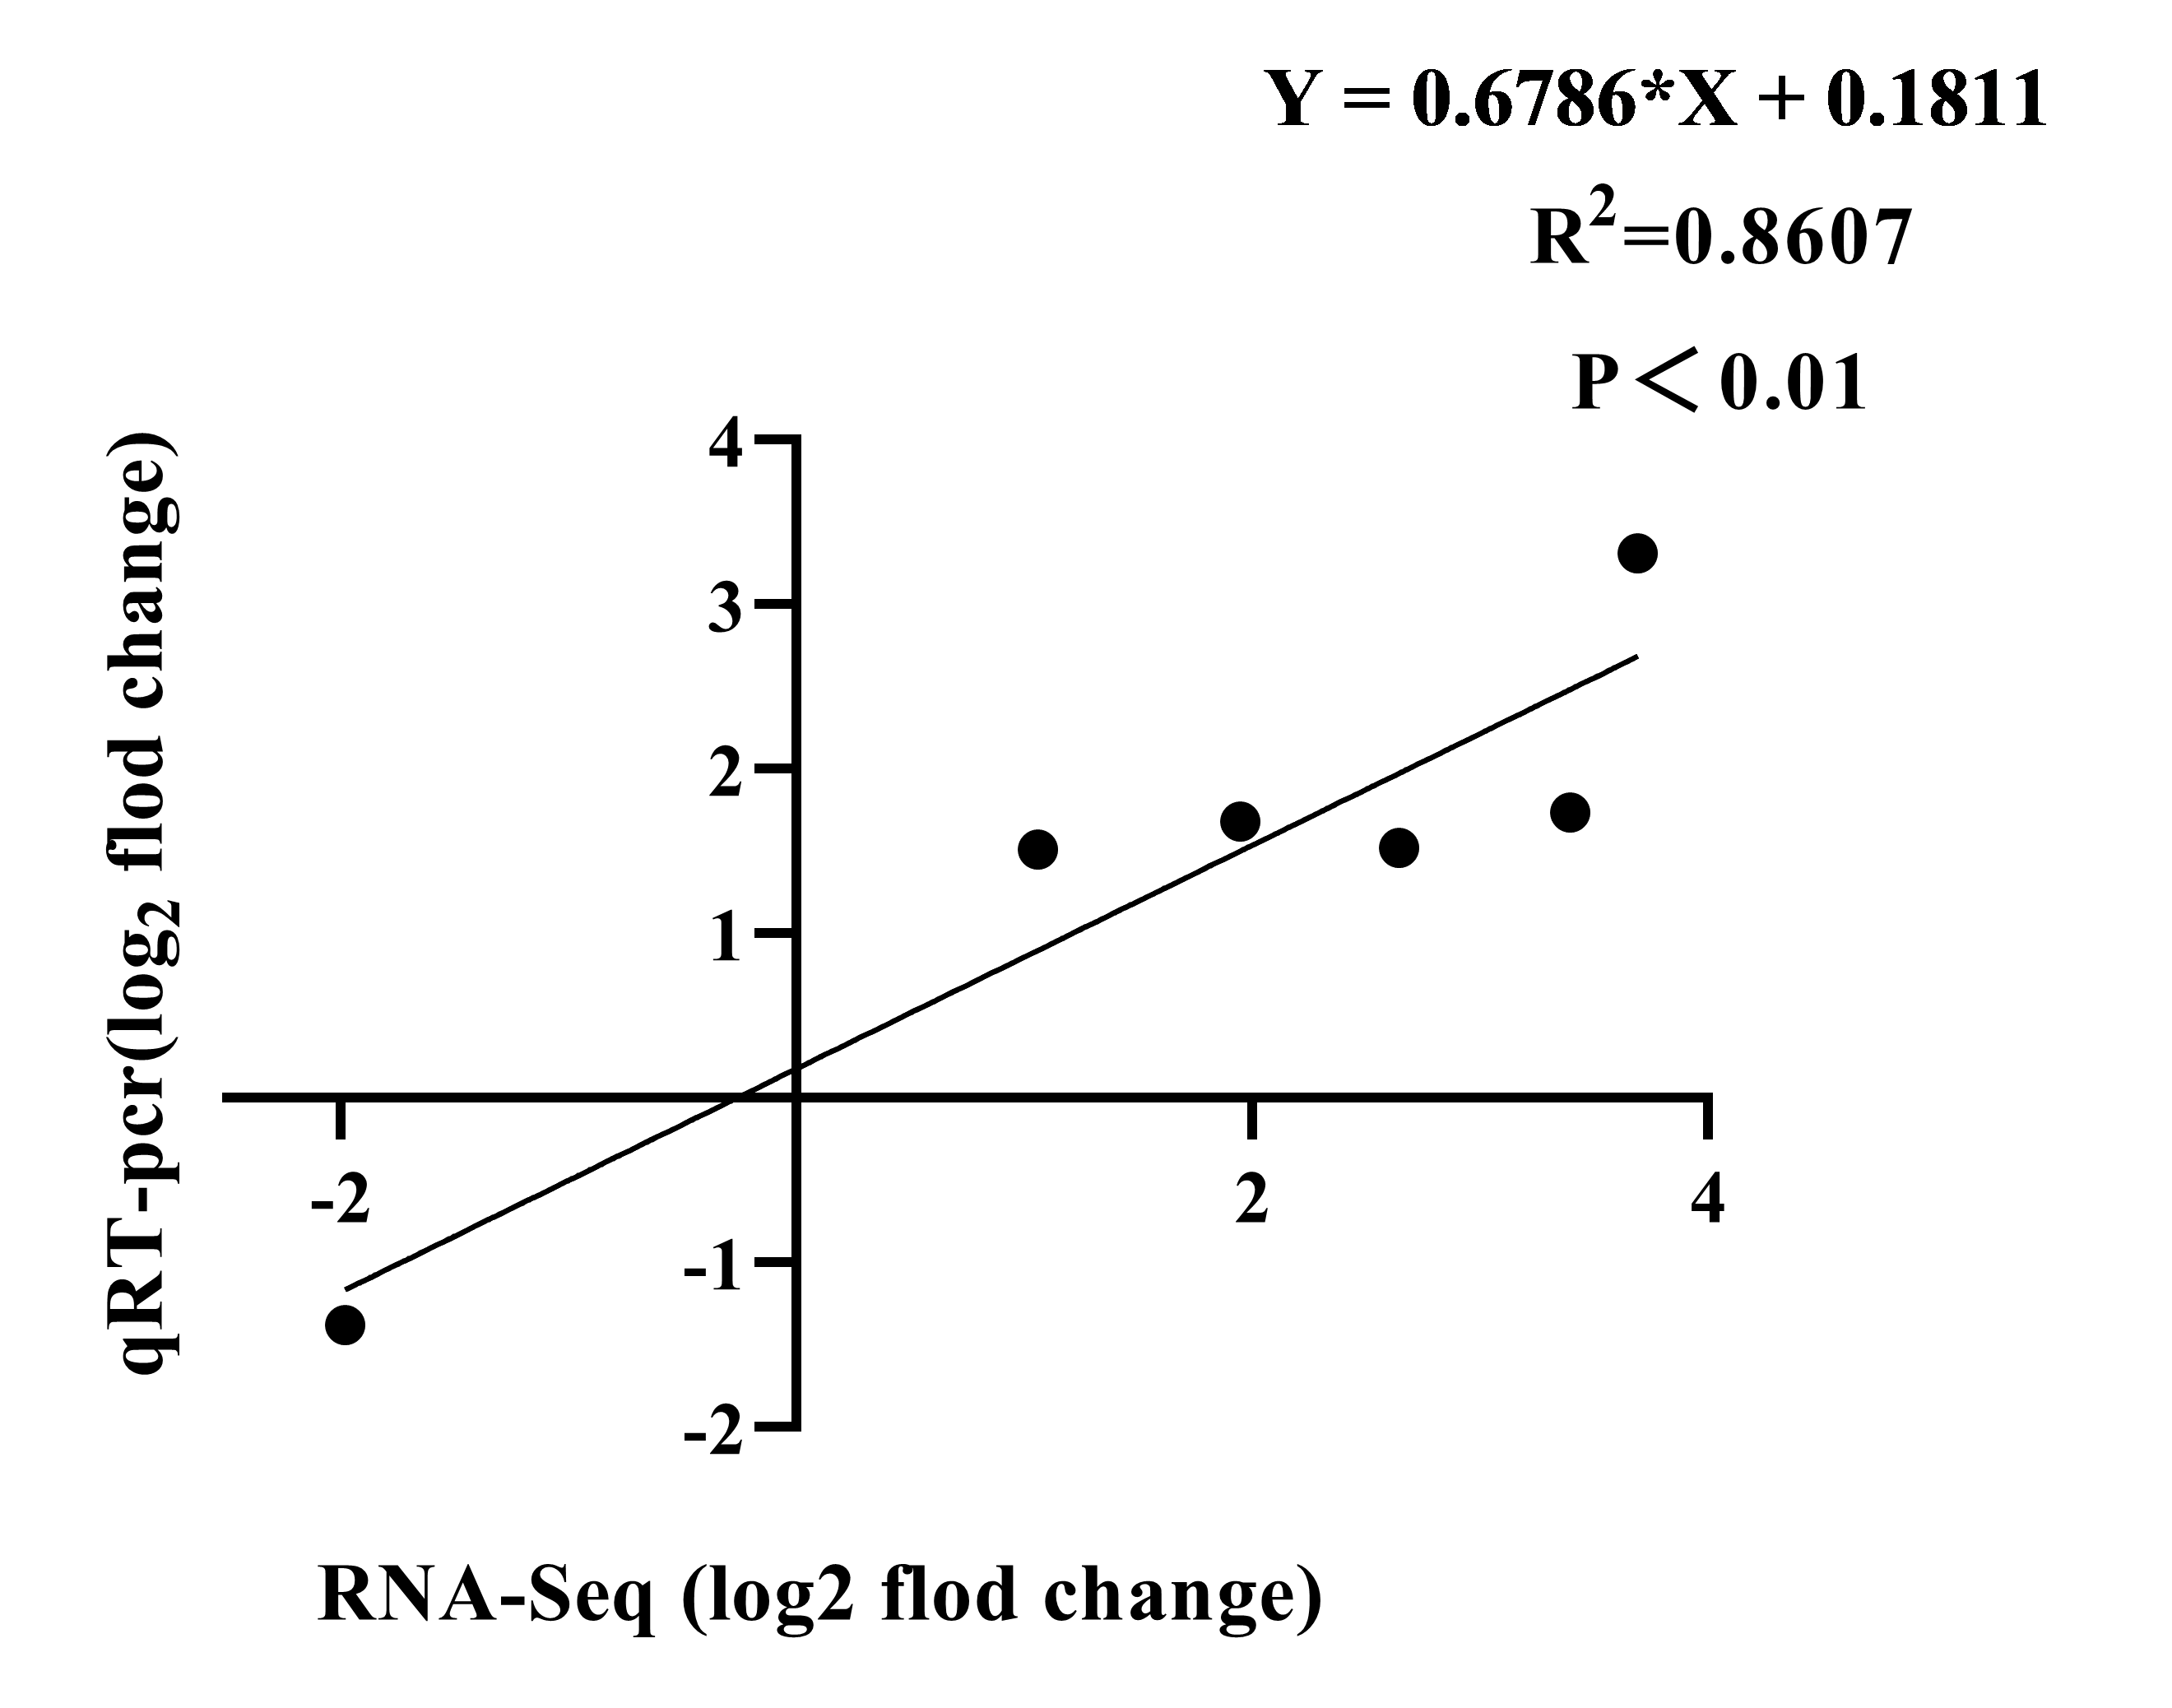

Supplement: s1 [file s1 › Figure S9.tif]
